# Supplementary material for: Preparation of trypsin aptamer modified silica particles by surface initiated atom transfer radical polymerization for proteome identification
Source: Royal Society of Chemistry journal article supplement (doi:10.1039/c5ay02080h), 2016-01-01
Supplement: c5ay02080h1.xlsx [file c5ay02080h1.xlsx]

## Sheet: 0 site-free digestion-01
Accession	Protein name	Species	Protein MW(Da)	Coverage (%)	Spectra	Unique peptides	MS/MS Search (score)	Mean peptide Spectral Intensity
P02769	serum albumin	BOVIN	71289	57.1	54	30	379.66	42100000
Sequence	z	Score	SPI	Spectrum Intensity	RT	m/z	MH+	Peptide pI
			(%)		(min)	Measured	Matched
						(Da)	(Da)
(K)DAFLGSFLYEYSR(R)	2	18.87	97.6	264000000	52.66	784.36	1567.74	4.37
(K)GLVLIAFSQYLQQCPFDEHVK(L)	3	18.73	94.6	17800000	59.56	831.53	2492.26	5.32
(R)MPCTEDYLSLILNR(L)	3	17.91	98.3	14500000	53.48	575.83	1724.84	4.37
(R)RPCFSALTPDETYVPK(A)	3	17.74	94.3	51100000	36.99	627.83	1880.92	6.07
(K)LVNELTEFAK(T)	2	17.71	98.1	161000000	37.95	582.5	1163.63	4.53
(K)LGEYGFQNALIVR(Y)	3	17.7	88.9	9850000	43.55	494.11	1479.8	6
(R)MPCTEDYLSLILNR(L)	2	16.69	92.8	114000000	53.36	863.32	1724.84	4.37
(R)HPYFYAPELLYYANK(Y)	3	16.13	87	10900000	48.86	630.52	1888.93	6.75
(K)LFTFHADICTLPDTEK(Q)	2	15.78	90.2	35700000	43.16	954.44	1907.92	4.54
(K)TVMENFVAFVDK(C)	2	15.22	90.7	149000000	50.76	700.58	1399.69	4.37
(K)LGEYGFQNALIVR(Y)	2	15.13	90.6	382000000	42.55	740.5	1479.8	6
(K)YICDNQDTISSK(L)	2	14.88	90.5	35600000	19.49	722.27	1443.64	4.21
(K)LFTFHADICTLPDTEK(Q)	3	14.52	85	60500000	43.13	636.89	1907.92	4.54
(K)DAFLGSFLYEYSR(R)	3	14.51	89.1	7770000	52.79	523.52	1567.74	4.37
(K)SLHTLFGDELCK(V)	2	14.38	85.3	24300000	39.8	710.34	1419.69	5.3
(K)SLHTLFGDELCK(V)	3	14.33	84.1	14500000	39.83	474.17	1419.69	5.3
(K)LKPDPNTLCDEFK(A)	3	13.6	85.6	13500000	34.34	526.56	1576.77	4.56
(K)YICDNQDTISSK(L)	2	13.35	89.9	27100000	21.51	722.33	1443.64	4.21
(K)VPQVSTPTLVEVSR(S)	2	12.96	88.6	18400000	35.68	756.47	1511.84	5.97
(K)AEFVEVTK(L)	2	12.87	91.8	50400000	23.58	461.72	922.488	4.53
(K)DAIPENLPPLTADFAEDK(D)	2	12.76	89.9	6590000	45.55	978.39	1955.96	3.77
(K)LKPDPNTLCDEFK(A)	3	12.73	68.9	13400000	34.53	526.49	1576.77	4.56
(K)YICDNQDTISSK(L)	2	12.64	82.5	6240000	3.35	722.4	1443.64	4.21
(K)HLVDEPQNLIK(Q)	2	12.62	86.9	64200000	31.59	653.38	1305.72	5.32
(K)DAFLGSFLYEYSR(R)	2	12.38	82	19000000	54.23	784.33	1567.74	4.37
(K)LKPDPNTLCDEFK(A)	2	12.13	87	25800000	34.05	788.87	1576.77	4.56
(K)EACFAVEGPK(L)	2	11.83	89.2	2900000	26.34	554.24	1107.51	4.53
(K)GACLLPK(I)	2	11.41	79.2	3440000	22.86	379.75	758.423	8.75
(R)mPCTEDYLSLILNR(L)	2	11.28	75.3	3810000	51.34	870.82	1724.84	4.37
(K)DAIPENLPPLTADFAEDK(D)	3	11.2	74.9	2330000	45.68	652.9	1955.96	3.77
(K)QTALVELLK(H)	2	11.12	90.3	56100000	41.87	507.9	1014.62	6
(K)LVVSTQTALA(-)	2	11.06	71.8	23600000	31.76	502.09	1002.58	5.52
(K)DDPHACYSTVFDK(L)	2	10.99	73.7	9640000	30.47	777.79	1554.65	4.41
(K)LVVSTQTALA(-)	2	10.56	79.7	23600000	31.69	501.89	1002.58	5.52
(R)MPCTEDYLSLILNR(L)	2	10.37	70.3	114000000	53.45	863.18	1724.84	4.37
(K)CCTESLVNR(R)	2	10.26	76.3	3460000	19.56	569.72	1138.5	6
(R)HPYFYAPELLYYANK(Y)	2	9.77	79.2	11900000	48.98	945.17	1888.93	6.75
(K)GLVLIAFSQYLQQCPFDEHVK(L)	3	9.74	74	17800000	60.17	831.83	2492.26	5.32
(K)DAFLGSFLYEYSR(R)	2	9.68	65.5	8870000	54.93	784.85	1567.74	4.37
(K)DAFLGSFLYEYSR(R)	2	9.62	71.9	28100000	54.13	784.34	1567.74	4.37
(K)DLGEEHFK(G)	2	8.98	88.2	2510000	21.9	488.47	974.458	4.65
(R)RPCFSALTPDETYVPK(A)	2	8.49	74.7	58300000	36.96	940.97	1880.92	6.07
(K)YNGVFQECCQAEDK(G)	2	8.27	72.9	9650000	28.56	874.32	1747.7	4.14
(K)YLYEIAR(R)	2	8.19	96.6	61900000	31.47	464.35	927.493	6
(K)YICDNQDTISSK(L)	2	8.04	82.2	31300000	20.8	722.34	1443.64	4.21
(R)ETYGDMADCCEK(Q)	2	7.99	80.2	3760000	22.44	739.78	1478.52	3.91
(K)LVNELTEFAK(T)	2	7.66	61.3	160000000	38.66	582.36	1163.63	4.53
(K)QNCDQFEK(L)	2	7.6	89.1	3200000	5.06	534.82	1068.44	4.37
(K)DDSPDLPK(L)	2	7.4	74.4	2410000	16.27	443.71	886.415	3.93
(K)ATEEQLK(T)	2	7.36	64.9	785000	2.33	409.76	818.425	4.53
(K)LVTDLTK(V)	2	7.34	94	18300000	19.28	395.22	789.472	5.84
(R)ETYGDMADCCEK(Q)	2	6.96	89	4000000	22.51	739.75	1478.52	3.91
(K)YICDNQDTISSK(L)	2	6.38	80.9	6440000	3.58	722.36	1443.64	4.21
(K)CCTESLVNR(R)	2	6.04	79.7	3090000	20.19	569.8	1138.5	6

## Sheet: 1 site-free digestion-01
Accession	Protein name	Species	Protein MW(Da)	Coverage (%)	Spectra	Unique peptides	MS/MS Search (score)	Mean peptide Spectral Intensity
P02769	serum albumin	BOVIN	71289	67.2	76	40	511.56	38000000
Sequence	z	Score	SPI	Spectrum	RT	m/z	MH+	Peptide pI
			(%)	Intensity	(min)	Measured	Matched
						(Da)	(Da)
(R)RHPYFYAPELLYYANK(Y)	3	20.21	89.8	5410000	46.75	682.39	2045.03	8.39
(K)DAFLGSFLYEYSR(R)	2	18.87	97.6	264000000	52.66	784.36	1567.74	4.37
(K)GLVLIAFSQYLQQCPFDEHVK(L)	3	18.73	94.6	17800000	59.56	831.53	2492.26	5.32
(R)MPCTEDYLSLILNR(L)	3	17.91	98.3	14500000	53.48	575.83	1724.84	4.37
(R)RPCFSALTPDETYVPK(A)	3	17.74	94.3	51100000	36.99	627.83	1880.92	6.07
(K)LVNELTEFAK(T)	2	17.71	98.1	161000000	37.95	582.5	1163.63	4.53
(K)LGEYGFQNALIVR(Y)	3	17.7	88.9	9850000	43.55	494.11	1479.8	6
(R)RHPYFYAPELLYYANK(Y)	4	16.88	90	2070000	46.78	512.38	2045.03	8.39
(R)RHPEYAVSVLLR(L)	3	16.84	96.8	9330000	37.19	480.74	1439.81	8.75
(R)MPCTEDYLSLILNR(L)	2	16.69	92.8	114000000	53.36	863.32	1724.84	4.37
(R)HPYFYAPELLYYANK(Y)	3	16.13	87	10900000	48.86	630.52	1888.93	6.75
(R)KVPQVSTPTLVEVSR(S)	3	15.96	82.3	68000000	34.12	547.5	1639.94	8.75
(K)LFTFHADICTLPDTEK(Q)	2	15.78	90.2	35700000	43.16	954.44	1907.92	4.54
(K)TVMENFVAFVDK(C)	2	15.22	90.7	149000000	50.76	700.58	1399.69	4.37
(K)LGEYGFQNALIVR(Y)	2	15.13	90.6	382000000	42.55	740.5	1479.8	6
(R)FKDLGEEHFK(G)	2	15.06	86	2570000	26.62	625.73	1249.62	5.44
(K)YICDNQDTISSK(L)	2	14.88	90.5	35600000	19.49	722.27	1443.64	4.21
(R)FKDLGEEHFK(G)	3	14.65	76.2	3150000	26.72	417.44	1249.62	5.44
(K)LFTFHADICTLPDTEK(Q)	3	14.52	85	60500000	43.13	636.89	1907.92	4.54
(K)DAFLGSFLYEYSR(R)	3	14.51	89.1	7770000	52.79	523.52	1567.74	4.37
(K)SLHTLFGDELCK(V)	2	14.38	85.3	24300000	39.8	710.34	1419.69	5.3
(K)SLHTLFGDELCK(V)	3	14.33	84.1	14500000	39.83	474.17	1419.69	5.3
(K)CCAADDKEACFAVEGPK(L)	3	13.94	89.3	4310000	28.19	643.28	1927.8	4.32
(K)KQTALVELLK(H)	2	13.88	96.1	8800000	37.99	571.87	1142.71	8.59
(K)LKPDPNTLCDEFK(A)	3	13.6	85.6	13500000	34.34	526.56	1576.77	4.56
(K)YICDNQDTISSK(L)	2	13.35	89.9	27100000	21.51	722.33	1443.64	4.21
(K)VPQVSTPTLVEVSR(S)	2	12.96	88.6	18400000	35.68	756.47	1511.84	5.97
(K)DAIPENLPPLTADFAEDKDVCK(N)	2	12.92	85.1	7080000	44.29	1229.54	2458.18	3.96
(K)AEFVEVTK(L)	2	12.87	91.8	50400000	23.58	461.72	922.488	4.53
(K)DAIPENLPPLTADFAEDK(D)	2	12.76	89.9	6590000	45.55	978.39	1955.96	3.77
(K)LKPDPNTLCDEFK(A)	3	12.73	68.9	13400000	34.53	526.49	1576.77	4.56
(K)YICDNQDTISSK(L)	2	12.64	82.5	6240000	3.35	722.4	1443.64	4.21
(K)HLVDEPQNLIK(Q)	2	12.62	86.9	64200000	31.59	653.38	1305.72	5.32
(K)DAFLGSFLYEYSR(R)	2	12.38	82	19000000	54.23	784.33	1567.74	4.37
(K)LKPDPNTLCDEFK(A)	2	12.13	87	25800000	34.05	788.87	1576.77	4.56
(R)FKDLGEEHFK(G)	3	12.07	72.9	3020000	26.52	417.39	1249.62	5.44
(K)EACFAVEGPK(L)	2	11.83	89.2	2900000	26.34	554.24	1107.51	4.53
(K)GACLLPK(I)	2	11.41	79.2	3440000	22.86	379.75	758.423	8.75
(R)mPCTEDYLSLILNR(L)	2	11.28	75.3	3810000	51.34	870.82	1724.84	4.37
(K)DAIPENLPPLTADFAEDK(D)	3	11.2	74.9	2330000	45.68	652.9	1955.96	3.77
(K)QTALVELLK(H)	2	11.12	90.3	56100000	41.87	507.9	1014.62	6
(K)LVVSTQTALA(-)	2	11.06	71.8	23600000	31.76	502.09	1002.58	5.52
(K)DDPHACYSTVFDK(L)	2	10.99	73.7	9640000	30.47	777.79	1554.65	4.41
(R)KVPQVSTPTLVEVSR(S)	2	10.66	75.2	197000000	33.96	820.41	1639.94	8.75
(K)LVVSTQTALA(-)	2	10.56	79.7	23600000	31.69	501.89	1002.58	5.52
(K)DAIPENLPPLTADFAEDKDVCK(N)	4	10.53	88.2	4910000	44.32	615.54	2458.18	3.96
(R)MPCTEDYLSLILNR(L)	2	10.37	70.3	114000000	53.45	863.18	1724.84	4.37
(K)CCTESLVNR(R)	2	10.26	76.3	3460000	19.56	569.72	1138.5	6
(R)KVPQVSTPTLVEVSR(S)	2	10.22	76.7	204000000	34.6	820.52	1639.94	8.75
(R)RHPEYAVSVLLR(L)	2	10	87.5	21400000	36.86	720.41	1439.81	8.75
(R)HPYFYAPELLYYANK(Y)	2	9.77	79.2	11900000	48.98	945.17	1888.93	6.75
(K)GLVLIAFSQYLQQCPFDEHVK(L)	3	9.74	74	17800000	60.17	831.83	2492.26	5.32
(K)DAFLGSFLYEYSR(R)	2	9.68	65.5	8870000	54.93	784.85	1567.74	4.37
(K)DAFLGSFLYEYSR(R)	2	9.62	71.9	28100000	54.13	784.34	1567.74	4.37
(K)SHCIAEVEKDAIPENLPPLTADFAEDK(D)	4	9.23	78.5	7030000	45.95	753.28	3009.45	4.19
(K)DLGEEHFK(G)	2	8.98	88.2	2510000	21.9	488.47	974.458	4.65
(R)RPCFSALTPDETYVPK(A)	2	8.49	74.7	58300000	36.96	940.97	1880.92	6.07
(K)YNGVFQECCQAEDK(G)	2	8.27	72.9	9650000	28.56	874.32	1747.7	4.14
(K)YLYEIAR(R)	2	8.19	96.6	61900000	31.47	464.35	927.493	6
(K)YICDNQDTISSK(L)	2	8.04	82.2	31300000	20.8	722.34	1443.64	4.21
(R)ETYGDMADCCEK(Q)	2	7.99	80.2	3760000	22.44	739.78	1478.52	3.91
(K)LVNELTEFAK(T)	2	7.66	61.3	160000000	38.66	582.36	1163.63	4.53
(K)QNCDQFEK(L)	2	7.6	89.1	3200000	5.06	534.82	1068.44	4.37
(K)ECCHGDLLECADDRADLAK(Y)	4	7.54	74.9	1090000	32.45	563.18	2247.94	4.23
(K)DDSPDLPK(L)	2	7.4	74.4	2410000	16.27	443.71	886.415	3.93
(K)ATEEQLK(T)	2	7.36	64.9	785000	2.33	409.76	818.425	4.53
(K)LVTDLTK(V)	2	7.34	94	18300000	19.28	395.22	789.472	5.84
(K)LVTDLTK(V)	2	7.33	93	9220000	17.17	395.28	789.472	5.84
(R)RHPEYAVSVLLR(L)	2	7.29	62.1	21200000	37.16	720.46	1439.81	8.75
(R)ETYGDMADCCEK(Q)	2	6.96	89	4000000	22.51	739.75	1478.52	3.91
(K)YICDNQDTISSK(L)	2	6.38	80.9	6440000	3.58	722.36	1443.64	4.21
(K)LVTDLTK(V)	2	6.36	94.9	16100000	22.4	395.3	789.472	5.84
(K)KFWGK(Y)	2	6.32	74	1170000	19.66	333.27	665.377	10
(K)LVTDLTK(V)	2	6.31	92.6	16400000	22.3	395.28	789.472	5.84
(K)CCTESLVNR(R)	2	6.22	88.5	3130000	19.25	569.79	1138.5	6
(K)CCTESLVNR(R)	2	6.04	79.7	3090000	20.19	569.8	1138.5	6

## Sheet: 2 site-free digestion-01
Accession	Protein name	Species	Protein MW(Da)	Coverage (%)	Spectra	Unique peptides	MS/MS Search (score)	Mean peptide Spectral Intensity
P02769	serum albumin	BOVIN	71289	67.2	77	41	525.45	38000000
Sequence	z	Score	SPI	Spectrum	RT	m/z	MH+	Peptide pI
			(%)	Intensity	(min)	Measured	Matched
						(Da)	(Da)
(R)RHPYFYAPELLYYANK(Y)	3	20.21	89.8	5410000	46.75	682.39	2045.03	8.39
(K)DAFLGSFLYEYSR(R)	2	18.87	97.6	264000000	52.66	784.36	1567.74	4.37
(K)GLVLIAFSQYLQQCPFDEHVK(L)	3	18.73	94.6	17800000	59.56	831.53	2492.26	5.32
(R)MPCTEDYLSLILNR(L)	3	17.91	98.3	14500000	53.48	575.83	1724.84	4.37
(R)RPCFSALTPDETYVPK(A)	3	17.74	94.3	51100000	36.99	627.83	1880.92	6.07
(K)LVNELTEFAK(T)	2	17.71	98.1	161000000	37.95	582.5	1163.63	4.53
(K)LGEYGFQNALIVR(Y)	3	17.7	88.9	9850000	43.55	494.11	1479.8	6
(R)RHPYFYAPELLYYANK(Y)	4	16.88	90	2070000	46.78	512.38	2045.03	8.39
(R)RHPEYAVSVLLR(L)	3	16.84	96.8	9330000	37.19	480.74	1439.81	8.75
(R)MPCTEDYLSLILNR(L)	2	16.69	92.8	114000000	53.36	863.32	1724.84	4.37
(R)HPYFYAPELLYYANK(Y)	3	16.13	87	10900000	48.86	630.52	1888.93	6.75
(R)KVPQVSTPTLVEVSR(S)	3	15.96	82.3	68000000	34.12	547.5	1639.94	8.75
(K)LFTFHADICTLPDTEK(Q)	2	15.78	90.2	35700000	43.16	954.44	1907.92	4.54
(K)TVMENFVAFVDK(C)	2	15.22	90.7	149000000	50.76	700.58	1399.69	4.37
(K)LGEYGFQNALIVR(Y)	2	15.13	90.6	382000000	42.55	740.5	1479.8	6
(R)FKDLGEEHFK(G)	2	15.06	86	2570000	26.62	625.73	1249.62	5.44
(K)YICDNQDTISSK(L)	2	14.88	90.5	35600000	19.49	722.27	1443.64	4.21
(R)FKDLGEEHFK(G)	3	14.65	76.2	3150000	26.72	417.44	1249.62	5.44
(K)LFTFHADICTLPDTEK(Q)	3	14.52	85	60500000	43.13	636.89	1907.92	4.54
(K)DAFLGSFLYEYSR(R)	3	14.51	89.1	7770000	52.79	523.52	1567.74	4.37
(K)SLHTLFGDELCK(V)	2	14.38	85.3	24300000	39.8	710.34	1419.69	5.3
(K)SLHTLFGDELCK(V)	3	14.33	84.1	14500000	39.83	474.17	1419.69	5.3
(K)CCAADDKEACFAVEGPK(L)	3	13.94	89.3	4310000	28.19	643.28	1927.8	4.32
(K)SHCIAEVEKDAIPENLPPLTADFAEDKDVCK(N)	4	13.89	83.2	21900000	44.7	878.97	3511.67	4.28
(K)KQTALVELLK(H)	2	13.88	96.1	8800000	37.99	571.87	1142.71	8.59
(K)LKPDPNTLCDEFK(A)	3	13.6	85.6	13500000	34.34	526.56	1576.77	4.56
(K)YICDNQDTISSK(L)	2	13.35	89.9	27100000	21.51	722.33	1443.64	4.21
(K)VPQVSTPTLVEVSR(S)	2	12.96	88.6	18400000	35.68	756.47	1511.84	5.97
(K)DAIPENLPPLTADFAEDKDVCK(N)	2	12.92	85.1	7080000	44.29	1229.54	2458.18	3.96
(K)AEFVEVTK(L)	2	12.87	91.8	50400000	23.58	461.72	922.488	4.53
(K)DAIPENLPPLTADFAEDK(D)	2	12.76	89.9	6590000	45.55	978.39	1955.96	3.77
(K)LKPDPNTLCDEFK(A)	3	12.73	68.9	13400000	34.53	526.49	1576.77	4.56
(K)YICDNQDTISSK(L)	2	12.64	82.5	6240000	3.35	722.4	1443.64	4.21
(K)HLVDEPQNLIK(Q)	2	12.62	86.9	64200000	31.59	653.38	1305.72	5.32
(K)DAFLGSFLYEYSR(R)	2	12.38	82	19000000	54.23	784.33	1567.74	4.37
(K)LKPDPNTLCDEFK(A)	2	12.13	87	25800000	34.05	788.87	1576.77	4.56
(R)FKDLGEEHFK(G)	3	12.07	72.9	3020000	26.52	417.39	1249.62	5.44
(K)EACFAVEGPK(L)	2	11.83	89.2	2900000	26.34	554.24	1107.51	4.53
(K)GACLLPK(I)	2	11.41	79.2	3440000	22.86	379.75	758.423	8.75
(R)mPCTEDYLSLILNR(L)	2	11.28	75.3	3810000	51.34	870.82	1724.84	4.37
(K)DAIPENLPPLTADFAEDK(D)	3	11.2	74.9	2330000	45.68	652.9	1955.96	3.77
(K)QTALVELLK(H)	2	11.12	90.3	56100000	41.87	507.9	1014.62	6
(K)LVVSTQTALA(-)	2	11.06	71.8	23600000	31.76	502.09	1002.58	5.52
(K)DDPHACYSTVFDK(L)	2	10.99	73.7	9640000	30.47	777.79	1554.65	4.41
(R)KVPQVSTPTLVEVSR(S)	2	10.66	75.2	197000000	33.96	820.41	1639.94	8.75
(K)LVVSTQTALA(-)	2	10.56	79.7	23600000	31.69	501.89	1002.58	5.52
(K)DAIPENLPPLTADFAEDKDVCK(N)	4	10.53	88.2	4910000	44.32	615.54	2458.18	3.96
(R)MPCTEDYLSLILNR(L)	2	10.37	70.3	114000000	53.45	863.18	1724.84	4.37
(K)CCTESLVNR(R)	2	10.26	76.3	3460000	19.56	569.72	1138.5	6
(R)KVPQVSTPTLVEVSR(S)	2	10.22	76.7	204000000	34.6	820.52	1639.94	8.75
(R)RHPEYAVSVLLR(L)	2	10	87.5	21400000	36.86	720.41	1439.81	8.75
(R)HPYFYAPELLYYANK(Y)	2	9.77	79.2	11900000	48.98	945.17	1888.93	6.75
(K)GLVLIAFSQYLQQCPFDEHVK(L)	3	9.74	74	17800000	60.17	831.83	2492.26	5.32
(K)DAFLGSFLYEYSR(R)	2	9.68	65.5	8870000	54.93	784.85	1567.74	4.37
(K)SHCIAEVEKDAIPENLPPLTADFAEDKDVCK(N)	4	9.63	86.9	21100000	44.77	878.95	3511.67	4.28
(K)DAFLGSFLYEYSR(R)	2	9.62	71.9	28100000	54.13	784.34	1567.74	4.37
(K)SHCIAEVEKDAIPENLPPLTADFAEDK(D)	4	9.23	78.5	7030000	45.95	753.28	3009.45	4.19
(K)DLGEEHFK(G)	2	8.98	88.2	2510000	21.9	488.47	974.458	4.65
(R)RPCFSALTPDETYVPK(A)	2	8.49	74.7	58300000	36.96	940.97	1880.92	6.07
(K)YNGVFQECCQAEDK(G)	2	8.27	72.9	9650000	28.56	874.32	1747.7	4.14
(K)YLYEIAR(R)	2	8.19	96.6	61900000	31.47	464.35	927.493	6
(K)YICDNQDTISSK(L)	2	8.04	82.2	31300000	20.8	722.34	1443.64	4.21
(R)ETYGDMADCCEK(Q)	2	7.99	80.2	3760000	22.44	739.78	1478.52	3.91
(K)LVNELTEFAK(T)	2	7.66	61.3	160000000	38.66	582.36	1163.63	4.53
(K)QNCDQFEK(L)	2	7.6	89.1	3200000	5.06	534.82	1068.44	4.37
(K)ECCHGDLLECADDRADLAK(Y)	4	7.54	74.9	1090000	32.45	563.18	2247.94	4.23
(K)DDSPDLPK(L)	2	7.4	74.4	2410000	16.27	443.71	886.415	3.93
(K)ATEEQLK(T)	2	7.36	64.9	785000	2.33	409.76	818.425	4.53
(K)LVTDLTK(V)	2	7.34	94	18300000	19.28	395.22	789.472	5.84
(K)LVTDLTK(V)	2	7.33	93	9220000	17.17	395.28	789.472	5.84
(R)RHPEYAVSVLLR(L)	2	7.29	62.1	21200000	37.16	720.46	1439.81	8.75
(R)ETYGDMADCCEK(Q)	2	6.96	89	4000000	22.51	739.75	1478.52	3.91
(K)YICDNQDTISSK(L)	2	6.38	80.9	6440000	3.58	722.36	1443.64	4.21
(K)LVTDLTK(V)	2	6.36	94.9	16100000	22.4	395.3	789.472	5.84
(K)KFWGK(Y)	2	6.32	74	1170000	19.66	333.27	665.377	10
(K)LVTDLTK(V)	2	6.31	92.6	16400000	22.3	395.28	789.472	5.84
(K)CCTESLVNR(R)	2	6.04	79.7	3090000	20.19	569.8	1138.5	6

## Sheet: 0 site-free digestion-02
Accession	Protein name	Species	Protein MW(Da)	Coverage (%)	Spectra	Unique peptides	MS/MS Search (score)	Mean peptide Spectral Intensity
P02769	serum albumin	BOVIN	71289	63.5	63	32	461.72	51200000
Sequence	z	Score	SPI	Spectrum	RT	m/z	MH+	Peptide pI
			(%)	Intensity	(min)	Measured	Matched
						(Da)	(Da)
(K)GLVLIAFSQYLQQCPFDEHVK(L)	3	20.92	98.4	6450000	38.82	831.47	2492.26	5.32
(K)DAFLGSFLYEYSR(R)	2	20.5	100	70000000	34.82	784.41	1567.74	4.37
(R)MPCTEDYLSLILNR(L)	3	19.45	99.1	19900000	36.03	575.68	1724.84	4.37
(K)ECCHGDLLECADDR(A)	3	19.44	98.7	93200000	8.77	583.94	1749.66	4.1
(K)GLVLIAFSQYLQQCPFDEHVK(L)	4	19.38	93.5	1480000	39.14	623.99	2492.26	5.32
(K)LGEYGFQNALIVR(Y)	2	18.83	96.4	193000000	25.5	740.41	1479.8	6
(R)HPYFYAPELLYYANK(Y)	3	18.69	95.5	6530000	30.08	630.31	1888.93	6.75
(K)DAFLGSFLYEYSR(R)	3	18.6	92.2	4940000	35.15	523.39	1567.74	4.37
(K)ECCHGDLLECADDR(A)	3	18.38	97.7	57200000	10.87	584	1749.66	4.1
(K)ECCHGDLLECADDR(A)	3	16.72	94.2	20300000	13.11	584.01	1749.66	4.1
(K)TVMENFVAFVDK(C)	2	16.33	94.2	93800000	31.28	700.55	1399.69	4.37
(K)YNGVFQECCQAEDK(G)	3	16.09	88.3	19800000	13.46	583.3	1747.7	4.14
(R)RPCFSALTPDETYVPK(A)	3	16.09	91.1	117000000	21.45	627.86	1880.92	6.07
(K)LFTFHADICTLPDTEK(Q)	3	16.04	90.1	73700000	25.25	636.69	1907.92	4.54
(K)ECCHGDLLECADDR(A)	2	15.78	92.8	61000000	9.16	875.32	1749.66	4.1
(K)HLVDEPQNLIK(Q)	2	15.58	93.6	48800000	15.2	653.35	1305.72	5.32
(K)LKPDPNTLCDEFK(A)	3	15.31	92.5	70500000	19.36	526.32	1576.77	4.56
(K)LVVSTQTALA(-)	2	14.77	84.7	39400000	18.21	501.81	1002.58	5.52
(K)LVNELTEFAK(T)	2	14.64	94.1	190000000	20.72	582.36	1163.63	4.53
(K)TCVADESHAGCEK(S)	3	14.58	86.2	17300000	1.72	488.59	1463.59	4.65
(K)YICDNQDTISSK(L)	2	14.52	92.9	182000000	3.64	722.36	1443.64	4.21
(K)HLVDEPQNLIK(Q)	3	14.5	88.6	20400000	15.33	436.03	1305.72	5.32
(K)GLVLIAFSQYLQQCPFDEHVK(L)	4	14.32	86.4	1500000	39.25	623.99	2492.26	5.32
(K)EYEATLEECCAK(D)	2	13.87	86.7	130000000	9.3	751.82	1502.61	4.09
(K)EACFAVEGPK(L)	2	13.58	92.9	32200000	7.05	554.29	1107.51	4.53
(K)SLHTLFGDELCK(V)	2	13.55	90	41500000	20.63	710.43	1419.69	5.3
(K)EYEATLEECCAK(D)	2	13.38	85.4	116000000	11.44	751.86	1502.61	4.09
(K)VPQVSTPTLVEVSR(S)	2	13.25	87.6	60800000	20.82	756.36	1511.84	5.97
(K)DLGEEHFK(G)	2	13.12	93.9	16000000	3.26	487.76	974.458	4.65
(R)MPCTEDYLSLILNR(L)	2	13.03	86	77100000	35.7	862.98	1724.84	4.37
(K)LFTFHADICTLPDTEK(Q)	2	13.01	82	26500000	25.53	954.52	1907.92	4.54
(R)ETYGDMADCCEK(Q)	2	12.95	90.4	28200000	5.1	739.73	1478.52	3.91
(K)LGEYGFQNALIVR(Y)	3	12.88	85.8	6570000	25.69	494.07	1479.8	6
(K)ECCDKPLLEK(S)	3	12.86	83.3	26800000	2.84	431.46	1291.6	4.68
(K)YNGVFQECCQAEDK(G)	2	12.59	89	152000000	13.32	874.79	1747.7	4.14
(K)LKPDPNTLCDEFK(A)	2	12.35	93.8	68800000	19.58	788.94	1576.77	4.56
(K)GACLLPK(I)	2	12.31	78.9	22500000	3.73	379.78	758.423	8.75
(K)DAIPENLPPLTADFAEDK(D)	3	12.27	89.9	5770000	30.8	652.94	1955.96	3.77
(K)TVmENFVAFVDK(C)	2	12.07	76.3	4530000	25.22	708.36	1399.69	4.37
(K)CCTESLVNR(R)	2	11.63	86.6	32100000	3.12	569.79	1138.5	6
(K)SHCIAEVEK(D)	3	11.46	65.1	3460000	2.57	358.3	1072.51	5.38
(K)DDPHACYSTVFDK(L)	2	11.43	73.9	80100000	16.17	777.86	1554.65	4.41
(K)SLHTLFGDELCK(V)	3	11.37	81.7	50700000	20.5	474.03	1419.69	5.3
(K)TCVADESHAGCEK(S)	2	11.35	96.9	2400000	1.65	732.31	1463.59	4.65
(K)EYEATLEECCAK(D)	3	11.09	76.3	7100000	10.06	501.6	1502.61	4.09
(K)YNGVFQECCQAEDK(G)	2	10.97	85.3	135000000	13.43	874.44	1747.7	4.14
(R)HPEYAVSVLLR(L)	2	10.39	95.8	9330000	20.34	642.37	1283.71	6.75
(K)LFTFHADICTLPDTEK(Q)	3	10.17	77	12400000	26.78	636.96	1907.92	4.54
(K)SHCIAEVEK(D)	2	10.12	82.4	18200000	1.94	536.81	1072.51	5.38
(K)QTALVELLK(H)	2	10.07	89.2	82400000	21.86	507.83	1014.62	6
(K)AEFVEVTK(L)	2	10	85.7	59100000	4.38	461.77	922.488	4.53
(K)DAIPENLPPLTADFAEDK(D)	2	9.88	94.4	12500000	30.48	978.49	1955.96	3.77
(K)LFTFHADICTLPDTEK(Q)	2	9.87	97.6	26400000	25.41	954.53	1907.92	4.54
(K)DDPHACYSTVFDK(L)	3	9.58	64.1	77800000	16.27	518.98	1554.65	4.41
(K)ECCHGDLLECADDR(A)	2	9.5	100	18600000	11.28	875.7	1749.66	4.1
(K)DAFLGSFLYEYSR(R)	2	9.32	94	1680000	37.13	784.34	1567.74	4.37
(K)YNGVFQECCQAEDK(G)	2	8.03	79.6	19400000	15.91	875.29	1747.7	4.14
(R)RPCFSALTPDETYVPK(A)	2	7.94	76.1	51200000	21.57	941.1	1880.92	6.07
(K)YNGVFQECCQAEDK(G)	2	7.86	95.2	135000000	13.93	874.53	1747.7	4.14
(R)MPCTEDYLSLILNR(L)	2	7.64	82.8	76400000	36.38	863.02	1724.84	4.37
(K)YICDNQDTISSK(L)	2	7.38	87	2080000	6.52	722.26	1443.64	4.21
(K)YICDNQDTISSK(L)	2	7.29	78.4	1730000	6.81	722.31	1443.64	4.21
(K)YLYEIAR(R)	2	7.2	97.1	86500000	14.06	464.29	927.493	6

## Sheet: 1 site-free digestion-02
Accession	Protein name	Species	Protein MW(Da)	Coverage (%)	Spectra	Unique peptides	MS/MS Search (score)	Mean peptide Spectral Intensity
P02769	serum albumin	BOVIN	71289	66.7	73	39	547.25	47300000
Sequence	z	Score	SPI	Spectrum	RT	m/z	MH+	Peptide pI
			(%)	Intensity	(min)	Measured	Matched
						(Da)	(Da)
(K)GLVLIAFSQYLQQCPFDEHVK(L)	3	20.92	98.4	6450000	38.82	831.47	2492.26	5.32
(K)DAFLGSFLYEYSR(R)	2	20.5	100	70000000	34.82	784.41	1567.74	4.37
(R)MPCTEDYLSLILNR(L)	3	19.45	99.1	19900000	36.03	575.68	1724.84	4.37
(K)ECCHGDLLECADDR(A)	3	19.44	98.7	93200000	8.77	583.94	1749.66	4.1
(K)GLVLIAFSQYLQQCPFDEHVK(L)	4	19.38	93.5	1480000	39.14	623.99	2492.26	5.32
(K)LGEYGFQNALIVR(Y)	2	18.83	96.4	193000000	25.5	740.41	1479.8	6
(R)HPYFYAPELLYYANK(Y)	3	18.69	95.5	6530000	30.08	630.31	1888.93	6.75
(K)DAFLGSFLYEYSR(R)	3	18.6	92.2	4940000	35.15	523.39	1567.74	4.37
(K)ECCHGDLLECADDR(A)	3	18.38	97.7	57200000	10.87	584	1749.66	4.1
(R)RHPEYAVSVLLR(L)	3	16.95	94.8	9160000	17.72	480.82	1439.81	8.75
(K)ECCHGDLLECADDR(A)	3	16.72	94.2	20300000	13.11	584.01	1749.66	4.1
(K)TVMENFVAFVDK(C)	2	16.33	94.2	93800000	31.28	700.55	1399.69	4.37
(K)YNGVFQECCQAEDK(G)	3	16.09	88.3	19800000	13.46	583.3	1747.7	4.14
(R)RPCFSALTPDETYVPK(A)	3	16.09	91.1	117000000	21.45	627.86	1880.92	6.07
(K)LFTFHADICTLPDTEK(Q)	3	16.04	90.1	73700000	25.25	636.69	1907.92	4.54
(K)ECCHGDLLECADDR(A)	2	15.78	92.8	61000000	9.16	875.32	1749.66	4.1
(K)HLVDEPQNLIK(Q)	2	15.58	93.6	48800000	15.2	653.35	1305.72	5.32
(R)KVPQVSTPTLVEVSR(S)	3	15.52	87.1	92300000	18.44	547.47	1639.94	8.75
(K)LKPDPNTLCDEFK(A)	3	15.31	92.5	70500000	19.36	526.32	1576.77	4.56
(K)CCAADDKEACFAVEGPK(L)	3	15.05	92.8	39100000	13.96	643.33	1927.8	4.32
(K)LVVSTQTALA(-)	2	14.77	84.7	39400000	18.21	501.81	1002.58	5.52
(K)LVNELTEFAK(T)	2	14.64	94.1	190000000	20.72	582.36	1163.63	4.53
(K)TCVADESHAGCEK(S)	3	14.58	86.2	17300000	1.72	488.59	1463.59	4.65
(K)YICDNQDTISSK(L)	2	14.52	92.9	182000000	3.64	722.36	1443.64	4.21
(K)HLVDEPQNLIK(Q)	3	14.5	88.6	20400000	15.33	436.03	1305.72	5.32
(K)GLVLIAFSQYLQQCPFDEHVK(L)	4	14.32	86.4	1500000	39.25	623.99	2492.26	5.32
(K)EYEATLEECCAK(D)	2	13.87	86.7	130000000	9.3	751.82	1502.61	4.09
(K)EACFAVEGPK(L)	2	13.58	92.9	32200000	7.05	554.29	1107.51	4.53
(K)SLHTLFGDELCK(V)	2	13.55	90	41500000	20.63	710.43	1419.69	5.3
(K)EYEATLEECCAK(D)	2	13.38	85.4	116000000	11.44	751.86	1502.61	4.09
(K)VPQVSTPTLVEVSR(S)	2	13.25	87.6	60800000	20.82	756.36	1511.84	5.97
(K)DLGEEHFK(G)	2	13.12	93.9	16000000	3.26	487.76	974.458	4.65
(R)MPCTEDYLSLILNR(L)	2	13.03	86	77100000	35.7	862.98	1724.84	4.37
(K)LFTFHADICTLPDTEK(Q)	2	13.01	82	26500000	25.53	954.52	1907.92	4.54
(R)ETYGDMADCCEK(Q)	2	12.95	90.4	28200000	5.1	739.73	1478.52	3.91
(K)LGEYGFQNALIVR(Y)	3	12.88	85.8	6570000	25.69	494.07	1479.8	6
(K)ECCDKPLLEK(S)	3	12.86	83.3	26800000	2.84	431.46	1291.6	4.68
(R)FKDLGEEHFK(G)	3	12.84	75.5	2580000	4.6	417.27	1249.62	5.44
(K)YNGVFQECCQAEDK(G)	2	12.59	89	152000000	13.32	874.79	1747.7	4.14
(K)LKPDPNTLCDEFK(A)	2	12.35	93.8	68800000	19.58	788.94	1576.77	4.56
(K)GACLLPK(I)	2	12.31	78.9	22500000	3.73	379.78	758.423	8.75
(K)DAIPENLPPLTADFAEDK(D)	3	12.27	89.9	5770000	30.8	652.94	1955.96	3.77
(R)KVPQVSTPTLVEVSR(S)	2	12.19	92.6	72200000	18.6	820.51	1639.94	8.75
(K)TVmENFVAFVDK(C)	2	12.07	76.3	4530000	25.22	708.36	1399.69	4.37
(K)CCTESLVNR(R)	2	11.63	86.6	32100000	3.12	569.79	1138.5	6
(K)SHCIAEVEK(D)	3	11.46	65.1	3460000	2.57	358.3	1072.51	5.38
(K)DDPHACYSTVFDK(L)	2	11.43	73.9	80100000	16.17	777.86	1554.65	4.41
(K)SLHTLFGDELCK(V)	3	11.37	81.7	50700000	20.5	474.03	1419.69	5.3
(K)TCVADESHAGCEK(S)	2	11.35	96.9	2400000	1.65	732.31	1463.59	4.65
(K)CCAADDKEACFAVEGPK(L)	2	11.23	82.9	14500000	13.84	964.69	1927.8	4.32
(K)EYEATLEECCAK(D)	3	11.09	76.3	7100000	10.06	501.6	1502.61	4.09
(K)YNGVFQECCQAEDK(G)	2	10.97	85.3	135000000	13.43	874.44	1747.7	4.14
(R)HPEYAVSVLLR(L)	2	10.39	95.8	9330000	20.34	642.37	1283.71	6.75
(K)LFTFHADICTLPDTEK(Q)	3	10.17	77	12400000	26.78	636.96	1907.92	4.54
(K)SHCIAEVEK(D)	2	10.12	82.4	18200000	1.94	536.81	1072.51	5.38
(K)QTALVELLK(H)	2	10.07	89.2	82400000	21.86	507.83	1014.62	6
(K)AEFVEVTK(L)	2	10	85.7	59100000	4.38	461.77	922.488	4.53
(K)DAIPENLPPLTADFAEDK(D)	2	9.88	94.4	12500000	30.48	978.49	1955.96	3.77
(K)LFTFHADICTLPDTEK(Q)	2	9.87	97.6	26400000	25.41	954.53	1907.92	4.54
(K)SHCIAEVEKDAIPENLPPLTADFAEDK(D)	4	9.8	94.3	3410000	29.98	753.46	3009.45	4.19
(K)DDPHACYSTVFDK(L)	3	9.58	64.1	77800000	16.27	518.98	1554.65	4.41
(K)ECCHGDLLECADDR(A)	2	9.5	100	18600000	11.28	875.7	1749.66	4.1
(K)DAFLGSFLYEYSR(R)	2	9.32	94	1680000	37.13	784.34	1567.74	4.37
(K)KQTALVELLK(H)	2	8.76	81.5	5610000	17.56	571.96	1142.71	8.59
(K)YNGVFQECCQAEDK(G)	2	8.03	79.6	19400000	15.91	875.29	1747.7	4.14
(R)RHPEYAVSVLLR(L)	2	8.01	93.1	5530000	17.81	720.46	1439.81	8.75
(K)CCAADDKEACFAVEGPK(L)	2	7.98	64.6	13900000	14.24	964.45	1927.8	4.32
(R)RPCFSALTPDETYVPK(A)	2	7.94	76.1	51200000	21.57	941.1	1880.92	6.07
(K)YNGVFQECCQAEDK(G)	2	7.86	95.2	135000000	13.93	874.53	1747.7	4.14
(R)MPCTEDYLSLILNR(L)	2	7.64	82.8	76400000	36.38	863.02	1724.84	4.37
(K)YICDNQDTISSK(L)	2	7.38	87	2080000	6.52	722.26	1443.64	4.21
(K)YICDNQDTISSK(L)	2	7.29	78.4	1730000	6.81	722.31	1443.64	4.21
(K)YLYEIAR(R)	2	7.2	97.1	86500000	14.06	464.29	927.493	6
(R)LCVLHEK(T)	2	6.61	85.2	15600000	2.74	449.82	898.481	6.75

## Sheet: 2 site-free digestion-02
Accession	Protein name	Species	Protein MW(Da)	Coverage (%)	Spectra	Unique peptides	MS/MS Search (score)	Mean peptide Spectral Intensity
P02769	serum albumin	BOVIN	71289	66.2	74	39	547.5	50600000
Sequence	z	Score	SPI	Spectrum	RT	m/z	MH+	Peptide pI
			(%)	Intensity	(min)	Measured	Matched
						(Da)	(Da)
(K)GLVLIAFSQYLQQCPFDEHVK(L)	3	20.92	98.4	6450000	38.82	831.47	2492.26	5.32
(K)DAFLGSFLYEYSR(R)	2	20.5	100	70000000	34.82	784.41	1567.74	4.37
(R)MPCTEDYLSLILNR(L)	3	19.45	99.1	19900000	36.03	575.68	1724.84	4.37
(K)ECCHGDLLECADDR(A)	3	19.44	98.7	93200000	8.77	583.94	1749.66	4.1
(K)GLVLIAFSQYLQQCPFDEHVK(L)	4	19.38	93.5	1480000	39.14	623.99	2492.26	5.32
(K)LGEYGFQNALIVR(Y)	2	18.83	96.4	193000000	25.5	740.41	1479.8	6
(R)HPYFYAPELLYYANK(Y)	3	18.69	95.5	6530000	30.08	630.31	1888.93	6.75
(K)DAFLGSFLYEYSR(R)	3	18.6	92.2	4940000	35.15	523.39	1567.74	4.37
(K)ECCHGDLLECADDR(A)	3	18.38	97.7	57200000	10.87	584	1749.66	4.1
(R)RHPEYAVSVLLR(L)	3	16.95	94.8	9160000	17.72	480.82	1439.81	8.75
(K)ECCHGDLLECADDR(A)	3	16.72	94.2	20300000	13.11	584.01	1749.66	4.1
(K)TVMENFVAFVDK(C)	2	16.33	94.2	93800000	31.28	700.55	1399.69	4.37
(K)YNGVFQECCQAEDK(G)	3	16.09	88.3	19800000	13.46	583.3	1747.7	4.14
(R)RPCFSALTPDETYVPK(A)	3	16.09	91.1	117000000	21.45	627.86	1880.92	6.07
(K)LFTFHADICTLPDTEK(Q)	3	16.04	90.1	73700000	25.25	636.69	1907.92	4.54
(K)ECCHGDLLECADDR(A)	2	15.78	92.8	61000000	9.16	875.32	1749.66	4.1
(K)HLVDEPQNLIK(Q)	2	15.58	93.6	48800000	15.2	653.35	1305.72	5.32
(R)KVPQVSTPTLVEVSR(S)	3	15.52	87.1	92300000	18.44	547.47	1639.94	8.75
(K)LKPDPNTLCDEFK(A)	3	15.31	92.5	70500000	19.36	526.32	1576.77	4.56
(K)CCAADDKEACFAVEGPK(L)	3	15.05	92.8	39100000	13.96	643.33	1927.8	4.32
(K)LVVSTQTALA(-)	2	14.77	84.7	39400000	18.21	501.81	1002.58	5.52
(K)LVNELTEFAK(T)	2	14.64	94.1	190000000	20.72	582.36	1163.63	4.53
(K)TCVADESHAGCEK(S)	3	14.58	86.2	17300000	1.72	488.59	1463.59	4.65
(K)YICDNQDTISSK(L)	2	14.52	92.9	182000000	3.64	722.36	1443.64	4.21
(K)HLVDEPQNLIK(Q)	3	14.5	88.6	20400000	15.33	436.03	1305.72	5.32
(K)GLVLIAFSQYLQQCPFDEHVK(L)	4	14.32	86.4	1500000	39.25	623.99	2492.26	5.32
(K)EYEATLEECCAK(D)	2	13.87	86.7	130000000	9.3	751.82	1502.61	4.09
(K)EACFAVEGPK(L)	2	13.58	92.9	32200000	7.05	554.29	1107.51	4.53
(K)SLHTLFGDELCK(V)	2	13.55	90	41500000	20.63	710.43	1419.69	5.3
(K)EYEATLEECCAK(D)	2	13.38	85.4	116000000	11.44	751.86	1502.61	4.09
(K)VPQVSTPTLVEVSR(S)	2	13.25	87.6	60800000	20.82	756.36	1511.84	5.97
(K)DLGEEHFK(G)	2	13.12	93.9	16000000	3.26	487.76	974.458	4.65
(R)MPCTEDYLSLILNR(L)	2	13.03	86	77100000	35.7	862.98	1724.84	4.37
(K)LFTFHADICTLPDTEK(Q)	2	13.01	82	26500000	25.53	954.52	1907.92	4.54
(R)ETYGDMADCCEK(Q)	2	12.95	90.4	28200000	5.1	739.73	1478.52	3.91
(K)LGEYGFQNALIVR(Y)	3	12.88	85.8	6570000	25.69	494.07	1479.8	6
(K)ECCDKPLLEK(S)	3	12.86	83.3	26800000	2.84	431.46	1291.6	4.68
(R)FKDLGEEHFK(G)	3	12.84	75.5	2580000	4.6	417.27	1249.62	5.44
(K)YNGVFQECCQAEDK(G)	2	12.59	89	152000000	13.32	874.79	1747.7	4.14
(K)LKPDPNTLCDEFK(A)	2	12.35	93.8	68800000	19.58	788.94	1576.77	4.56
(K)GACLLPK(I)	2	12.31	78.9	22500000	3.73	379.78	758.423	8.75
(K)DAIPENLPPLTADFAEDK(D)	3	12.27	89.9	5770000	30.8	652.94	1955.96	3.77
(R)KVPQVSTPTLVEVSR(S)	2	12.19	92.6	72200000	18.6	820.51	1639.94	8.75
(K)TVmENFVAFVDK(C)	2	12.07	76.3	4530000	25.22	708.36	1399.69	4.37
(K)CCTESLVNR(R)	2	11.63	86.6	32100000	3.12	569.79	1138.5	6
(K)SHCIAEVEK(D)	3	11.46	65.1	3460000	2.57	358.3	1072.51	5.38
(K)DDPHACYSTVFDK(L)	2	11.43	73.9	80100000	16.17	777.86	1554.65	4.41
(K)SLHTLFGDELCK(V)	3	11.37	81.7	50700000	20.5	474.03	1419.69	5.3
(K)TCVADESHAGCEK(S)	2	11.35	96.9	2400000	1.65	732.31	1463.59	4.65
(K)CCAADDKEACFAVEGPK(L)	2	11.23	82.9	14500000	13.84	964.69	1927.8	4.32
(K)EYEATLEECCAK(D)	3	11.09	76.3	7100000	10.06	501.6	1502.61	4.09
(K)YNGVFQECCQAEDK(G)	2	10.97	85.3	135000000	13.43	874.44	1747.7	4.14
(R)HPEYAVSVLLR(L)	2	10.39	95.8	9330000	20.34	642.37	1283.71	6.75
(K)LFTFHADICTLPDTEK(Q)	3	10.17	77	12400000	26.78	636.96	1907.92	4.54
(K)SHCIAEVEK(D)	2	10.12	82.4	18200000	1.94	536.81	1072.51	5.38
(K)QTALVELLK(H)	2	10.07	89.2	82400000	21.86	507.83	1014.62	6
(K)AEFVEVTK(L)	2	10	85.7	59100000	4.38	461.77	922.488	4.53
(K)DAIPENLPPLTADFAEDK(D)	2	9.88	94.4	12500000	30.48	978.49	1955.96	3.77
(K)LFTFHADICTLPDTEK(Q)	2	9.87	97.6	26400000	25.41	954.53	1907.92	4.54
(K)SHCIAEVEKDAIPENLPPLTADFAEDK(D)	4	9.8	94.3	3410000	29.98	753.46	3009.45	4.19
(K)DDPHACYSTVFDK(L)	3	9.58	64.1	77800000	16.27	518.98	1554.65	4.41
(K)ECCHGDLLECADDR(A)	2	9.5	100	18600000	11.28	875.7	1749.66	4.1
(K)DAFLGSFLYEYSR(R)	2	9.32	94	1680000	37.13	784.34	1567.74	4.37
(K)KQTALVELLK(H)	2	8.76	81.5	5610000	17.56	571.96	1142.71	8.59
(K)YNGVFQECCQAEDK(G)	2	8.03	79.6	19400000	15.91	875.29	1747.7	4.14
(R)RHPEYAVSVLLR(L)	2	8.01	93.1	5530000	17.81	720.46	1439.81	8.75
(K)CCAADDKEACFAVEGPK(L)	2	7.98	64.6	13900000	14.24	964.45	1927.8	4.32
(R)RPCFSALTPDETYVPK(A)	2	7.94	76.1	51200000	21.57	941.1	1880.92	6.07
(K)YNGVFQECCQAEDK(G)	2	7.86	95.2	135000000	13.93	874.53	1747.7	4.14
(R)MPCTEDYLSLILNR(L)	2	7.64	82.8	76400000	36.38	863.02	1724.84	4.37
(K)YICDNQDTISSK(L)	2	7.38	87	2080000	6.52	722.26	1443.64	4.21
(K)YLYEIAR(R)	2	7.2	97.1	86500000	14.06	464.29	927.493	6
(K)DAIPENLPPLTADFAEDKDVCK(N)	3	6.86	94.9	211000000	27.79	820.14	2458.18	3.96

## Sheet: 0 site-free digestion-03
Accession	Protein name	Species	Protein MW(Da)	Coverage (%)	Spectra	Unique peptides	MS/MS Search (score)	Mean peptide Spectral Intensity
P02769	serum albumin	BOVIN	71289	56	46	29	356.91	61800000
Sequence	z	Score	SPI	Spectrum	RT	m/z	MH+	Peptide pI
			(%)	Intensity	(min)	Measured	Matched
						(Da)	(Da)
(K)LGEYGFQNALIVR(Y)	2	19.33	96.5	430000000	42.65	740.35	1479.8	6
(K)GLVLIAFSQYLQQCPFDEHVK(L)	4	17.76	88.2	20600000	59.6	623.98	2492.26	5.32
(K)LGEYGFQNALIVR(Y)	3	17.17	85.6	6370000	43.58	493.96	1479.8	6
(K)LKPDPNTLCDEFK(A)	3	17.04	95.6	23800000	33.93	526.49	1576.77	4.56
(R)MPCTEDYLSLILNR(L)	3	16.84	96.8	24000000	53.6	575.69	1724.84	4.37
(K)DAFLGSFLYEYSR(R)	2	16.45	87.9	131000000	52.87	784.71	1567.74	4.37
(K)SHCIAEVEK(D)	2	16.28	89.9	4100000	10.81	536.71	1072.51	5.38
(K)TVMENFVAFVDK(C)	2	15.24	91.8	199000000	50.54	700.48	1399.69	4.37
(K)TCVADESHAGCEK(S)	3	15.17	88.3	23400000	4.04	488.61	1463.59	4.65
(K)SLHTLFGDELCK(V)	2	14.81	86	101000000	39.26	710.31	1419.69	5.3
(K)LFTFHADICTLPDTEK(Q)	2	14.52	81.9	81800000	43.18	954.48	1907.92	4.54
(R)MPCTEDYLSLILNR(L)	2	14.17	85.2	187000000	53.57	863.16	1724.84	4.37
(K)SLHTLFGDELCK(V)	3	13.33	83.7	56000000	39.24	473.92	1419.69	5.3
(R)RPCFSALTPDETYVPK(A)	3	13.17	65.5	99200000	36.95	627.9	1880.92	6.07
(K)YNGVFQECCQAEDK(G)	3	13.03	74.9	34000000	27.88	583.28	1747.7	4.14
(K)EYEATLEECCAK(D)	2	12.95	86.3	120000000	24.94	751.89	1502.61	4.09
(K)ECCHGDLLECADDR(A)	3	12.95	88.8	35800000	27.35	584.03	1749.66	4.1
(K)ECCHGDLLECADDR(A)	2	12.66	82.4	109000000	27.25	875.32	1749.66	4.1
(R)HPYFYAPELLYYANK(Y)	3	12.5	100	26700000	48.94	630.42	1888.93	6.75
(K)LVNELTEFAK(T)	2	11.98	85.8	124000000	37.92	582.36	1163.63	4.53
(K)HLVDEPQNLIK(Q)	2	11.66	96.5	94000000	31.54	653.39	1305.72	5.32
(K)LKPDPNTLCDEFK(A)	2	11.57	84.4	50900000	33.84	788.88	1576.77	4.56
(K)QNCDQFEK(L)	2	11.32	85.9	6640000	6.79	534.89	1068.44	4.37
(K)TCVADESHAGCEK(S)	2	11	100	47500000	4.01	732.46	1463.59	4.65
(K)GACLLPK(I)	2	10.66	88.3	9200000	24.88	379.71	758.423	8.75
(K)LFTFHADICTLPDTEK(Q)	3	10.27	76.5	200000000	43.15	636.88	1907.92	4.54
(R)CCTKPESER(M)	3	10.21	64.8	498000	2.23	389.6	1166.49	6.14
(K)TVmENFVAFVDK(C)	2	9.76	62.4	6420000	42.55	708.29	1399.69	4.37
(K)ECCDKPLLEK(S)	2	9.75	85.3	3670000	19.69	646.72	1291.6	4.68
(K)CCTESLVNR(R)	2	9.54	83.4	8710000	19.48	569.86	1138.5	6
(K)DLGEEHFK(G)	2	9.4	83.7	3180000	21.27	487.71	974.458	4.65
(R)RPCFSALTPDETYVPK(A)	3	9.15	69.3	99200000	37.04	627.86	1880.92	6.07
(K)YNGVFQECCQAEDK(G)	3	9.06	72.1	33800000	27.77	583.26	1747.7	4.14
(K)DAFLGSFLYEYSR(R)	2	8.52	68	10800000	54.55	783.61	1567.74	4.37
(R)HPYFYAPELLYYANK(Y)	2	8.4	62.3	30900000	48.97	944.96	1888.93	6.75
(K)TCVADESHAGCEK(S)	2	8	100	47600000	4.11	732.46	1463.59	4.65
(K)DDSPDLPK(L)	2	7.81	74.2	2470000	18.35	443.62	886.415	3.93
(K)YLYEIAR(R)	2	7.69	96.4	49800000	31.03	464.23	927.493	6
(R)RPCFSALTPDETYVPK(A)	2	7.62	61.4	105000000	36.98	940.99	1880.92	6.07
(R)LCVLHEK(T)	2	7.61	62.2	8530000	19.29	449.84	898.481	6.75
(K)TVmENFVAFVDK(C)	2	7.55	76.7	6290000	42.68	708.36	1399.69	4.37
(K)YNGVFQECCQAEDK(G)	2	7.53	67.7	112000000	27.85	874.56	1747.7	4.14
(K)DAIPENLPPLTADFAEDK(D)	2	7.43	96.5	4130000	45.91	978.34	1955.96	3.77
(R)ETYGDMADCCEK(Q)	2	7.39	71.2	34000000	21.88	739.96	1478.52	3.91
(K)QTALVELLK(H)	2	6.42	97.5	22000000	41.97	507.84	1014.62	6
(R)LCVLHEK(T)	2	6.06	70.3	8630000	19.93	449.74	898.481	6.75

## Sheet: 1 site-free digestion-03
Accession	Protein name	Species	Protein MW(Da)	Coverage (%)	Spectra	Unique peptides	MS/MS Search (score)	Mean peptide Spectral Intensity
P02769	serum albumin	BOVIN	71289	68.8	73	41	511.08	56600000
Sequence	z	Score	SPI	Spectrum	RT	m/z	MH+	Peptide pI
			(%)	Intensity	(min)	Measured	Matched
						(Da)	(Da)
(R)RHPYFYAPELLYYANK(Y)	3	19.92	92.7	42600000	46.11	682.61	2045.03	8.39
(K)LGEYGFQNALIVR(Y)	2	19.33	96.5	430000000	42.65	740.35	1479.8	6
(R)RHPEYAVSVLLR(L)	3	18.59	91.6	34100000	36.4	480.81	1439.81	8.75
(K)GLVLIAFSQYLQQCPFDEHVK(L)	4	17.76	88.2	20600000	59.6	623.98	2492.26	5.32
(K)CCAADDKEACFAVEGPK(L)	3	17.25	93.7	30800000	27.95	643.5	1927.8	4.32
(K)LGEYGFQNALIVR(Y)	3	17.17	85.6	6370000	43.58	493.96	1479.8	6
(K)LKPDPNTLCDEFK(A)	3	17.04	95.6	23800000	33.93	526.49	1576.77	4.56
(R)MPCTEDYLSLILNR(L)	3	16.84	96.8	24000000	53.6	575.69	1724.84	4.37
(K)DAFLGSFLYEYSR(R)	2	16.45	87.9	131000000	52.87	784.71	1567.74	4.37
(K)SHCIAEVEK(D)	2	16.28	89.9	4100000	10.81	536.71	1072.51	5.38
(R)RHPYFYAPELLYYANK(Y)	4	15.99	94.1	14100000	46.3	512.14	2045.03	8.39
(K)CCAADDKEACFAVEGPK(L)	3	15.36	73.3	30800000	28.04	643.51	1927.8	4.32
(R)KVPQVSTPTLVEVSR(S)	3	15.26	85.9	84800000	34.22	547.41	1639.94	8.75
(K)TVMENFVAFVDK(C)	2	15.24	91.8	199000000	50.54	700.48	1399.69	4.37
(K)TCVADESHAGCEK(S)	3	15.17	88.3	23400000	4.04	488.61	1463.59	4.65
(K)SLHTLFGDELCK(V)	2	14.81	86	101000000	39.26	710.31	1419.69	5.3
(K)LKECCDKPLLEK(S)	2	14.69	85.9	27400000	22.11	767.84	1532.78	6.18
(K)LFTFHADICTLPDTEK(Q)	2	14.52	81.9	81800000	43.18	954.48	1907.92	4.54
(R)MPCTEDYLSLILNR(L)	2	14.17	85.2	187000000	53.57	863.16	1724.84	4.37
(R)RHPYFYAPELLYYANK(Y)	2	13.97	82.6	30000000	46.21	1023.07	2045.03	8.39
(K)SLHTLFGDELCK(V)	3	13.33	83.7	56000000	39.24	473.92	1419.69	5.3
(R)RPCFSALTPDETYVPK(A)	3	13.17	65.5	99200000	36.95	627.9	1880.92	6.07
(K)LKECCDKPLLEK(S)	4	13.08	80.7	8060000	22.08	384.54	1532.78	6.18
(K)YNGVFQECCQAEDK(G)	3	13.03	74.9	34000000	27.88	583.28	1747.7	4.14
(R)FKDLGEEHFK(G)	3	12.96	80.5	9140000	25.79	417.74	1249.62	5.44
(K)EYEATLEECCAK(D)	2	12.95	86.3	120000000	24.94	751.89	1502.61	4.09
(K)ECCHGDLLECADDR(A)	3	12.95	88.8	35800000	27.35	584.03	1749.66	4.1
(K)ECCHGDLLECADDR(A)	2	12.66	82.4	109000000	27.25	875.32	1749.66	4.1
(R)HPYFYAPELLYYANK(Y)	3	12.5	100	26700000	48.94	630.42	1888.93	6.75
(K)DAIPENLPPLTADFAEDKDVCK(N)	2	12.47	84.6	8540000	44.53	1230.16	2458.18	3.96
(K)LVNELTEFAK(T)	2	11.98	85.8	124000000	37.92	582.36	1163.63	4.53
(K)CCAADDKEACFAVEGPK(L)	3	11.82	86.5	28600000	28.83	643.52	1927.8	4.32
(K)HLVDEPQNLIK(Q)	2	11.66	96.5	94000000	31.54	653.39	1305.72	5.32
(K)LKPDPNTLCDEFK(A)	2	11.57	84.4	50900000	33.84	788.88	1576.77	4.56
(K)QNCDQFEK(L)	2	11.32	85.9	6640000	6.79	534.89	1068.44	4.37
(K)DAIPENLPPLTADFAEDKDVCK(N)	4	11.04	88	9030000	44.45	615.65	2458.18	3.96
(K)TCVADESHAGCEK(S)	2	11	100	47500000	4.01	732.46	1463.59	4.65
(K)GACLLPK(I)	2	10.66	88.3	9200000	24.88	379.71	758.423	8.75
(R)FKDLGEEHFK(G)	2	10.59	83.9	8370000	25.88	625.28	1249.62	5.44
(R)RHPYFYAPELLYYANK(Y)	2	10.38	92.2	29700000	46.27	1022.96	2045.03	8.39
(K)LFTFHADICTLPDTEK(Q)	3	10.27	76.5	200000000	43.15	636.88	1907.92	4.54
(R)CCTKPESER(M)	3	10.21	64.8	498000	2.23	389.6	1166.49	6.14
(K)ECCHGDLLECADDRADLAK(Y)	3	10.03	79.6	46600000	31.83	750.28	2247.94	4.23
(K)LKPDPNTLCDEFKADEK(K)	3	9.82	90.7	29700000	34.58	674.53	2019.97	4.44
(K)TVmENFVAFVDK(C)	2	9.76	62.4	6420000	42.55	708.29	1399.69	4.37
(K)ECCDKPLLEK(S)	2	9.75	85.3	3670000	19.69	646.72	1291.6	4.68
(K)CCTESLVNR(R)	2	9.54	83.4	8710000	19.48	569.86	1138.5	6
(K)DLGEEHFK(G)	2	9.4	83.7	3180000	21.27	487.71	974.458	4.65
(K)ECCHGDLLECADDRADLAK(Y)	4	9.31	83.3	26000000	31.96	563.27	2247.94	4.23
(R)RPCFSALTPDETYVPK(A)	3	9.15	69.3	99200000	37.04	627.86	1880.92	6.07
(K)YNGVFQECCQAEDK(G)	3	9.06	72.1	33800000	27.77	583.26	1747.7	4.14
(K)LKECCDKPLLEK(S)	3	8.64	89.8	9770000	22.49	512.18	1532.78	6.18
(K)DAFLGSFLYEYSR(R)	2	8.52	68	10800000	54.55	783.61	1567.74	4.37
(R)RHPEYAVSVLLR(L)	2	8.45	78.7	68000000	36.47	720.51	1439.81	8.75
(R)HPYFYAPELLYYANK(Y)	2	8.4	62.3	30900000	48.97	944.96	1888.93	6.75
(K)KQTALVELLK(H)	2	8.18	92.8	27700000	37.62	571.89	1142.71	8.59
(R)NECFLSHKDDSPDLPK(L)	3	8.13	83.7	14700000	29.63	634.82	1901.87	4.66
(K)TCVADESHAGCEK(S)	2	8	100	47600000	4.11	732.46	1463.59	4.65
(K)DDSPDLPK(L)	2	7.81	74.2	2470000	18.35	443.62	886.415	3.93
(K)YLYEIAR(R)	2	7.69	96.4	49800000	31.03	464.23	927.493	6
(R)RPCFSALTPDETYVPK(A)	2	7.62	61.4	105000000	36.98	940.99	1880.92	6.07
(R)LCVLHEK(T)	2	7.61	62.2	8530000	19.29	449.84	898.481	6.75
(K)TVmENFVAFVDK(C)	2	7.55	76.7	6290000	42.68	708.36	1399.69	4.37
(K)YNGVFQECCQAEDK(G)	2	7.53	67.7	112000000	27.85	874.56	1747.7	4.14
(K)DAIPENLPPLTADFAEDK(D)	2	7.43	96.5	4130000	45.91	978.34	1955.96	3.77
(R)ETYGDMADCCEK(Q)	2	7.39	71.2	34000000	21.88	739.96	1478.52	3.91
(R)KVPQVSTPTLVEVSR(S)	2	7.37	67	215000000	34.1	820.53	1639.94	8.75
(R)KVPQVSTPTLVEVSR(S)	2	7.15	90.4	218000000	34.19	820.65	1639.94	8.75
(K)LVTDLTK(V)	2	6.87	95.1	13900000	21.9	395.26	789.472	5.84
(K)CCAADDKEACFAVEGPK(L)	2	6.58	89.1	23800000	28.07	964.44	1927.8	4.32
(K)QTALVELLK(H)	2	6.42	97.5	22000000	41.97	507.84	1014.62	6
(K)LFTFHADICTLPDTEK(Q)	3	6.29	63	200000000	43.25	636.85	1907.92	4.54
(R)LCVLHEK(T)	2	6.06	70.3	8630000	19.93	449.74	898.481	6.75

## Sheet: 2 site-free digestion-03
Accession	Protein name	Species	Protein MW(Da)	Coverage (%)	Spectra	Unique peptides	MS/MS Search (score)	Mean peptide Spectral Intensity
P02769	serum albumin	BOVIN	71289	69	73	41	510.53	56200000
Sequence	z	Score	SPI	Spectrum	RT	m/z	MH+	Peptide pI
			(%)	Intensity	(min)	Measured	Matched
						(Da)	(Da)
(R)RHPYFYAPELLYYANK(Y)	3	19.92	92.7	42600000	46.11	682.61	2045.03	8.39
(K)LGEYGFQNALIVR(Y)	2	19.33	96.5	430000000	42.65	740.35	1479.8	6
(R)RHPEYAVSVLLR(L)	3	18.59	91.6	34100000	36.4	480.81	1439.81	8.75
(K)GLVLIAFSQYLQQCPFDEHVK(L)	4	17.76	88.2	20600000	59.6	623.98	2492.26	5.32
(K)CCAADDKEACFAVEGPK(L)	3	17.25	93.7	30800000	27.95	643.5	1927.8	4.32
(K)LGEYGFQNALIVR(Y)	3	17.17	85.6	6370000	43.58	493.96	1479.8	6
(K)LKPDPNTLCDEFK(A)	3	17.04	95.6	23800000	33.93	526.49	1576.77	4.56
(R)MPCTEDYLSLILNR(L)	3	16.84	96.8	24000000	53.6	575.69	1724.84	4.37
(K)DAFLGSFLYEYSR(R)	2	16.45	87.9	131000000	52.87	784.71	1567.74	4.37
(K)SHCIAEVEK(D)	2	16.28	89.9	4100000	10.81	536.71	1072.51	5.38
(R)RHPYFYAPELLYYANK(Y)	4	15.99	94.1	14100000	46.3	512.14	2045.03	8.39
(K)CCAADDKEACFAVEGPK(L)	3	15.36	73.3	30800000	28.04	643.51	1927.8	4.32
(R)KVPQVSTPTLVEVSR(S)	3	15.26	85.9	84800000	34.22	547.41	1639.94	8.75
(K)TVMENFVAFVDK(C)	2	15.24	91.8	199000000	50.54	700.48	1399.69	4.37
(K)TCVADESHAGCEK(S)	3	15.17	88.3	23400000	4.04	488.61	1463.59	4.65
(K)SLHTLFGDELCK(V)	2	14.81	86	101000000	39.26	710.31	1419.69	5.3
(K)LKECCDKPLLEK(S)	2	14.69	85.9	27400000	22.11	767.84	1532.78	6.18
(K)LFTFHADICTLPDTEK(Q)	2	14.52	81.9	81800000	43.18	954.48	1907.92	4.54
(R)MPCTEDYLSLILNR(L)	2	14.17	85.2	187000000	53.57	863.16	1724.84	4.37
(R)RHPYFYAPELLYYANK(Y)	2	13.97	82.6	30000000	46.21	1023.07	2045.03	8.39
(K)SLHTLFGDELCK(V)	3	13.33	83.7	56000000	39.24	473.92	1419.69	5.3
(R)RPCFSALTPDETYVPK(A)	3	13.17	65.5	99200000	36.95	627.9	1880.92	6.07
(K)LKECCDKPLLEK(S)	4	13.08	80.7	8060000	22.08	384.54	1532.78	6.18
(K)YNGVFQECCQAEDK(G)	3	13.03	74.9	34000000	27.88	583.28	1747.7	4.14
(R)FKDLGEEHFK(G)	3	12.96	80.5	9140000	25.79	417.74	1249.62	5.44
(K)EYEATLEECCAK(D)	2	12.95	86.3	120000000	24.94	751.89	1502.61	4.09
(K)ECCHGDLLECADDR(A)	3	12.95	88.8	35800000	27.35	584.03	1749.66	4.1
(K)ECCHGDLLECADDR(A)	2	12.66	82.4	109000000	27.25	875.32	1749.66	4.1
(R)HPYFYAPELLYYANK(Y)	3	12.5	100	26700000	48.94	630.42	1888.93	6.75
(K)DAIPENLPPLTADFAEDKDVCK(N)	2	12.47	84.6	8540000	44.53	1230.16	2458.18	3.96
(K)LVNELTEFAK(T)	2	11.98	85.8	124000000	37.92	582.36	1163.63	4.53
(K)CCAADDKEACFAVEGPK(L)	3	11.82	86.5	28600000	28.83	643.52	1927.8	4.32
(K)HLVDEPQNLIK(Q)	2	11.66	96.5	94000000	31.54	653.39	1305.72	5.32
(K)LKPDPNTLCDEFK(A)	2	11.57	84.4	50900000	33.84	788.88	1576.77	4.56
(K)QNCDQFEK(L)	2	11.32	85.9	6640000	6.79	534.89	1068.44	4.37
(K)DAIPENLPPLTADFAEDKDVCK(N)	4	11.04	88	9030000	44.45	615.65	2458.18	3.96
(K)TCVADESHAGCEK(S)	2	11	100	47500000	4.01	732.46	1463.59	4.65
(K)GACLLPK(I)	2	10.66	88.3	9200000	24.88	379.71	758.423	8.75
(R)FKDLGEEHFK(G)	2	10.59	83.9	8370000	25.88	625.28	1249.62	5.44
(R)RHPYFYAPELLYYANK(Y)	2	10.38	92.2	29700000	46.27	1022.96	2045.03	8.39
(K)LFTFHADICTLPDTEK(Q)	3	10.27	76.5	200000000	43.15	636.88	1907.92	4.54
(R)CCTKPESER(M)	3	10.21	64.8	498000	2.23	389.6	1166.49	6.14
(K)ECCHGDLLECADDRADLAK(Y)	3	10.03	79.6	46600000	31.83	750.28	2247.94	4.23
(K)TVmENFVAFVDK(C)	2	9.76	62.4	6420000	42.55	708.29	1399.69	4.37
(K)ECCDKPLLEK(S)	2	9.75	85.3	3670000	19.69	646.72	1291.6	4.68
(K)CCTESLVNR(R)	2	9.54	83.4	8710000	19.48	569.86	1138.5	6
(K)DLGEEHFK(G)	2	9.4	83.7	3180000	21.27	487.71	974.458	4.65
(K)ECCHGDLLECADDRADLAK(Y)	4	9.31	83.3	26000000	31.96	563.27	2247.94	4.23
(K)KFWGK(Y)	2	9.27	87.7	1830000	18.85	333.21	665.377	10
(R)RPCFSALTPDETYVPK(A)	3	9.15	69.3	99200000	37.04	627.86	1880.92	6.07
(K)YNGVFQECCQAEDK(G)	3	9.06	72.1	33800000	27.77	583.26	1747.7	4.14
(K)LKECCDKPLLEK(S)	3	8.64	89.8	9770000	22.49	512.18	1532.78	6.18
(K)DAFLGSFLYEYSR(R)	2	8.52	68	10800000	54.55	783.61	1567.74	4.37
(R)RHPEYAVSVLLR(L)	2	8.45	78.7	68000000	36.47	720.51	1439.81	8.75
(R)HPYFYAPELLYYANK(Y)	2	8.4	62.3	30900000	48.97	944.96	1888.93	6.75
(K)KQTALVELLK(H)	2	8.18	92.8	27700000	37.62	571.89	1142.71	8.59
(R)NECFLSHKDDSPDLPK(L)	3	8.13	83.7	14700000	29.63	634.82	1901.87	4.66
(K)TCVADESHAGCEK(S)	2	8	100	47600000	4.11	732.46	1463.59	4.65
(K)DDSPDLPK(L)	2	7.81	74.2	2470000	18.35	443.62	886.415	3.93
(K)YLYEIAR(R)	2	7.69	96.4	49800000	31.03	464.23	927.493	6
(R)RPCFSALTPDETYVPK(A)	2	7.62	61.4	105000000	36.98	940.99	1880.92	6.07
(R)LCVLHEK(T)	2	7.61	62.2	8530000	19.29	449.84	898.481	6.75
(K)TVmENFVAFVDK(C)	2	7.55	76.7	6290000	42.68	708.36	1399.69	4.37
(K)YNGVFQECCQAEDK(G)	2	7.53	67.7	112000000	27.85	874.56	1747.7	4.14
(K)DAIPENLPPLTADFAEDK(D)	2	7.43	96.5	4130000	45.91	978.34	1955.96	3.77
(R)ETYGDMADCCEK(Q)	2	7.39	71.2	34000000	21.88	739.96	1478.52	3.91
(R)KVPQVSTPTLVEVSR(S)	2	7.37	67	215000000	34.1	820.53	1639.94	8.75
(R)KVPQVSTPTLVEVSR(S)	2	7.15	90.4	218000000	34.19	820.65	1639.94	8.75
(K)LVTDLTK(V)	2	6.87	95.1	13900000	21.9	395.26	789.472	5.84
(K)CCAADDKEACFAVEGPK(L)	2	6.58	89.1	23800000	28.07	964.44	1927.8	4.32
(K)QTALVELLK(H)	2	6.42	97.5	22000000	41.97	507.84	1014.62	6
(K)LFTFHADICTLPDTEK(Q)	3	6.29	63	200000000	43.25	636.85	1907.92	4.54
(R)LCVLHEK(T)	2	6.06	70.3	8630000	19.93	449.74	898.481	6.75
