# Supplementary material for: Preparation of trypsin aptamer modified silica particles by surface initiated atom transfer radical polymerization for proteome identification
Source: Royal Society of Chemistry journal article supplement (doi:10.1039/c5ay02080h), 2016-01-01
Supplement: c5ay02080h2.xlsx [file c5ay02080h2.xlsx]

## Sheet: TAMSP
Accession	Spectra	Unique peptide	MS/MS score	coverage%	Protein (MW)	Protein PI	Species	Protein Name
P02768	44	17	275.26	36.1	71362.3	5.92	HUMAN	Serum albumin
P01023	23	15	208.92	13.5	164714	6.03	HUMAN	Alpha-2-macroglobulin
P20742	5	3	41.07	2.3	165343	5.97	HUMAN	Pregnancy zone protein
P02647	15	10	160.08	39.7	30777.3	5.56	HUMAN	Apolipoprotein A-I
P01009	12	7	103.81	22.2	46906.8	5.37	HUMAN	Alpha-1-antitrypsin
P01024	7	6	76.31	6.4	188685	6.02	HUMAN	Complement C3
P02787	5	5	59.45	8.3	79344.7	6.86	HUMAN	Serotransferrin
P02790	6	4	52.31	9.7	52417.1	6.55	HUMAN	Hemopexin
P01871	5	4	50.27	12.3	49990.3	6.35	HUMAN	Ig mu chain C region
P04220	3	2	26.94	7.9	43570	5.12	HUMAN	Ig mu heavy chain disease protein
P01876	3	3	42.41	11.8	38509.8	6.08	HUMAN	Ig alpha-1 chain C region
P01877	2	2	30.04	7.9	37324.4	5.72	HUMAN	Ig alpha-2 chain C region
P00450	3	3	42.04	3.3	123059	5.44	HUMAN	Ceruloplasmin
P19823	3	3	39.31	3.4	106918	6.4	HUMAN	Inter-alpha-trypsin inhibitor heavy chain H2
P0C0L4	2	2	37.73	2.3	194365	6.66	HUMAN	Complement C4-A
P0C0L5	2	2	37.73	2.3	194330	6.74	HUMAN	Complement C4-B
P01834	7	2	34.26	32	11779.8	5.58	HUMAN	Ig kappa chain C region
P02656	2	2	33.66	27.2	10852.1	5.23	HUMAN	Apolipoprotein C-III
A0M8Q6	3	2	30.79	32	11473.6	8.94	HUMAN	Ig lambda-7 chain C region
P0CG05	3	2	30.79	32	11464.5	6.94	HUMAN	Ig lambda-2 chain C regions
P0CF74	3	2	30.79	32	11447.5	6.94	HUMAN	Ig lambda-6 chain C region
P0CG06	3	2	30.79	32	11408.5	6.94	HUMAN	Ig lambda-3 chain C regions
B9A064	1	1	16.73	7	23405.2	9.65	HUMAN	Immunoglobulin lambda-like polypeptide 5
P0CG04	1	1	16.73	14.1	11518.6	8.17	HUMAN	Ig lambda-1 chain C regions
P00738	4	2	28.33	5.4	45889.1	6.13	HUMAN	Haptoglobin
P68871	3	2	25.24	15.6	16112.2	6.75	HUMAN	Hemoglobin subunit beta
P10909	2	2	23.79	6.4	53064.2	5.89	HUMAN	Clusterin
P06310	1	1	17.76	9.7	14820.6	9.69	HUMAN	Ig kappa chain V-II region RPMI 6410
P01614	1	1	17.76	11.3	12790.1	5.27	HUMAN	Ig kappa chain V-II region Cum
P06309	1	1	17.76	11.1	12778	6.78	HUMAN	Ig kappa chain V-II region GM607 (Fragment)
P01617	1	1	17.76	11.5	12430.8	4.97	HUMAN	Ig kappa chain V-II region TEW
P02766	2	2	17.25	25.1	16000.8	5.52	HUMAN	Transthyretin
P06727	1	1	16.6	3.2	45398.2	5.28	HUMAN	Apolipoprotein A-IV
P01857	1	1	15.4	4.2	36618.7	8.92	HUMAN	Ig gamma-1 chain C region
P04206	1	1	15.37	15.5	11944.2	9.69	HUMAN	Ig kappa chain V-III region GOL
P01622	1	1	15.37	15.5	11902	9.17	HUMAN	Ig kappa chain V-III region Ti
P01620	1	1	15.37	15.5	11889	9.11	HUMAN	Ig kappa chain V-III region SIE
P01623	1	1	15.37	15.5	11860	9.46	HUMAN	Ig kappa chain V-III region WOL
P01011	1	1	13.19	2.6	47821.2	5.33	HUMAN	Alpha-1-antichymotrypsin
P01766	2	1	12.56	15	13340.6	6.46	HUMAN	Ig heavy chain V-III region BRO
P01777	2	1	12.56	15.1	12917.3	6.88	HUMAN	Ig heavy chain V-III region TEI
P02788	1	1	12.24	1.2	80063.3	9.24	HUMAN	Lactotransferrin

## Sheet: free-trypsin
Accession	Spectra	Unique peptide	MS/MS score	coverage%	Protein (MW)	Protein PI	Species	Protein Name
P02768	38	14	220.42	32.6	71362.3	5.92	HUMAN	Serum albumin
P01023	17	13	171.42	11.9	164714	6.03	HUMAN	Alpha-2-macroglobulin
P20742	3	3	33.78	2.3	165343	5.97	HUMAN	Pregnancy zone protein
P02647	15	10	138.17	38.9	30777.3	5.56	HUMAN	Apolipoprotein A-I
P01009	5	4	60.35	12.4	46906.8	5.37	HUMAN	Alpha-1-antitrypsin
P01024	3	3	39.66	3.2	188685	6.02	HUMAN	Complement C3
P01871	3	3	29.72	9.5	49990.3	6.35	HUMAN	Ig mu chain C region
P04220	2	2	18.99	7.9	43570	5.12	HUMAN	Ig mu heavy chain disease protein
P04004	2	2	26.77	5.6	55103.4	5.55	HUMAN	Vitronectin
P01857	2	2	26.43	9	36618.7	8.92	HUMAN	Ig gamma-1 chain C region
P68871	3	2	25.9	15.6	16112.2	6.75	HUMAN	Hemoglobin subunit beta
A0M8Q6	4	2	25.77	32	11473.6	8.94	HUMAN	Ig lambda-7 chain C region
P0CG05	4	2	25.77	32	11464.5	6.94	HUMAN	Ig lambda-2 chain C regions
P0CF74	4	2	25.77	32	11447.5	6.94	HUMAN	Ig lambda-6 chain C region
P0CG06	4	2	25.77	32	11408.5	6.94	HUMAN	Ig lambda-3 chain C regions
B9A064	2	1	13.19	7	23405.2	9.65	HUMAN	Immunoglobulin lambda-like polypeptide 5
P0CG04	2	1	13.19	14.1	11518.6	8.17	HUMAN	Ig lambda-1 chain C regions
P00738	3	2	25.64	5.4	45889.1	6.13	HUMAN	Haptoglobin
P00739	1	1	12.41	3.4	39542.3	6.64	HUMAN	Haptoglobin-related protein
P19823	2	2	25.07	2.3	106918	6.4	HUMAN	Inter-alpha-trypsin inhibitor heavy chain H2
P02787	3	2	24.82	3.5	79344.7	6.86	HUMAN	Serotransferrin
P02790	2	2	22.64	5.8	52417.1	6.55	HUMAN	Hemopexin
P10909	2	2	21.86	7.7	53064.2	5.89	HUMAN	Clusterin
P02766	2	2	20.73	25.1	16000.8	5.52	HUMAN	Transthyretin
P01011	2	2	17.17	4.7	47821.2	5.33	HUMAN	Alpha-1-antichymotrypsin
P02656	1	1	15.94	16.1	10852.1	5.23	HUMAN	Apolipoprotein C-III
P01876	1	1	14.91	4.2	38509.8	6.08	HUMAN	Ig alpha-1 chain C region
P0C0L4	1	1	14.8	0.8	194365	6.66	HUMAN	Complement C4-A
P0C0L5	1	1	14.8	0.8	194330	6.74	HUMAN	Complement C4-B
P01834	4	1	12.8	16	11779.8	5.58	HUMAN	Ig kappa chain C region
P00450	1	1	12.22	1	123059	5.44	HUMAN	Ceruloplasmin
