# Supplementary material for: Preparation of trypsin aptamer modified silica particles by surface initiated atom transfer radical polymerization for proteome identification
Source: Royal Society of Chemistry journal article supplement (doi:10.1039/c5ay02080h), 2016-01-01
Supplement: c5ay02080h3.xlsx [file c5ay02080h3.xlsx]

## Sheet: 0 site-TAMSP ATRP before-01
Accession	Protein name	Species	Protein MW(Da)	Coverage (%)	Spectra	Unique peptides	MS/MS Search (score)	Mean peptide Spectral Intensity
P02769	serum albumin	BOVIN	71289	61.7	93	32	422.15	141000000
Sequence	z	Score	SPI	Spectrum	RT	m/z	MH+	Peptide pI
			(%)	Intensity	(min)	Measured	Matched
						(Da)	(Da)
(K)DAFLGSFLYEYSR(R)	2	19.83	96.8	1220000000	52.54	784.27	1567.74	4.37
(K)LGEYGFQNALIVR(Y)	2	19.36	97.6	2110000000	42.41	740.34	1479.8	6
(R)RPCFSALTPDETYVPK(A)	3	18.38	97	365000000	36.59	627.5	1880.92	6.07
(R)MPCTEDYLSLILNR(L)	3	18.07	93.8	77000000	53.35	575.76	1724.84	4.37
(K)DAFLGSFLYEYSR(R)	3	17.66	94.2	28400000	52.67	523.22	1567.74	4.37
(K)ECCHGDLLECADDR(A)	3	16.78	95.8	21400000	26.96	583.9	1749.66	4.1
(K)LVNELTEFAK(T)	2	16.65	94.6	954000000	36.18	582.31	1163.63	4.53
(K)LGEYGFQNALIVR(Y)	3	16.04	87.3	36500000	43.35	494.49	1479.8	6
(R)HPYFYAPELLYYANK(Y)	3	16.02	93.3	57900000	48.8	630.46	1888.93	6.75
(K)LKPDPNTLCDEFK(A)	2	15.79	92.7	176000000	33.56	788.79	1576.77	4.56
(K)SLHTLFGDELCK(V)	3	15.69	90.6	65600000	39.41	473.95	1419.69	5.3
(K)HLVDEPQNLIK(Q)	2	15.57	93.6	464000000	30.89	653.24	1305.72	5.32
(K)HLVDEPQNLIK(Q)	3	15.28	93	34500000	31.01	435.97	1305.72	5.32
(K)LVNELTEFAK(T)	2	15.15	94.6	909000000	37.41	582.28	1163.63	4.53
(K)LVVSTQTALA(-)	2	14.81	86.4	94800000	31.36	501.73	1002.58	5.52
(K)DAIPENLPPLTADFAEDK(D)	3	14.29	89.2	29300000	45.55	652.84	1955.96	3.77
(K)EACFAVEGPK(L)	2	14.03	92.1	32700000	25.81	553.11	1107.51	4.53
(K)AEFVEVTK(L)	2	13.86	91.1	262000000	22.63	461.64	922.488	4.53
(K)VPQVSTPTLVEVSR(S)	2	13.85	89.3	199000000	35.43	756.35	1511.84	5.97
(R)mPCTEDYLSLILNR(L)	2	13.7	89.1	13900000	51.39	870.77	1724.84	4.37
(K)TVMENFVAFVDK(C)	2	13.56	85	1170000000	50.32	700.29	1399.69	4.37
(K)DLGEEHFK(G)	2	13.53	90.2	15900000	8.51	487.57	974.458	4.65
(K)YICDNQDTISSK(L)	2	13.45	77.6	91100000	3.41	722.26	1443.64	4.21
(K)YICDNQDTISSK(L)	2	12.91	74.3	74500000	19.75	722.64	1443.64	4.21
(K)LFTFHADICTLPDTEK(Q)	3	12.83	75	387000000	42.88	636.83	1907.92	4.54
(K)DAFLGSFLYEYSR(R)	2	12.73	86	11500000	57.63	784.72	1567.74	4.37
(K)LKPDPNTLCDEFK(A)	3	12.5	91.1	90500000	33.94	526.55	1576.77	4.56
(K)SHCIAEVEK(D)	2	12.25	75	2020000	11.09	536.66	1072.51	5.38
(K)DLGEEHFK(G)	2	12.05	90.6	14600000	10.66	487.65	974.458	4.65
(K)GLVLIAFSQYLQQCPFDEHVK(L)	4	11.78	77.6	6800000	59.89	623.92	2492.26	5.32
(K)DLGEEHFK(G)	2	11.52	90.2	12000000	20.98	487.65	974.458	4.65
(K)TVmENFVAFVDK(C)	2	11.36	82.6	41000000	42.22	708.71	1399.69	4.37
(K)DDSPDLPK(L)	2	11.21	84.4	12700000	3.44	443.7	886.415	3.93
(R)LCVLHEK(T)	2	11.07	79.2	8740000	4.43	449.75	898.481	6.75
(R)ETYGDMADCCEK(Q)	2	10.99	75.1	10600000	10.8	739.65	1478.52	3.91
(R)ETYGDMADCCEK(Q)	2	10.93	90.6	19500000	22.21	739.69	1478.52	3.91
(K)DAIPENLPPLTADFAEDK(D)	2	10.86	94.1	59900000	45.52	978.73	1955.96	3.77
(K)TVmENFVAFVDK(C)	2	10.84	71.3	42500000	42.32	708.27	1399.69	4.37
(R)MPCTEDYLSLILNR(L)	2	10.81	82.4	583000000	53.32	862.98	1724.84	4.37
(K)EACFAVEGPK(L)	2	10.78	87.9	40500000	26.7	554.87	1107.51	4.53
(K)DAFLGSFLYEYSR(R)	2	10.53	73.5	23400000	55.6	784.2	1567.74	4.37
(K)DAFLGSFLYEYSR(R)	2	10.51	73.7	11200000	57.31	784.26	1567.74	4.37
(K)DAFLGSFLYEYSR(R)	2	10.41	63.8	10800000	58.07	784.6	1567.74	4.37
(K)DLGEEHFK(G)	2	10.13	93.8	7630000	11.31	487.83	974.458	4.65
(K)EYEATLEECCAK(D)	2	10.13	89.9	25300000	23.9	752.25	1502.61	4.09
(K)CCTESLVNR(R)	2	9.99	72.6	12800000	3.8	569.72	1138.5	6
(K)YNGVFQECCQAEDK(G)	2	9.79	77.3	48300000	27.63	874.24	1747.7	4.14
(K)DAFLGSFLYEYSR(R)	2	9.67	91.1	304000000	54.07	784.7	1567.74	4.37
(K)SLHTLFGDELCK(V)	2	9.43	77.9	164000000	39.39	710.3	1419.69	5.3
(R)ETYGDMADCCEK(Q)	2	9.29	87.6	12200000	8.79	739.58	1478.52	3.91
(K)DAFLGSFLYEYSR(R)	2	9.24	78.1	6360000	61.59	784.29	1567.74	4.37
(K)YICDNQDTISSK(L)	2	8.96	82.7	84400000	19.85	722.27	1443.64	4.21
(R)LCVLHEK(T)	2	8.75	68.2	4160000	19.55	449.66	898.481	6.75
(K)YICDNQDTISSK(L)	2	8.69	85.4	126000000	21.05	722.27	1443.64	4.21
(R)NECFLSHK(D)	2	8.67	67.5	8150000	6.36	517.78	1034.47	6.75
(K)DLGEEHFK(G)	2	8.62	75.2	1980000	13.02	487.69	974.458	4.65
(K)EYEATLEECCAK(D)	2	8.51	78.6	16600000	25.3	752.18	1502.61	4.09
(K)YICDNQDTISSK(L)	2	8.49	86.9	136000000	20.46	722.26	1443.64	4.21
(K)DDSPDLPK(L)	2	8.48	70	10900000	18.06	443.62	886.415	3.93
(K)CCTESLVNR(R)	2	8.47	82	10000000	19.35	569.64	1138.5	6
(R)HPYFYAPELLYYANK(Y)	2	8.45	85	46400000	48.83	944.95	1888.93	6.75
(K)AEFVEVTK(L)	2	8.44	82.3	108000000	24.73	461.78	922.488	4.53
(K)CCTESLVNR(R)	2	8.41	82.3	12500000	3.89	569.6	1138.5	6
(K)CCTESLVNR(R)	2	8.37	69.4	10400000	19.25	569.71	1138.5	6
(R)ETYGDMADCCEK(Q)	2	8.35	79.2	8440000	8.07	739.63	1478.52	3.91
(R)ETYGDMADCCEK(Q)	2	8.26	81	7480000	7.97	739.68	1478.52	3.91
(R)ETYGDMADCCEK(Q)	2	8.24	71.1	10900000	8.58	739.66	1478.52	3.91
(K)YLYEIAR(R)	2	8.21	97.4	267000000	30.6	464.23	927.493	6
(K)LFTFHADICTLPDTEK(Q)	2	8.16	81.2	113000000	43	954.4	1907.92	4.54
(R)MPCTEDYLSLILNR(L)	2	7.88	61.8	584000000	53.41	863.15	1724.84	4.37
(K)LVTDLTK(V)	2	7.71	97.5	56700000	19.78	395.21	789.472	5.84
(R)RPCFSALTPDETYVPK(A)	2	7.7	80.3	216000000	36.75	941.26	1880.92	6.07
(K)YICDNQDTISSK(L)	2	7.64	68	27800000	19.04	722.28	1443.64	4.21
(K)YICDNQDTISSK(L)	2	7.56	60.5	90900000	4.09	722.16	1443.64	4.21
(K)DLGEEHFK(G)	2	7.38	82.5	13200000	10.11	487.73	974.458	4.65
(K)DAFLGSFLYEYSR(R)	2	7.35	65.3	6490000	61.48	784.96	1567.74	4.37
(K)QTALVELLK(H)	2	7.2	91.1	276000000	41.41	507.75	1014.62	6
(K)EYEATLEECCAK(D)	2	7.1	69	17700000	25.21	752.57	1502.61	4.09
(K)DAFLGSFLYEYSR(R)	2	7.08	74.2	22700000	55.7	784.23	1567.74	4.37
(R)ETYGDMADCCEK(Q)	2	6.97	62.4	6400000	11.46	739.67	1478.52	3.91
(R)ETYGDMADCCEK(Q)	2	6.96	65.7	13100000	10.45	739.68	1478.52	3.91
(K)LVTDLTK(V)	2	6.87	94.5	25400000	17.43	395.3	789.472	5.84
(K)DDPHACYSTVFDK(L)	2	6.8	64.9	72800000	29.83	777.69	1554.65	4.41
(R)ETYGDMADCCEK(Q)	2	6.66	89.6	3670000	7.21	740.09	1478.52	3.91
(R)LCVLHEK(T)	2	6.62	72.4	4280000	19.38	449.72	898.481	6.75
(K)LVTDLTK(V)	2	6.62	91.4	55900000	20.66	395.17	789.472	5.84
(K)SHCIAEVEK(D)	2	6.43	64.6	3090000	10.23	536.74	1072.51	5.38
(K)DAFLGSFLYEYSR(R)	2	6.4	74.3	20300000	55.9	784.26	1567.74	4.37
(K)YICDNQDTISSK(L)	2	6.36	83.7	95800000	19.98	722.28	1443.64	4.21
(R)ETYGDMADCCEK(Q)	2	6.3	84.5	15200000	9.71	739.69	1478.52	3.91
(R)NECFLSHK(D)	2	6.28	61.9	9580000	6.25	517.69	1034.47	6.75
(K)DAFLGSFLYEYSR(R)	2	6.2	70.6	11200000	58.14	784.26	1567.74	4.37
(K)LVTDLTK(V)	2	6.16	94.1	48400000	15.47	395.27	789.472	5.84

## Sheet: 1 site-TAMSP ATRP before-01
Accession	Protein name	Species	Protein MW(Da)	Coverage (%)	Spectra	Unique peptides	MS/MS Search (score)	Mean peptide Spectral Intensity
P02769	serum albumin	BOVIN	71289	67.3	109	40	528.85	136000000
Sequence	z	Score	SPI	Spectrum	RT	m/z	MH+	Peptide pI
			(%)	Intensity	(min)	Measured	Matched
						(Da)	(Da)
(K)DAFLGSFLYEYSR(R)	2	19.83	96.8	1220000000	52.54	784.27	1567.74	4.37
(R)RHPEYAVSVLLR(L)	3	19.8	96.2	30900000	36.3	480.75	1439.81	8.75
(K)LGEYGFQNALIVR(Y)	2	19.36	97.6	2110000000	42.41	740.34	1479.8	6
(R)RPCFSALTPDETYVPK(A)	3	18.38	97	365000000	36.59	627.5	1880.92	6.07
(R)MPCTEDYLSLILNR(L)	3	18.07	93.8	77000000	53.35	575.76	1724.84	4.37
(K)DAFLGSFLYEYSR(R)	3	17.66	94.2	28400000	52.67	523.22	1567.74	4.37
(K)ECCHGDLLECADDR(A)	3	16.78	95.8	21400000	26.96	583.9	1749.66	4.1
(K)LVNELTEFAK(T)	2	16.65	94.6	954000000	36.18	582.31	1163.63	4.53
(K)LGEYGFQNALIVR(Y)	3	16.04	87.3	36500000	43.35	494.49	1479.8	6
(R)HPYFYAPELLYYANK(Y)	3	16.02	93.3	57900000	48.8	630.46	1888.93	6.75
(K)LKPDPNTLCDEFK(A)	2	15.79	92.7	176000000	33.56	788.79	1576.77	4.56
(K)SLHTLFGDELCK(V)	3	15.69	90.6	65600000	39.41	473.95	1419.69	5.3
(K)HLVDEPQNLIK(Q)	2	15.57	93.6	464000000	30.89	653.24	1305.72	5.32
(K)HLVDEPQNLIK(Q)	3	15.28	93	34500000	31.01	435.97	1305.72	5.32
(K)LVNELTEFAK(T)	2	15.15	94.6	909000000	37.41	582.28	1163.63	4.53
(K)LVVSTQTALA(-)	2	14.81	86.4	94800000	31.36	501.73	1002.58	5.52
(K)DAIPENLPPLTADFAEDK(D)	3	14.29	89.2	29300000	45.55	652.84	1955.96	3.77
(K)KQTALVELLK(H)	2	14.23	92.2	55800000	37.44	571.87	1142.71	8.59
(R)KVPQVSTPTLVEVSR(S)	3	14.13	73.5	385000000	33.66	547.42	1639.94	8.75
(K)EACFAVEGPK(L)	2	14.03	92.1	32700000	25.81	553.11	1107.51	4.53
(K)AEFVEVTK(L)	2	13.86	91.1	262000000	22.63	461.64	922.488	4.53
(K)VPQVSTPTLVEVSR(S)	2	13.85	89.3	199000000	35.43	756.35	1511.84	5.97
(R)mPCTEDYLSLILNR(L)	2	13.7	89.1	13900000	51.39	870.77	1724.84	4.37
(K)TVMENFVAFVDK(C)	2	13.56	85	1170000000	50.32	700.29	1399.69	4.37
(K)DLGEEHFK(G)	2	13.53	90.2	15900000	8.51	487.57	974.458	4.65
(K)YICDNQDTISSK(L)	2	13.45	77.6	91100000	3.41	722.26	1443.64	4.21
(K)YICDNQDTISSK(L)	2	12.91	74.3	74500000	19.75	722.64	1443.64	4.21
(K)LFTFHADICTLPDTEK(Q)	3	12.83	75	387000000	42.88	636.83	1907.92	4.54
(K)CCAADDKEACFAVEGPK(L)	3	12.76	77.8	21700000	27.86	643.28	1927.8	4.32
(K)DAFLGSFLYEYSR(R)	2	12.73	86	11500000	57.63	784.72	1567.74	4.37
(K)LKPDPNTLCDEFK(A)	3	12.5	91.1	90500000	33.94	526.55	1576.77	4.56
(R)FKDLGEEHFK(G)	3	12.44	71.6	10900000	25.62	417.4	1249.62	5.44
(K)SHCIAEVEK(D)	2	12.25	75	2020000	11.09	536.66	1072.51	5.38
(K)DLGEEHFK(G)	2	12.05	90.6	14600000	10.66	487.65	974.458	4.65
(K)GLVLIAFSQYLQQCPFDEHVK(L)	4	11.78	77.6	6800000	59.89	623.92	2492.26	5.32
(K)DAIPENLPPLTADFAEDKDVCK(N)	2	11.76	81	43400000	44.23	1230	2458.18	3.96
(R)KVPQVSTPTLVEVSR(S)	2	11.71	83.7	754000000	33.53	820.32	1639.94	8.75
(K)DLGEEHFK(G)	2	11.52	90.2	12000000	20.98	487.65	974.458	4.65
(K)GACLLPK(I)	2	11.41	78.1	14600000	22.02	379.74	758.423	8.75
(K)TVmENFVAFVDK(C)	2	11.36	82.6	41000000	42.22	708.71	1399.69	4.37
(K)DDSPDLPK(L)	2	11.21	84.4	12700000	3.44	443.7	886.415	3.93
(R)LCVLHEK(T)	2	11.07	79.2	8740000	4.43	449.75	898.481	6.75
(R)ETYGDMADCCEK(Q)	2	10.99	75.1	10600000	10.8	739.65	1478.52	3.91
(R)ETYGDMADCCEK(Q)	2	10.93	90.6	19500000	22.21	739.69	1478.52	3.91
(K)DAIPENLPPLTADFAEDK(D)	2	10.86	94.1	59900000	45.52	978.73	1955.96	3.77
(K)TVmENFVAFVDK(C)	2	10.84	71.3	42500000	42.32	708.27	1399.69	4.37
(R)MPCTEDYLSLILNR(L)	2	10.81	82.4	583000000	53.32	862.98	1724.84	4.37
(K)EACFAVEGPK(L)	2	10.78	87.9	40500000	26.7	554.87	1107.51	4.53
(K)DAFLGSFLYEYSR(R)	2	10.53	73.5	23400000	55.6	784.2	1567.74	4.37
(K)DAFLGSFLYEYSR(R)	2	10.51	73.7	11200000	57.31	784.26	1567.74	4.37
(K)DAFLGSFLYEYSR(R)	2	10.41	63.8	10800000	58.07	784.6	1567.74	4.37
(K)SHCIAEVEKDAIPENLPPLTADFAEDK(D)	4	10.17	89.4	44700000	45.91	753.28	3009.45	4.19
(R)FKDLGEEHFK(G)	3	10.14	67	11100000	25.33	417.23	1249.62	5.44
(K)DLGEEHFK(G)	2	10.13	93.8	7630000	11.31	487.83	974.458	4.65
(K)EYEATLEECCAK(D)	2	10.13	89.9	25300000	23.9	752.25	1502.61	4.09
(K)CCTESLVNR(R)	2	9.99	72.6	12800000	3.8	569.72	1138.5	6
(K)YNGVFQECCQAEDK(G)	2	9.79	77.3	48300000	27.63	874.24	1747.7	4.14
(K)DAFLGSFLYEYSR(R)	2	9.67	91.1	304000000	54.07	784.7	1567.74	4.37
(K)GACLLPK(I)	2	9.46	77.8	13500000	24.16	379.67	758.423	8.75
(K)SLHTLFGDELCK(V)	2	9.43	77.9	164000000	39.39	710.3	1419.69	5.3
(K)DDSPDLPK(L)	2	9.35	78.7	12400000	15.78	443.71	886.415	3.93
(R)ETYGDMADCCEK(Q)	2	9.29	87.6	12200000	8.79	739.58	1478.52	3.91
(K)DAFLGSFLYEYSR(R)	2	9.24	78.1	6360000	61.59	784.29	1567.74	4.37
(R)RHPEYAVSVLLR(L)	2	9.16	97.4	97800000	36.27	720.35	1439.81	8.75
(K)YICDNQDTISSK(L)	2	8.96	82.7	84400000	19.85	722.27	1443.64	4.21
(R)LCVLHEK(T)	2	8.75	68.2	4160000	19.55	449.66	898.481	6.75
(K)YICDNQDTISSK(L)	2	8.69	85.4	126000000	21.05	722.27	1443.64	4.21
(R)NECFLSHK(D)	2	8.67	67.5	8150000	6.36	517.78	1034.47	6.75
(K)DLGEEHFK(G)	2	8.62	75.2	1980000	13.02	487.69	974.458	4.65
(K)EYEATLEECCAK(D)	2	8.51	78.6	16600000	25.3	752.18	1502.61	4.09
(K)YICDNQDTISSK(L)	2	8.49	86.9	136000000	20.46	722.26	1443.64	4.21
(K)DDSPDLPK(L)	2	8.48	70	10900000	18.06	443.62	886.415	3.93
(K)CCTESLVNR(R)	2	8.47	82	10000000	19.35	569.64	1138.5	6
(R)HPYFYAPELLYYANK(Y)	2	8.45	85	46400000	48.83	944.95	1888.93	6.75
(K)AEFVEVTK(L)	2	8.44	82.3	108000000	24.73	461.78	922.488	4.53
(R)RHPEYAVSVLLR(L)	2	8.44	79.9	98700000	36.21	720.83	1439.81	8.75
(K)CCTESLVNR(R)	2	8.41	82.3	12500000	3.89	569.6	1138.5	6
(K)CCTESLVNR(R)	2	8.37	69.4	10400000	19.25	569.71	1138.5	6
(R)ETYGDMADCCEK(Q)	2	8.35	79.2	8440000	8.07	739.63	1478.52	3.91
(R)ETYGDMADCCEK(Q)	2	8.26	81	7480000	7.97	739.68	1478.52	3.91
(R)ETYGDMADCCEK(Q)	2	8.24	71.1	10900000	8.58	739.66	1478.52	3.91
(K)YLYEIAR(R)	2	8.21	97.4	267000000	30.6	464.23	927.493	6
(K)LFTFHADICTLPDTEK(Q)	2	8.16	81.2	113000000	43	954.4	1907.92	4.54
(R)MPCTEDYLSLILNR(L)	2	7.88	61.8	584000000	53.41	863.15	1724.84	4.37
(K)LVTDLTK(V)	2	7.71	97.5	56700000	19.78	395.21	789.472	5.84
(R)RPCFSALTPDETYVPK(A)	2	7.7	80.3	216000000	36.75	941.26	1880.92	6.07
(K)YICDNQDTISSK(L)	2	7.64	68	27800000	19.04	722.28	1443.64	4.21
(K)YICDNQDTISSK(L)	2	7.56	60.5	90900000	4.09	722.16	1443.64	4.21
(K)DLGEEHFK(G)	2	7.38	82.5	13200000	10.11	487.73	974.458	4.65
(K)DAFLGSFLYEYSR(R)	2	7.35	65.3	6490000	61.48	784.96	1567.74	4.37
(R)FKDLGEEHFK(G)	2	7.29	72.6	12600000	26.17	625.25	1249.62	5.44
(K)CCAADDKEACFAVEGPK(L)	3	7.21	77.1	21100000	28.05	643.56	1927.8	4.32
(K)QTALVELLK(H)	2	7.2	91.1	276000000	41.41	507.75	1014.62	6
(K)EYEATLEECCAK(D)	2	7.1	69	17700000	25.21	752.57	1502.61	4.09
(K)DAFLGSFLYEYSR(R)	2	7.08	74.2	22700000	55.7	784.23	1567.74	4.37
(R)ETYGDMADCCEK(Q)	2	6.97	62.4	6400000	11.46	739.67	1478.52	3.91
(R)ETYGDMADCCEK(Q)	2	6.96	65.7	13100000	10.45	739.68	1478.52	3.91
(K)LVTDLTK(V)	2	6.87	94.5	25400000	17.43	395.3	789.472	5.84
(K)DDPHACYSTVFDK(L)	2	6.8	64.9	72800000	29.83	777.69	1554.65	4.41
(R)ETYGDMADCCEK(Q)	2	6.66	89.6	3670000	7.21	740.09	1478.52	3.91
(R)LCVLHEK(T)	2	6.62	72.4	4280000	19.38	449.72	898.481	6.75
(K)LVTDLTK(V)	2	6.62	91.4	55900000	20.66	395.17	789.472	5.84
(K)SHCIAEVEK(D)	2	6.43	64.6	3090000	10.23	536.74	1072.51	5.38
(K)DAFLGSFLYEYSR(R)	2	6.4	74.3	20300000	55.9	784.26	1567.74	4.37
(K)YICDNQDTISSK(L)	2	6.36	83.7	95800000	19.98	722.28	1443.64	4.21
(R)ETYGDMADCCEK(Q)	2	6.3	84.5	15200000	9.71	739.69	1478.52	3.91
(K)DAFLGSFLYEYSR(R)	2	6.2	70.6	11200000	58.14	784.26	1567.74	4.37
(K)LVTDLTK(V)	2	6.19	95.9	74200000	14.86	395.22	789.472	5.84
(K)LVTDLTK(V)	2	6.16	94.1	48400000	15.47	395.27	789.472	5.84

## Sheet: 2 site-TAMSP ATRP before-01
Accession	Protein name	Species	Protein MW(Da)	Coverage (%)	Spectra	Unique peptides	MS/MS Search (score)	Mean peptide Spectral Intensity
P02769	serum albumin	BOVIN	71289	68.2	110	40	526.38	135000000
Sequence	z	Score	SPI	Spectrum	RT	m/z	MH+	Peptide pI
			(%)	Intensity	(min)	Measured	Matched
						(Da)	(Da)
(K)DAFLGSFLYEYSR(R)	2	19.83	96.8	1220000000	52.54	784.27	1567.74	4.37
(R)RHPEYAVSVLLR(L)	3	19.8	96.2	30900000	36.3	480.75	1439.81	8.75
(K)LGEYGFQNALIVR(Y)	2	19.36	97.6	2110000000	42.41	740.34	1479.8	6
(R)RPCFSALTPDETYVPK(A)	3	18.38	97	365000000	36.59	627.5	1880.92	6.07
(R)MPCTEDYLSLILNR(L)	3	18.07	93.8	77000000	53.35	575.76	1724.84	4.37
(K)DAFLGSFLYEYSR(R)	3	17.66	94.2	28400000	52.67	523.22	1567.74	4.37
(K)ECCHGDLLECADDR(A)	3	16.78	95.8	21400000	26.96	583.9	1749.66	4.1
(K)LVNELTEFAK(T)	2	16.65	94.6	954000000	36.18	582.31	1163.63	4.53
(K)LGEYGFQNALIVR(Y)	3	16.04	87.3	36500000	43.35	494.49	1479.8	6
(R)HPYFYAPELLYYANK(Y)	3	16.02	93.3	57900000	48.8	630.46	1888.93	6.75
(K)LKPDPNTLCDEFK(A)	2	15.79	92.7	176000000	33.56	788.79	1576.77	4.56
(K)SLHTLFGDELCK(V)	3	15.69	90.6	65600000	39.41	473.95	1419.69	5.3
(K)HLVDEPQNLIK(Q)	2	15.57	93.6	464000000	30.89	653.24	1305.72	5.32
(K)HLVDEPQNLIK(Q)	3	15.28	93	34500000	31.01	435.97	1305.72	5.32
(K)LVNELTEFAK(T)	2	15.15	94.6	909000000	37.41	582.28	1163.63	4.53
(K)LVVSTQTALA(-)	2	14.81	86.4	94800000	31.36	501.73	1002.58	5.52
(K)DAIPENLPPLTADFAEDK(D)	3	14.29	89.2	29300000	45.55	652.84	1955.96	3.77
(K)KQTALVELLK(H)	2	14.23	92.2	55800000	37.44	571.87	1142.71	8.59
(R)KVPQVSTPTLVEVSR(S)	3	14.13	73.5	385000000	33.66	547.42	1639.94	8.75
(K)EACFAVEGPK(L)	2	14.03	92.1	32700000	25.81	553.11	1107.51	4.53
(K)AEFVEVTK(L)	2	13.86	91.1	262000000	22.63	461.64	922.488	4.53
(K)VPQVSTPTLVEVSR(S)	2	13.85	89.3	199000000	35.43	756.35	1511.84	5.97
(R)mPCTEDYLSLILNR(L)	2	13.7	89.1	13900000	51.39	870.77	1724.84	4.37
(K)TVMENFVAFVDK(C)	2	13.56	85	1170000000	50.32	700.29	1399.69	4.37
(K)DLGEEHFK(G)	2	13.53	90.2	15900000	8.51	487.57	974.458	4.65
(K)YICDNQDTISSK(L)	2	13.45	77.6	91100000	3.41	722.26	1443.64	4.21
(K)YICDNQDTISSK(L)	2	12.91	74.3	74500000	19.75	722.64	1443.64	4.21
(K)LFTFHADICTLPDTEK(Q)	3	12.83	75	387000000	42.88	636.83	1907.92	4.54
(K)CCAADDKEACFAVEGPK(L)	3	12.76	77.8	21700000	27.86	643.28	1927.8	4.32
(K)DAFLGSFLYEYSR(R)	2	12.73	86	11500000	57.63	784.72	1567.74	4.37
(K)LKPDPNTLCDEFK(A)	3	12.5	91.1	90500000	33.94	526.55	1576.77	4.56
(R)FKDLGEEHFK(G)	3	12.44	71.6	10900000	25.62	417.4	1249.62	5.44
(K)SHCIAEVEK(D)	2	12.25	75	2020000	11.09	536.66	1072.51	5.38
(K)DLGEEHFK(G)	2	12.05	90.6	14600000	10.66	487.65	974.458	4.65
(K)GLVLIAFSQYLQQCPFDEHVK(L)	4	11.78	77.6	6800000	59.89	623.92	2492.26	5.32
(K)DAIPENLPPLTADFAEDKDVCK(N)	2	11.76	81	43400000	44.23	1230	2458.18	3.96
(R)KVPQVSTPTLVEVSR(S)	2	11.71	83.7	754000000	33.53	820.32	1639.94	8.75
(K)DLGEEHFK(G)	2	11.52	90.2	12000000	20.98	487.65	974.458	4.65
(K)GACLLPK(I)	2	11.41	78.1	14600000	22.02	379.74	758.423	8.75
(K)TVmENFVAFVDK(C)	2	11.36	82.6	41000000	42.22	708.71	1399.69	4.37
(K)DDSPDLPK(L)	2	11.21	84.4	12700000	3.44	443.7	886.415	3.93
(R)LCVLHEK(T)	2	11.07	79.2	8740000	4.43	449.75	898.481	6.75
(R)ETYGDMADCCEK(Q)	2	10.99	75.1	10600000	10.8	739.65	1478.52	3.91
(R)ETYGDMADCCEK(Q)	2	10.93	90.6	19500000	22.21	739.69	1478.52	3.91
(K)DAIPENLPPLTADFAEDK(D)	2	10.86	94.1	59900000	45.52	978.73	1955.96	3.77
(K)TVmENFVAFVDK(C)	2	10.84	71.3	42500000	42.32	708.27	1399.69	4.37
(R)MPCTEDYLSLILNR(L)	2	10.81	82.4	583000000	53.32	862.98	1724.84	4.37
(K)EACFAVEGPK(L)	2	10.78	87.9	40500000	26.7	554.87	1107.51	4.53
(K)DAFLGSFLYEYSR(R)	2	10.53	73.5	23400000	55.6	784.2	1567.74	4.37
(K)DAFLGSFLYEYSR(R)	2	10.51	73.7	11200000	57.31	784.26	1567.74	4.37
(K)DAFLGSFLYEYSR(R)	2	10.41	63.8	10800000	58.07	784.6	1567.74	4.37
(R)FKDLGEEHFK(G)	3	10.14	67	11100000	25.33	417.23	1249.62	5.44
(K)DLGEEHFK(G)	2	10.13	93.8	7630000	11.31	487.83	974.458	4.65
(K)EYEATLEECCAK(D)	2	10.13	89.9	25300000	23.9	752.25	1502.61	4.09
(K)CCTESLVNR(R)	2	9.99	72.6	12800000	3.8	569.72	1138.5	6
(K)YNGVFQECCQAEDK(G)	2	9.79	77.3	48300000	27.63	874.24	1747.7	4.14
(K)DAFLGSFLYEYSR(R)	2	9.67	91.1	304000000	54.07	784.7	1567.74	4.37
(K)GACLLPK(I)	2	9.46	77.8	13500000	24.16	379.67	758.423	8.75
(K)SLHTLFGDELCK(V)	2	9.43	77.9	164000000	39.39	710.3	1419.69	5.3
(K)DDSPDLPK(L)	2	9.35	78.7	12400000	15.78	443.71	886.415	3.93
(R)ETYGDMADCCEK(Q)	2	9.29	87.6	12200000	8.79	739.58	1478.52	3.91
(K)DAFLGSFLYEYSR(R)	2	9.24	78.1	6360000	61.59	784.29	1567.74	4.37
(R)RHPEYAVSVLLR(L)	2	9.16	97.4	97800000	36.27	720.35	1439.81	8.75
(K)YICDNQDTISSK(L)	2	8.96	82.7	84400000	19.85	722.27	1443.64	4.21
(R)LCVLHEK(T)	2	8.75	68.2	4160000	19.55	449.66	898.481	6.75
(K)YICDNQDTISSK(L)	2	8.69	85.4	126000000	21.05	722.27	1443.64	4.21
(R)NECFLSHK(D)	2	8.67	67.5	8150000	6.36	517.78	1034.47	6.75
(K)DLGEEHFK(G)	2	8.62	75.2	1980000	13.02	487.69	974.458	4.65
(K)EYEATLEECCAK(D)	2	8.51	78.6	16600000	25.3	752.18	1502.61	4.09
(K)YICDNQDTISSK(L)	2	8.49	86.9	136000000	20.46	722.26	1443.64	4.21
(K)DDSPDLPK(L)	2	8.48	70	10900000	18.06	443.62	886.415	3.93
(K)CCTESLVNR(R)	2	8.47	82	10000000	19.35	569.64	1138.5	6
(R)HPYFYAPELLYYANK(Y)	2	8.45	85	46400000	48.83	944.95	1888.93	6.75
(K)AEFVEVTK(L)	2	8.44	82.3	108000000	24.73	461.78	922.488	4.53
(R)RHPEYAVSVLLR(L)	2	8.44	79.9	98700000	36.21	720.83	1439.81	8.75
(K)CCTESLVNR(R)	2	8.41	82.3	12500000	3.89	569.6	1138.5	6
(K)CCTESLVNR(R)	2	8.37	69.4	10400000	19.25	569.71	1138.5	6
(R)ETYGDMADCCEK(Q)	2	8.35	79.2	8440000	8.07	739.63	1478.52	3.91
(R)ETYGDMADCCEK(Q)	2	8.26	81	7480000	7.97	739.68	1478.52	3.91
(R)ETYGDMADCCEK(Q)	2	8.24	71.1	10900000	8.58	739.66	1478.52	3.91
(K)YLYEIAR(R)	2	8.21	97.4	267000000	30.6	464.23	927.493	6
(K)LFTFHADICTLPDTEK(Q)	2	8.16	81.2	113000000	43	954.4	1907.92	4.54
(R)MPCTEDYLSLILNR(L)	2	7.88	61.8	584000000	53.41	863.15	1724.84	4.37
(K)LVTDLTK(V)	2	7.71	97.5	56700000	19.78	395.21	789.472	5.84
(K)QEPERNECFLSHKDDSPDLPK(L)	4	7.7	67.1	35800000	28.81	636.18	2541.17	4.58
(R)RPCFSALTPDETYVPK(A)	2	7.7	80.3	216000000	36.75	941.26	1880.92	6.07
(K)YICDNQDTISSK(L)	2	7.64	68	27800000	19.04	722.28	1443.64	4.21
(K)YICDNQDTISSK(L)	2	7.56	60.5	90900000	4.09	722.16	1443.64	4.21
(K)DLGEEHFK(G)	2	7.38	82.5	13200000	10.11	487.73	974.458	4.65
(K)DAFLGSFLYEYSR(R)	2	7.35	65.3	6490000	61.48	784.96	1567.74	4.37
(R)FKDLGEEHFK(G)	2	7.29	72.6	12600000	26.17	625.25	1249.62	5.44
(K)CCAADDKEACFAVEGPK(L)	3	7.21	77.1	21100000	28.05	643.56	1927.8	4.32
(K)QTALVELLK(H)	2	7.2	91.1	276000000	41.41	507.75	1014.62	6
(K)EYEATLEECCAK(D)	2	7.1	69	17700000	25.21	752.57	1502.61	4.09
(K)DAFLGSFLYEYSR(R)	2	7.08	74.2	22700000	55.7	784.23	1567.74	4.37
(R)ETYGDMADCCEK(Q)	2	6.97	62.4	6400000	11.46	739.67	1478.52	3.91
(R)ETYGDMADCCEK(Q)	2	6.96	65.7	13100000	10.45	739.68	1478.52	3.91
(K)LVTDLTK(V)	2	6.87	94.5	25400000	17.43	395.3	789.472	5.84
(K)DDPHACYSTVFDK(L)	2	6.8	64.9	72800000	29.83	777.69	1554.65	4.41
(R)ETYGDMADCCEK(Q)	2	6.66	89.6	3670000	7.21	740.09	1478.52	3.91
(R)LCVLHEK(T)	2	6.62	72.4	4280000	19.38	449.72	898.481	6.75
(K)LVTDLTK(V)	2	6.62	91.4	55900000	20.66	395.17	789.472	5.84
(K)SHCIAEVEK(D)	2	6.43	64.6	3090000	10.23	536.74	1072.51	5.38
(K)DAFLGSFLYEYSR(R)	2	6.4	74.3	20300000	55.9	784.26	1567.74	4.37
(K)YICDNQDTISSK(L)	2	6.36	83.7	95800000	19.98	722.28	1443.64	4.21
(R)ETYGDMADCCEK(Q)	2	6.3	84.5	15200000	9.71	739.69	1478.52	3.91
(R)NECFLSHK(D)	2	6.28	61.9	9580000	6.25	517.69	1034.47	6.75
(K)DAFLGSFLYEYSR(R)	2	6.2	70.6	11200000	58.14	784.26	1567.74	4.37
(K)LVTDLTK(V)	2	6.19	95.9	74200000	14.86	395.22	789.472	5.84
(K)LVTDLTK(V)	2	6.16	94.1	48400000	15.47	395.27	789.472	5.84

## Sheet: 0 site-TAMSP ATRP before-02
Accession	Protein name	Species	Protein MW(Da)	Coverage (%)	Spectra	Unique peptides	MS/MS Search (score)	Mean peptide Spectral Intensity
P02769	serum albumin	BOVIN	71289	64.5	97	34	425.24	167000000
Sequence	z	Score	SPI	Spectrum	RT	m/z	MH+	Peptide pI
			(%)	Intensity	(min)	Measured	Matched
						(Da)	(Da)
(K)DAFLGSFLYEYSR(R)	3	20.38	97.6	26600000	52.64	523.46	1567.74	4.37
(K)LGEYGFQNALIVR(Y)	2	18.03	91.8	1760000000	42.25	740.37	1479.8	6
(R)MPCTEDYLSLILNR(L)	3	16.5	100	73900000	53.4	575.71	1724.84	4.37
(K)HLVDEPQNLIK(Q)	3	16.45	91.6	44600000	30.83	436.01	1305.72	5.32
(K)DAFLGSFLYEYSR(R)	2	16.21	94.1	1670000000	52.51	784.32	1567.74	4.37
(K)LVNELTEFAK(T)	2	16.11	92.6	839000000	37.44	582.28	1163.63	4.53
(R)RPCFSALTPDETYVPK(A)	3	15.9	97.5	339000000	36.5	627.63	1880.92	6.07
(K)TVMENFVAFVDK(C)	2	15.59	87.2	1250000000	50.29	700.35	1399.69	4.37
(K)SLHTLFGDELCK(V)	3	15.27	85.3	103000000	39.23	474	1419.69	5.3
(K)LFTFHADICTLPDTEK(Q)	2	15.19	88.7	164000000	42.81	954.38	1907.92	4.54
(R)HPYFYAPELLYYANK(Y)	3	14.98	90.2	158000000	48.59	630.47	1888.93	6.75
(K)GLVLIAFSQYLQQCPFDEHVK(L)	4	14.9	81	38700000	59.47	623.97	2492.26	5.32
(K)LFTFHADICTLPDTEK(Q)	3	14.89	81.4	532000000	42.62	636.63	1907.92	4.54
(K)LGEYGFQNALIVR(Y)	3	14.87	83	34100000	43.09	494.17	1479.8	6
(R)ETYGDMADCCEK(Q)	2	14.86	89.6	9500000	6.84	739.55	1478.52	3.91
(R)MPCTEDYLSLILNR(L)	2	14.84	84.6	439000000	53.3	862.8	1724.84	4.37
(K)GLVLIAFSQYLQQCPFDEHVK(L)	3	14.67	79.3	185000000	59.33	831.59	2492.26	5.32
(K)HLVDEPQNLIK(Q)	2	14.08	86.1	578000000	30.67	653.3	1305.72	5.32
(K)TVMENFVAFVDK(C)	3	14.02	80.9	11400000	50.51	467.43	1399.69	4.37
(K)SLHTLFGDELCK(V)	2	13.83	86.4	202000000	39.26	710.26	1419.69	5.3
(K)YICDNQDTISSK(L)	2	13.82	75.1	28600000	17.29	722.29	1443.64	4.21
(K)YICDNQDTISSK(L)	2	13.42	91.4	121000000	3.43	722.32	1443.64	4.21
(K)LKPDPNTLCDEFK(A)	3	13.4	88.5	94500000	33.56	526.27	1576.77	4.56
(K)YICDNQDTISSK(L)	2	13.23	87.5	115000000	20.23	722.25	1443.64	4.21
(K)ECCDKPLLEK(S)	3	13.06	85.8	3390000	4.23	431.37	1291.6	4.68
(K)DAIPENLPPLTADFAEDK(D)	2	12.82	92.6	76000000	45.44	978.38	1955.96	3.77
(K)LVVSTQTALA(-)	2	12.67	81.5	94800000	31.2	501.82	1002.58	5.52
(K)YICDNQDTISSK(L)	2	12.63	93.2	106000000	20.93	722.27	1443.64	4.21
(K)GACLLPK(I)	2	12.53	80.3	5120000	24.3	379.81	758.423	8.75
(R)NECFLSHK(D)	2	12.31	80.3	9660000	5.49	517.71	1034.47	6.75
(R)mPCTEDYLSLILNR(L)	2	12.16	72.4	14400000	51.37	870.9	1724.84	4.37
(K)GLVLIAFSQYLQQCPFDEHVK(L)	3	12.01	80.2	173000000	60.35	831.35	2492.26	5.32
(K)SHCIAEVEK(D)	2	11.91	64.6	27300000	2.41	536.32	1072.51	5.38
(K)GACLLPK(I)	2	11.84	87.5	11800000	22.03	379.72	758.423	8.75
(K)GLVLIAFSQYLQQCPFDEHVK(L)	3	11.81	95.3	181000000	59.91	831.65	2492.26	5.32
(K)DLGEEHFK(G)	2	11.54	89.9	16800000	8.06	487.69	974.458	4.65
(K)AEFVEVTK(L)	2	11.32	88.7	214000000	23.92	461.67	922.488	4.53
(K)GLVLIAFSQYLQQCPFDEHVK(L)	2	11.11	76.9	9850000	59.72	1247.41	2492.26	5.32
(K)AEFVEVTK(L)	2	11.05	87.8	241000000	22.6	461.69	922.488	4.53
(K)DAFLGSFLYEYSR(R)	2	11.01	77.4	31000000	54.81	784.35	1567.74	4.37
(K)CCTESLVNR(R)	2	10.95	81.9	12600000	3.75	569.69	1138.5	6
(K)DLGEEHFK(G)	2	10.93	85.1	11200000	10.1	487.66	974.458	4.65
(K)YICDNQDTISSK(L)	2	10.88	77.9	7240000	16.92	722.95	1443.64	4.21
(K)DLGEEHFK(G)	2	10.84	83.6	6740000	20.13	487.65	974.458	4.65
(K)DAFLGSFLYEYSR(R)	2	10.65	73	18900000	56.57	784.85	1567.74	4.37
(K)DAFLGSFLYEYSR(R)	2	10.42	82.4	40100000	54.69	784.72	1567.74	4.37
(K)LKPDPNTLCDEFK(A)	2	10.41	96.3	176000000	33.75	788.76	1576.77	4.56
(K)CCTESLVNR(R)	2	10.14	87.9	8300000	19.25	569.71	1138.5	6
(R)LCVLHEK(T)	2	10.06	82.3	3030000	19.46	449.8	898.481	6.75
(K)DLGEEHFK(G)	2	10.02	89.3	10700000	21.22	487.74	974.458	4.65
(K)VPQVSTPTLVEVSR(S)	2	9.93	84.9	195000000	35.27	756.32	1511.84	5.97
(K)LGEYGFQNALIVR(Y)	2	9.83	87.1	1640000000	43.56	740.44	1479.8	6
(R)ETYGDMADCCEK(Q)	2	9.65	92.9	15500000	22.22	739.98	1478.52	3.91
(R)RPCFSALTPDETYVPK(A)	2	9.64	66.2	219000000	36.62	940.94	1880.92	6.07
(K)DDSPDLPK(L)	2	9.53	82.4	4670000	17.53	443.65	886.415	3.93
(K)DAFLGSFLYEYSR(R)	2	9.5	81.8	41000000	54.52	784.22	1567.74	4.37
(K)DDSPDLPK(L)	2	9.44	75.2	8410000	3.56	443.68	886.415	3.93
(R)NECFLSHK(D)	2	9.38	67.1	6070000	20.07	517.72	1034.47	6.75
(K)QTALVELLK(H)	2	9.21	91.6	287000000	41.49	507.83	1014.62	6
(K)TCVADESHAGCEK(S)	3	9.2	62.4	2530000	4.85	488.76	1463.59	4.65
(R)HPYFYAPELLYYANK(Y)	2	9.19	79.3	107000000	48.62	945.26	1888.93	6.75
(K)GLVLIAFSQYLQQCPFDEHVK(L)	2	9.11	68.5	9720000	59.82	1247	2492.26	5.32
(K)DLGEEHFK(G)	2	8.92	84.4	5860000	11.05	487.62	974.458	4.65
(R)NECFLSHK(D)	2	8.92	61	6130000	19.56	517.93	1034.47	6.75
(K)SHCIAEVEK(D)	2	8.91	63.2	2860000	9.89	536.69	1072.51	5.38
(K)YICDNQDTISSK(L)	2	8.9	73.8	46100000	19.63	722.24	1443.64	4.21
(K)DAFLGSFLYEYSR(R)	2	8.82	82.3	265000000	53.96	784.43	1567.74	4.37
(R)ETYGDMADCCEK(Q)	2	8.73	76	6670000	9.47	739.58	1478.52	3.91
(K)EYEATLEECCAK(D)	2	8.67	76.8	17500000	24.01	751.74	1502.61	4.09
(K)SHCIAEVEK(D)	2	8.59	67.1	3210000	9.23	536.81	1072.51	5.38
(K)YLYEIAR(R)	2	8.2	96.6	238000000	30.64	464.35	927.493	6
(R)LCVLHEK(T)	2	8.18	61.4	13000000	4.1	449.76	898.481	6.75
(K)YNGVFQECCQAEDK(G)	2	8.12	77.2	46900000	28.3	874.69	1747.7	4.14
(K)DLGEEHFK(G)	2	8.04	62.3	7190000	7.99	487.73	974.458	4.65
(R)ETYGDMADCCEK(Q)	2	7.9	72.7	5750000	6.95	739.55	1478.52	3.91
(K)DDPHACYSTVFDK(L)	3	7.89	60.6	22500000	30	518.97	1554.65	4.41
(K)TVMENFVAFVDK(C)	2	7.87	83.2	1250000000	50.95	700.37	1399.69	4.37
(R)ETYGDMADCCEK(Q)	2	7.81	95.3	9960000	8.69	740.14	1478.52	3.91
(K)HLVDEPQNLIK(Q)	2	7.79	92.4	580000000	31.39	653.34	1305.72	5.32
(K)LVTDLTK(V)	2	7.76	89.1	22500000	17.8	395.24	789.472	5.84
(K)DDPHACYSTVFDK(L)	2	7.72	68.4	54500000	29.88	777.73	1554.65	4.41
(K)TVmENFVAFVDK(C)	2	7.67	65.4	44500000	42.28	708.21	1399.69	4.37
(R)ETYGDMADCCEK(Q)	2	7.43	79.6	6260000	9.54	739.69	1478.52	3.91
(R)RPCFSALTPDETYVPK(A)	2	7.39	75.5	224000000	36.69	940.96	1880.92	6.07
(K)SHCIAEVEK(D)	2	7.18	73.3	1850000	11.61	536.7	1072.51	5.38
(K)LVTDLTK(V)	2	7.17	94.9	49600000	13.14	395.16	789.472	5.84
(K)CCTESLVNR(R)	2	7.16	74.2	8210000	19.35	569.68	1138.5	6
(K)SHCIAEVEK(D)	2	6.84	73.3	2180000	11.38	536.69	1072.51	5.38
(K)LVTDLTK(V)	2	6.6	90.6	48200000	20.96	395.24	789.472	5.84
(R)ETYGDMADCCEK(Q)	2	6.56	73.8	14400000	22.28	739.7	1478.52	3.91
(K)LVTDLTK(V)	2	6.55	87.7	51900000	15.75	395.22	789.472	5.84
(K)DAFLGSFLYEYSR(R)	2	6.21	69.9	11500000	57.35	784.21	1567.74	4.37
(K)YICDNQDTISSK(L)	2	6.19	89.1	123000000	3.53	722.42	1443.64	4.21
(R)HPEYAVSVLLR(L)	2	6.18	71.2	78600000	38.95	641.58	1283.71	6.75
(K)CCTESLVNR(R)	2	6.14	77	6740000	20.17	570.22	1138.5	6
(K)YNGVFQECCQAEDK(G)	2	6.04	86.5	44900000	27.81	874.14	1747.7	4.14
(K)LVTDLTK(V)	2	6.01	85.8	32500000	14.43	395.24	789.472	5.84

## Sheet: 1 site-TAMSP ATRP before-02
Accession	Protein name	Species	Protein MW(Da)	Coverage (%)	Spectra	Unique peptides	MS/MS Search (score)	Mean peptide Spectral Intensity
P02769	serum albumin	BOVIN	71289	67.3	120	43	544.53	167000000
Sequence	z	Score	SPI	Spectrum	RT	m/z	MH+	Peptide pI
			(%)	Intensity	(min)	Measured	Matched
						(Da)	(Da)
(K)DAFLGSFLYEYSR(R)	3	20.38	97.6	26600000	52.64	523.46	1567.74	4.37
(R)RHPEYAVSVLLR(L)	3	18.66	94.1	146000000	35.78	480.59	1439.81	8.75
(K)LGEYGFQNALIVR(Y)	2	18.03	91.8	1760000000	42.25	740.37	1479.8	6
(K)KQTALVELLK(H)	3	17.04	91.1	5410000	37.28	381.6	1142.71	8.59
(R)MPCTEDYLSLILNR(L)	3	16.5	100	73900000	53.4	575.71	1724.84	4.37
(K)HLVDEPQNLIK(Q)	3	16.45	91.6	44600000	30.83	436.01	1305.72	5.32
(K)DAFLGSFLYEYSR(R)	2	16.21	94.1	1670000000	52.51	784.32	1567.74	4.37
(K)LVNELTEFAK(T)	2	16.11	92.6	839000000	37.44	582.28	1163.63	4.53
(R)RPCFSALTPDETYVPK(A)	3	15.9	97.5	339000000	36.5	627.63	1880.92	6.07
(R)KVPQVSTPTLVEVSR(S)	3	15.76	85.7	412000000	33.4	547.41	1639.94	8.75
(K)TVMENFVAFVDK(C)	2	15.59	87.2	1250000000	50.29	700.35	1399.69	4.37
(K)SLHTLFGDELCK(V)	3	15.27	85.3	103000000	39.23	474	1419.69	5.3
(R)RHPYFYAPELLYYANK(Y)	3	15.27	89.4	75800000	45.94	682.26	2045.03	8.39
(K)LFTFHADICTLPDTEK(Q)	2	15.19	88.7	164000000	42.81	954.38	1907.92	4.54
(R)HPYFYAPELLYYANK(Y)	3	14.98	90.2	158000000	48.59	630.47	1888.93	6.75
(K)GLVLIAFSQYLQQCPFDEHVK(L)	4	14.9	81	38700000	59.47	623.97	2492.26	5.32
(K)LFTFHADICTLPDTEK(Q)	3	14.89	81.4	532000000	42.62	636.63	1907.92	4.54
(K)LGEYGFQNALIVR(Y)	3	14.87	83	34100000	43.09	494.17	1479.8	6
(R)ETYGDMADCCEK(Q)	2	14.86	89.6	9500000	6.84	739.55	1478.52	3.91
(R)MPCTEDYLSLILNR(L)	2	14.84	84.6	439000000	53.3	862.8	1724.84	4.37
(K)GLVLIAFSQYLQQCPFDEHVK(L)	3	14.67	79.3	185000000	59.33	831.59	2492.26	5.32
(K)HLVDEPQNLIK(Q)	2	14.08	86.1	578000000	30.67	653.3	1305.72	5.32
(K)TVMENFVAFVDK(C)	3	14.02	80.9	11400000	50.51	467.43	1399.69	4.37
(K)SLHTLFGDELCK(V)	2	13.83	86.4	202000000	39.26	710.26	1419.69	5.3
(K)YICDNQDTISSK(L)	2	13.82	75.1	28600000	17.29	722.29	1443.64	4.21
(R)RHPYFYAPELLYYANK(Y)	4	13.67	90.7	16200000	46.13	512.33	2045.03	8.39
(R)FKDLGEEHFK(G)	3	13.64	77.4	21900000	25.2	417.43	1249.62	5.44
(K)YICDNQDTISSK(L)	2	13.42	91.4	121000000	3.43	722.32	1443.64	4.21
(K)LKPDPNTLCDEFK(A)	3	13.4	88.5	94500000	33.56	526.27	1576.77	4.56
(K)YICDNQDTISSK(L)	2	13.23	87.5	115000000	20.23	722.25	1443.64	4.21
(R)KVPQVSTPTLVEVSR(S)	3	13.07	74.6	406000000	34.16	547.54	1639.94	8.75
(K)ECCDKPLLEK(S)	3	13.06	85.8	3390000	4.23	431.37	1291.6	4.68
(R)KVPQVSTPTLVEVSR(S)	2	13.03	89.4	796000000	33.37	820.4	1639.94	8.75
(K)DAIPENLPPLTADFAEDK(D)	2	12.82	92.6	76000000	45.44	978.38	1955.96	3.77
(K)KQTALVELLK(H)	2	12.77	93.8	94800000	37.26	571.88	1142.71	8.59
(K)DAIPENLPPLTADFAEDKDVCK(N)	2	12.69	80	40900000	44.25	1230.05	2458.18	3.96
(K)LVVSTQTALA(-)	2	12.67	81.5	94800000	31.2	501.82	1002.58	5.52
(K)YICDNQDTISSK(L)	2	12.63	93.2	106000000	20.93	722.27	1443.64	4.21
(K)GACLLPK(I)	2	12.53	80.3	5120000	24.3	379.81	758.423	8.75
(R)FKDLGEEHFK(G)	2	12.5	67.6	20400000	26.26	625.16	1249.62	5.44
(R)NECFLSHK(D)	2	12.31	80.3	9660000	5.49	517.71	1034.47	6.75
(R)mPCTEDYLSLILNR(L)	2	12.16	72.4	14400000	51.37	870.9	1724.84	4.37
(R)RHPYFYAPELLYYANK(Y)	2	12.08	83.5	37300000	46.1	1023.34	2045.03	8.39
(K)GLVLIAFSQYLQQCPFDEHVK(L)	3	12.01	80.2	173000000	60.35	831.35	2492.26	5.32
(K)SHCIAEVEK(D)	2	11.91	64.6	27300000	2.41	536.32	1072.51	5.38
(K)GACLLPK(I)	2	11.84	87.5	11800000	22.03	379.72	758.423	8.75
(R)FKDLGEEHFK(G)	3	11.84	85.4	18500000	26.36	417.37	1249.62	5.44
(K)GLVLIAFSQYLQQCPFDEHVK(L)	3	11.81	95.3	181000000	59.91	831.65	2492.26	5.32
(R)FKDLGEEHFK(G)	3	11.64	86.9	25300000	25.48	417.29	1249.62	5.44
(K)DLGEEHFK(G)	2	11.54	89.9	16800000	8.06	487.69	974.458	4.65
(K)LKECCDKPLLEK(S)	4	11.38	72.6	1910000	7.07	384.03	1532.78	6.18
(K)AEFVEVTK(L)	2	11.32	88.7	214000000	23.92	461.67	922.488	4.53
(K)GLVLIAFSQYLQQCPFDEHVK(L)	2	11.11	76.9	9850000	59.72	1247.41	2492.26	5.32
(K)AEFVEVTK(L)	2	11.05	87.8	241000000	22.6	461.69	922.488	4.53
(K)DAFLGSFLYEYSR(R)	2	11.01	77.4	31000000	54.81	784.35	1567.74	4.37
(K)CCTESLVNR(R)	2	10.95	81.9	12600000	3.75	569.69	1138.5	6
(K)DLGEEHFK(G)	2	10.93	85.1	11200000	10.1	487.66	974.458	4.65
(K)YICDNQDTISSK(L)	2	10.88	77.9	7240000	16.92	722.95	1443.64	4.21
(K)DLGEEHFK(G)	2	10.84	83.6	6740000	20.13	487.65	974.458	4.65
(K)DAFLGSFLYEYSR(R)	2	10.65	73	18900000	56.57	784.85	1567.74	4.37
(K)DAFLGSFLYEYSR(R)	2	10.42	82.4	40100000	54.69	784.72	1567.74	4.37
(K)LKPDPNTLCDEFK(A)	2	10.41	96.3	176000000	33.75	788.76	1576.77	4.56
(K)CCTESLVNR(R)	2	10.14	87.9	8300000	19.25	569.71	1138.5	6
(R)LCVLHEK(T)	2	10.06	82.3	3030000	19.46	449.8	898.481	6.75
(R)RHPEYAVSVLLR(L)	2	10.05	98.6	278000000	35.84	720.28	1439.81	8.75
(K)DLGEEHFK(G)	2	10.02	89.3	10700000	21.22	487.74	974.458	4.65
(K)VPQVSTPTLVEVSR(S)	2	9.93	84.9	195000000	35.27	756.32	1511.84	5.97
(K)LGEYGFQNALIVR(Y)	2	9.83	87.1	1640000000	43.56	740.44	1479.8	6
(R)ETYGDMADCCEK(Q)	2	9.65	92.9	15500000	22.22	739.98	1478.52	3.91
(R)RHPYFYAPELLYYANK(Y)	2	9.65	73.5	34700000	46.04	1022.85	2045.03	8.39
(R)RPCFSALTPDETYVPK(A)	2	9.64	66.2	219000000	36.62	940.94	1880.92	6.07
(K)DDSPDLPK(L)	2	9.53	82.4	4670000	17.53	443.65	886.415	3.93
(K)DAFLGSFLYEYSR(R)	2	9.5	81.8	41000000	54.52	784.22	1567.74	4.37
(K)DDSPDLPK(L)	2	9.44	75.2	8410000	3.56	443.68	886.415	3.93
(R)NECFLSHK(D)	2	9.38	67.1	6070000	20.07	517.72	1034.47	6.75
(K)QTALVELLK(H)	2	9.21	91.6	287000000	41.49	507.83	1014.62	6
(K)TCVADESHAGCEK(S)	3	9.2	62.4	2530000	4.85	488.76	1463.59	4.65
(R)HPYFYAPELLYYANK(Y)	2	9.19	79.3	107000000	48.62	945.26	1888.93	6.75
(K)GLVLIAFSQYLQQCPFDEHVK(L)	2	9.11	68.5	9720000	59.82	1247	2492.26	5.32
(R)RHPEYAVSVLLR(L)	2	8.96	65.4	276000000	35.75	720.49	1439.81	8.75
(K)DLGEEHFK(G)	2	8.92	84.4	5860000	11.05	487.62	974.458	4.65
(R)NECFLSHK(D)	2	8.92	61	6130000	19.56	517.93	1034.47	6.75
(K)SHCIAEVEK(D)	2	8.91	63.2	2860000	9.89	536.69	1072.51	5.38
(K)YICDNQDTISSK(L)	2	8.9	73.8	46100000	19.63	722.24	1443.64	4.21
(K)DAFLGSFLYEYSR(R)	2	8.82	82.3	265000000	53.96	784.43	1567.74	4.37
(R)ETYGDMADCCEK(Q)	2	8.73	76	6670000	9.47	739.58	1478.52	3.91
(K)EYEATLEECCAK(D)	2	8.67	76.8	17500000	24.01	751.74	1502.61	4.09
(K)SHCIAEVEK(D)	2	8.59	67.1	3210000	9.23	536.81	1072.51	5.38
(K)YLYEIAR(R)	2	8.2	96.6	238000000	30.64	464.35	927.493	6
(R)LCVLHEK(T)	2	8.18	61.4	13000000	4.1	449.76	898.481	6.75
(K)YNGVFQECCQAEDK(G)	2	8.12	77.2	46900000	28.3	874.69	1747.7	4.14
(K)DLGEEHFK(G)	2	8.04	62.3	7190000	7.99	487.73	974.458	4.65
(R)KVPQVSTPTLVEVSR(S)	2	7.98	87.9	789000000	34.04	820.4	1639.94	8.75
(R)ETYGDMADCCEK(Q)	2	7.9	72.7	5750000	6.95	739.55	1478.52	3.91
(K)LVTDLTK(V)	2	7.87	94.8	26700000	18.45	395.11	789.472	5.84
(K)TVMENFVAFVDK(C)	2	7.87	83.2	1250000000	50.95	700.37	1399.69	4.37
(R)ETYGDMADCCEK(Q)	2	7.81	95.3	9960000	8.69	740.14	1478.52	3.91
(K)HLVDEPQNLIK(Q)	2	7.79	92.4	580000000	31.39	653.34	1305.72	5.32
(K)LVTDLTK(V)	2	7.76	89.1	22500000	17.8	395.24	789.472	5.84
(K)DDPHACYSTVFDK(L)	2	7.72	68.4	54500000	29.88	777.73	1554.65	4.41
(K)GLVLIAFSQYLQQCPFDEHVK(L)	3	7.68	89.2	181000000	60.01	831.68	2492.26	5.32
(K)TVmENFVAFVDK(C)	2	7.67	65.4	44500000	42.28	708.21	1399.69	4.37
(K)SHCIAEVEKDAIPENLPPLTADFAEDK(D)	4	7.58	69.6	91600000	45.72	753.25	3009.45	4.19
(R)ETYGDMADCCEK(Q)	2	7.43	79.6	6260000	9.54	739.69	1478.52	3.91
(R)RPCFSALTPDETYVPK(A)	2	7.39	75.5	224000000	36.69	940.96	1880.92	6.07
(K)KFWGK(Y)	2	7.33	71.6	3300000	8.47	333.19	665.377	10
(K)SHCIAEVEK(D)	2	7.18	73.3	1850000	11.61	536.7	1072.51	5.38
(K)LVTDLTK(V)	2	7.17	94.9	49600000	13.14	395.16	789.472	5.84
(K)CCTESLVNR(R)	2	7.16	74.2	8210000	19.35	569.68	1138.5	6
(K)SHCIAEVEK(D)	2	6.84	73.3	2180000	11.38	536.69	1072.51	5.38
(K)LVTDLTK(V)	2	6.6	90.6	48200000	20.96	395.24	789.472	5.84
(R)ETYGDMADCCEK(Q)	2	6.56	73.8	14400000	22.28	739.7	1478.52	3.91
(K)LVTDLTK(V)	2	6.55	87.7	51900000	15.75	395.22	789.472	5.84
(K)DAFLGSFLYEYSR(R)	2	6.21	69.9	11500000	57.35	784.21	1567.74	4.37
(K)YICDNQDTISSK(L)	2	6.19	89.1	123000000	3.53	722.42	1443.64	4.21
(R)HPEYAVSVLLR(L)	2	6.18	71.2	78600000	38.95	641.58	1283.71	6.75
(K)LVTDLTK(V)	2	6.15	93.7	23800000	16.88	395.23	789.472	5.84
(K)CCTESLVNR(R)	2	6.14	77	6740000	20.17	570.22	1138.5	6
(K)YNGVFQECCQAEDK(G)	2	6.04	86.5	44900000	27.81	874.14	1747.7	4.14
(K)LVTDLTK(V)	2	6.01	85.8	32500000	14.43	395.24	789.472	5.84

## Sheet: 2 site-TAMSP ATRP before-02
Accession	Protein name	Species	Protein MW(Da)	Coverage (%)	Spectra	Unique peptides	MS/MS Search (score)	Mean peptide Spectral Intensity
P02769	serum albumin	BOVIN	71289	66.5	114	43	548.55	175000000
Sequence	z	Score	SPI	Spectrum	RT	m/z	MH+	Peptide pI
			(%)	Intensity	(min)	Measured	Matched
						(Da)	(Da)
(K)DAFLGSFLYEYSR(R)	3	20.38	97.6	26600000	52.64	523.46	1567.74	4.37
(R)RHPEYAVSVLLR(L)	3	18.66	94.1	146000000	35.78	480.59	1439.81	8.75
(K)LGEYGFQNALIVR(Y)	2	18.03	91.8	1760000000	42.25	740.37	1479.8	6
(K)KQTALVELLK(H)	3	17.04	91.1	5410000	37.28	381.6	1142.71	8.59
(R)MPCTEDYLSLILNR(L)	3	16.5	100	73900000	53.4	575.71	1724.84	4.37
(K)HLVDEPQNLIK(Q)	3	16.45	91.6	44600000	30.83	436.01	1305.72	5.32
(K)DAFLGSFLYEYSR(R)	2	16.21	94.1	1670000000	52.51	784.32	1567.74	4.37
(K)LVNELTEFAK(T)	2	16.11	92.6	839000000	37.44	582.28	1163.63	4.53
(R)RPCFSALTPDETYVPK(A)	3	15.9	97.5	339000000	36.5	627.63	1880.92	6.07
(R)KVPQVSTPTLVEVSR(S)	3	15.76	85.7	412000000	33.4	547.41	1639.94	8.75
(K)TVMENFVAFVDK(C)	2	15.59	87.2	1250000000	50.29	700.35	1399.69	4.37
(K)SLHTLFGDELCK(V)	3	15.27	85.3	103000000	39.23	474	1419.69	5.3
(R)RHPYFYAPELLYYANK(Y)	3	15.27	89.4	75800000	45.94	682.26	2045.03	8.39
(K)LFTFHADICTLPDTEK(Q)	2	15.19	88.7	164000000	42.81	954.38	1907.92	4.54
(R)HPYFYAPELLYYANK(Y)	3	14.98	90.2	158000000	48.59	630.47	1888.93	6.75
(K)GLVLIAFSQYLQQCPFDEHVK(L)	4	14.9	81	38700000	59.47	623.97	2492.26	5.32
(K)LFTFHADICTLPDTEK(Q)	3	14.89	81.4	532000000	42.62	636.63	1907.92	4.54
(K)LGEYGFQNALIVR(Y)	3	14.87	83	34100000	43.09	494.17	1479.8	6
(R)ETYGDMADCCEK(Q)	2	14.86	89.6	9500000	6.84	739.55	1478.52	3.91
(R)MPCTEDYLSLILNR(L)	2	14.84	84.6	439000000	53.3	862.8	1724.84	4.37
(K)GLVLIAFSQYLQQCPFDEHVK(L)	3	14.67	79.3	185000000	59.33	831.59	2492.26	5.32
(K)HLVDEPQNLIK(Q)	2	14.08	86.1	578000000	30.67	653.3	1305.72	5.32
(K)TVMENFVAFVDK(C)	3	14.02	80.9	11400000	50.51	467.43	1399.69	4.37
(K)SLHTLFGDELCK(V)	2	13.83	86.4	202000000	39.26	710.26	1419.69	5.3
(K)YICDNQDTISSK(L)	2	13.82	75.1	28600000	17.29	722.29	1443.64	4.21
(R)RHPYFYAPELLYYANK(Y)	4	13.67	90.7	16200000	46.13	512.33	2045.03	8.39
(R)FKDLGEEHFK(G)	3	13.64	77.4	21900000	25.2	417.43	1249.62	5.44
(K)YICDNQDTISSK(L)	2	13.42	91.4	121000000	3.43	722.32	1443.64	4.21
(K)LKPDPNTLCDEFK(A)	3	13.4	88.5	94500000	33.56	526.27	1576.77	4.56
(K)YICDNQDTISSK(L)	2	13.23	87.5	115000000	20.23	722.25	1443.64	4.21
(R)KVPQVSTPTLVEVSR(S)	3	13.07	74.6	406000000	34.16	547.54	1639.94	8.75
(K)ECCDKPLLEK(S)	3	13.06	85.8	3390000	4.23	431.37	1291.6	4.68
(R)KVPQVSTPTLVEVSR(S)	2	13.03	89.4	796000000	33.37	820.4	1639.94	8.75
(K)DAIPENLPPLTADFAEDK(D)	2	12.82	92.6	76000000	45.44	978.38	1955.96	3.77
(K)KQTALVELLK(H)	2	12.77	93.8	94800000	37.26	571.88	1142.71	8.59
(K)DAIPENLPPLTADFAEDKDVCK(N)	2	12.69	80	40900000	44.25	1230.05	2458.18	3.96
(K)LVVSTQTALA(-)	2	12.67	81.5	94800000	31.2	501.82	1002.58	5.52
(K)YICDNQDTISSK(L)	2	12.63	93.2	106000000	20.93	722.27	1443.64	4.21
(K)GACLLPK(I)	2	12.53	80.3	5120000	24.3	379.81	758.423	8.75
(R)FKDLGEEHFK(G)	2	12.5	67.6	20400000	26.26	625.16	1249.62	5.44
(R)NECFLSHK(D)	2	12.31	80.3	9660000	5.49	517.71	1034.47	6.75
(R)mPCTEDYLSLILNR(L)	2	12.16	72.4	14400000	51.37	870.9	1724.84	4.37
(R)RHPYFYAPELLYYANK(Y)	2	12.08	83.5	37300000	46.1	1023.34	2045.03	8.39
(K)GLVLIAFSQYLQQCPFDEHVK(L)	3	12.01	80.2	173000000	60.35	831.35	2492.26	5.32
(K)SHCIAEVEK(D)	2	11.91	64.6	27300000	2.41	536.32	1072.51	5.38
(K)GACLLPK(I)	2	11.84	87.5	11800000	22.03	379.72	758.423	8.75
(R)FKDLGEEHFK(G)	3	11.84	85.4	18500000	26.36	417.37	1249.62	5.44
(K)GLVLIAFSQYLQQCPFDEHVK(L)	3	11.81	95.3	181000000	59.91	831.65	2492.26	5.32
(R)FKDLGEEHFK(G)	3	11.64	86.9	25300000	25.48	417.29	1249.62	5.44
(K)DLGEEHFK(G)	2	11.54	89.9	16800000	8.06	487.69	974.458	4.65
(K)LKECCDKPLLEK(S)	4	11.38	72.6	1910000	7.07	384.03	1532.78	6.18
(K)AEFVEVTK(L)	2	11.32	88.7	214000000	23.92	461.67	922.488	4.53
(K)GLVLIAFSQYLQQCPFDEHVK(L)	2	11.11	76.9	9850000	59.72	1247.41	2492.26	5.32
(K)AEFVEVTK(L)	2	11.05	87.8	241000000	22.6	461.69	922.488	4.53
(K)DAFLGSFLYEYSR(R)	2	11.01	77.4	31000000	54.81	784.35	1567.74	4.37
(K)CCTESLVNR(R)	2	10.95	81.9	12600000	3.75	569.69	1138.5	6
(K)DLGEEHFK(G)	2	10.93	85.1	11200000	10.1	487.66	974.458	4.65
(K)YICDNQDTISSK(L)	2	10.88	77.9	7240000	16.92	722.95	1443.64	4.21
(K)DLGEEHFK(G)	2	10.84	83.6	6740000	20.13	487.65	974.458	4.65
(K)SHCIAEVEKDAIPENLPPLTADFAEDKDVCK(N)	4	10.78	78.7	128000000	44.43	879.11	3511.67	4.28
(K)DAFLGSFLYEYSR(R)	2	10.65	73	18900000	56.57	784.85	1567.74	4.37
(K)DAFLGSFLYEYSR(R)	2	10.42	82.4	40100000	54.69	784.72	1567.74	4.37
(K)LKPDPNTLCDEFK(A)	2	10.41	96.3	176000000	33.75	788.76	1576.77	4.56
(K)CCTESLVNR(R)	2	10.14	87.9	8300000	19.25	569.71	1138.5	6
(R)LCVLHEK(T)	2	10.06	82.3	3030000	19.46	449.8	898.481	6.75
(R)RHPEYAVSVLLR(L)	2	10.05	98.6	278000000	35.84	720.28	1439.81	8.75
(K)DLGEEHFK(G)	2	10.02	89.3	10700000	21.22	487.74	974.458	4.65
(K)VPQVSTPTLVEVSR(S)	2	9.93	84.9	195000000	35.27	756.32	1511.84	5.97
(K)LGEYGFQNALIVR(Y)	2	9.83	87.1	1640000000	43.56	740.44	1479.8	6
(R)ETYGDMADCCEK(Q)	2	9.65	92.9	15500000	22.22	739.98	1478.52	3.91
(R)RHPYFYAPELLYYANK(Y)	2	9.65	73.5	34700000	46.04	1022.85	2045.03	8.39
(R)RPCFSALTPDETYVPK(A)	2	9.64	66.2	219000000	36.62	940.94	1880.92	6.07
(K)DDSPDLPK(L)	2	9.53	82.4	4670000	17.53	443.65	886.415	3.93
(K)DAFLGSFLYEYSR(R)	2	9.5	81.8	41000000	54.52	784.22	1567.74	4.37
(K)DDSPDLPK(L)	2	9.44	75.2	8410000	3.56	443.68	886.415	3.93
(R)NECFLSHK(D)	2	9.38	67.1	6070000	20.07	517.72	1034.47	6.75
(K)QTALVELLK(H)	2	9.21	91.6	287000000	41.49	507.83	1014.62	6
(K)TCVADESHAGCEK(S)	3	9.2	62.4	2530000	4.85	488.76	1463.59	4.65
(R)HPYFYAPELLYYANK(Y)	2	9.19	79.3	107000000	48.62	945.26	1888.93	6.75
(K)GLVLIAFSQYLQQCPFDEHVK(L)	2	9.11	68.5	9720000	59.82	1247	2492.26	5.32
(R)RHPEYAVSVLLR(L)	2	8.96	65.4	276000000	35.75	720.49	1439.81	8.75
(K)DLGEEHFK(G)	2	8.92	84.4	5860000	11.05	487.62	974.458	4.65
(R)NECFLSHK(D)	2	8.92	61	6130000	19.56	517.93	1034.47	6.75
(K)SHCIAEVEK(D)	2	8.91	63.2	2860000	9.89	536.69	1072.51	5.38
(K)YICDNQDTISSK(L)	2	8.9	73.8	46100000	19.63	722.24	1443.64	4.21
(K)DAFLGSFLYEYSR(R)	2	8.82	82.3	265000000	53.96	784.43	1567.74	4.37
(R)ETYGDMADCCEK(Q)	2	8.73	76	6670000	9.47	739.58	1478.52	3.91
(K)EYEATLEECCAK(D)	2	8.67	76.8	17500000	24.01	751.74	1502.61	4.09
(K)SHCIAEVEK(D)	2	8.59	67.1	3210000	9.23	536.81	1072.51	5.38
(K)YLYEIAR(R)	2	8.2	96.6	238000000	30.64	464.35	927.493	6
(R)LCVLHEK(T)	2	8.18	61.4	13000000	4.1	449.76	898.481	6.75
(K)YNGVFQECCQAEDK(G)	2	8.12	77.2	46900000	28.3	874.69	1747.7	4.14
(R)NECFLSHKDDSPDLPK(L)	3	8.09	66.1	43900000	29.31	634.87	1901.87	4.66
(K)DLGEEHFK(G)	2	8.04	62.3	7190000	7.99	487.73	974.458	4.65
(R)KVPQVSTPTLVEVSR(S)	2	7.98	87.9	789000000	34.04	820.4	1639.94	8.75
(R)ETYGDMADCCEK(Q)	2	7.9	72.7	5750000	6.95	739.55	1478.52	3.91
(K)DDPHACYSTVFDK(L)	3	7.89	60.6	22500000	30	518.97	1554.65	4.41
(K)TVMENFVAFVDK(C)	2	7.87	83.2	1250000000	50.95	700.37	1399.69	4.37
(R)ETYGDMADCCEK(Q)	2	7.81	95.3	9960000	8.69	740.14	1478.52	3.91
(K)HLVDEPQNLIK(Q)	2	7.79	92.4	580000000	31.39	653.34	1305.72	5.32
(K)LVTDLTK(V)	2	7.76	89.1	22500000	17.8	395.24	789.472	5.84
(K)DDPHACYSTVFDK(L)	2	7.72	68.4	54500000	29.88	777.73	1554.65	4.41
(K)GLVLIAFSQYLQQCPFDEHVK(L)	3	7.68	89.2	181000000	60.01	831.68	2492.26	5.32
(K)TVmENFVAFVDK(C)	2	7.67	65.4	44500000	42.28	708.21	1399.69	4.37
(R)ETYGDMADCCEK(Q)	2	7.43	79.6	6260000	9.54	739.69	1478.52	3.91
(R)RPCFSALTPDETYVPK(A)	2	7.39	75.5	224000000	36.69	940.96	1880.92	6.07
(K)SHCIAEVEK(D)	2	7.18	73.3	1850000	11.61	536.7	1072.51	5.38
(K)LVTDLTK(V)	2	7.17	94.9	49600000	13.14	395.16	789.472	5.84
(K)SHCIAEVEK(D)	2	6.84	73.3	2180000	11.38	536.69	1072.51	5.38
(R)ETYGDMADCCEK(Q)	2	6.56	73.8	14400000	22.28	739.7	1478.52	3.91
(K)DAFLGSFLYEYSR(R)	2	6.21	69.9	11500000	57.35	784.21	1567.74	4.37
(K)YICDNQDTISSK(L)	2	6.19	89.1	123000000	3.53	722.42	1443.64	4.21
(R)HPEYAVSVLLR(L)	2	6.18	71.2	78600000	38.95	641.58	1283.71	6.75
(K)YNGVFQECCQAEDK(G)	2	6.04	86.5	44900000	27.81	874.14	1747.7	4.14

## Sheet: 0 site-TAMSP ATRP before-03
Accession	Protein name	Species	Protein MW(Da)	Coverage (%)	Spectra	Unique peptides	MS/MS Search (score)	Mean peptide Spectral Intensity
P02769	serum albumin	BOVIN	71289	62.1	69	32	410.68	49600000
Sequence	z	Score	SPI	Spectrum	RT	m/z	MH+	Peptide pI
			(%)	Intensity	(min)	Measured	Matched
						(Da)	(Da)
(K)DAFLGSFLYEYSR(R)	2	19.37	97.1	605000000	52.61	784.39	1567.74	4.37
(R)RPCFSALTPDETYVPK(A)	3	17.82	95.6	74400000	36.95	627.91	1880.92	6.07
(K)LGEYGFQNALIVR(Y)	2	17.32	96	492000000	42.5	740.46	1479.8	6
(K)DAFLGSFLYEYSR(R)	3	16.96	90.4	12200000	52.74	523.59	1567.74	4.37
(R)HPYFYAPELLYYANK(Y)	3	16.42	91.2	35400000	48.77	630.62	1888.93	6.75
(K)HLVDEPQNLIK(Q)	2	16.33	94.4	122000000	31.47	653.4	1305.72	5.32
(K)LFTFHADICTLPDTEK(Q)	2	16.32	91.6	59400000	43.16	954.49	1907.92	4.54
(K)HLVDEPQNLIK(Q)	3	16.3	93.2	13100000	31.66	436.1	1305.72	5.32
(K)GLVLIAFSQYLQQCPFDEHVK(L)	4	16.04	84.8	12300000	59.58	624.04	2492.26	5.32
(K)LGEYGFQNALIVR(Y)	3	15.84	83.7	12300000	43.54	494.13	1479.8	6
(K)LFTFHADICTLPDTEK(Q)	3	15.55	87.4	140000000	43.04	636.88	1907.92	4.54
(K)SLHTLFGDELCK(V)	2	15.33	83.3	48900000	39.68	710.25	1419.69	5.3
(R)MPCTEDYLSLILNR(L)	2	15.19	87.1	156000000	53.32	862.95	1724.84	4.37
(K)LVNELTEFAK(T)	2	15.13	94.1	177000000	37.95	582.37	1163.63	4.53
(K)YICDNQDTISSK(L)	2	14.89	92.1	44600000	20.11	722.3	1443.64	4.21
(K)TVMENFVAFVDK(C)	2	14.83	93.9	327000000	50.63	700.32	1399.69	4.37
(R)MPCTEDYLSLILNR(L)	3	14.5	100	20900000	53.48	575.83	1724.84	4.37
(K)SLHTLFGDELCK(V)	3	14.38	89.5	25100000	39.84	474.14	1419.69	5.3
(K)LKPDPNTLCDEFK(A)	3	14.3	90.4	22300000	34.08	526.49	1576.77	4.56
(K)SLHTLFGDELCK(V)	3	14.03	70.1	25100000	39.78	474.09	1419.69	5.3
(K)VPQVSTPTLVEVSR(S)	2	13.88	89.4	44200000	35.6	756.51	1511.84	5.97
(K)ECCHGDLLECADDR(A)	3	13.69	91	5030000	27.83	583.91	1749.66	4.1
(K)DAIPENLPPLTADFAEDK(D)	3	13.18	86.1	7080000	45.57	652.68	1955.96	3.77
(K)LKPDPNTLCDEFK(A)	2	13.15	95.6	50100000	33.98	788.89	1576.77	4.56
(K)LVVSTQTALA(-)	2	13.11	81.9	27300000	31.82	501.81	1002.58	5.52
(K)AEFVEVTK(L)	2	13.1	90.7	52900000	23.59	461.74	922.488	4.53
(R)HPYFYAPELLYYANK(Y)	2	13.04	87	29500000	48.8	945.01	1888.93	6.75
(K)DLGEEHFK(G)	2	12.77	90	4130000	20.87	487.8	974.458	4.65
(K)DAIPENLPPLTADFAEDK(D)	2	12.74	89.6	16600000	45.45	978.46	1955.96	3.77
(K)YICDNQDTISSK(L)	2	12.27	92.1	34700000	21.44	722.73	1443.64	4.21
(K)EACFAVEGPK(L)	2	12.02	91.4	6890000	26.25	554.28	1107.51	4.53
(K)GACLLPK(I)	2	11.57	82.6	4060000	22.7	379.73	758.423	8.75
(K)DDPHACYSTVFDK(L)	3	11.23	64.7	5720000	30.48	518.98	1554.65	4.41
(K)TCVADESHAGCEK(S)	2	11.17	77.2	4480000	1.99	732.26	1463.59	4.65
(K)YICDNQDTISSK(L)	2	10.93	82.9	34700000	21.34	722.35	1443.64	4.21
(K)YNGVFQECCQAEDK(G)	2	10.83	94.9	9870000	28.51	874.33	1747.7	4.14
(K)DAFLGSFLYEYSR(R)	2	10.19	65.8	11400000	55.6	784.45	1567.74	4.37
(K)YICDNQDTISSK(L)	2	9.86	73.4	12100000	3.97	722.47	1443.64	4.21
(K)DAFLGSFLYEYSR(R)	2	9.47	68	34900000	54.25	785.12	1567.74	4.37
(K)QTALVELLK(H)	2	9.36	84.1	55500000	41.89	507.81	1014.62	6
(K)YICDNQDTISSK(L)	2	8.9	66.9	41100000	20.84	722.44	1443.64	4.21
(K)LVNELTEFAK(T)	2	8.82	90.2	173000000	38.6	582.29	1163.63	4.53
(R)HPEYAVSVLLR(L)	2	8.69	89.4	20200000	39.46	642.39	1283.71	6.75
(R)RPCFSALTPDETYVPK(A)	2	8.68	76	66400000	36.98	940.93	1880.92	6.07
(K)DAFLGSFLYEYSR(R)	2	8.68	63.6	13500000	55.2	784.33	1567.74	4.37
(K)CCTESLVNR(R)	2	8.59	73.8	1910000	3.68	569.67	1138.5	6
(K)DAFLGSFLYEYSR(R)	2	8.59	67.9	15000000	54.86	784.35	1567.74	4.37
(K)YICDNQDTISSK(L)	2	8.45	66	8870000	18.79	722.28	1443.64	4.21
(R)ETYGDMADCCEK(Q)	2	8.21	84.2	6210000	22.18	739.67	1478.52	3.91
(K)YLYEIAR(R)	2	8.2	97.2	53000000	31.34	464.31	927.493	6
(K)TVMENFVAFVDK(C)	3	8.08	85.1	3130000	50.85	467.63	1399.69	4.37
(K)CCTESLVNR(R)	2	8.05	73	2770000	19.62	569.65	1138.5	6
(K)LVTDLTK(V)	2	7.86	94.5	8380000	16.29	395.24	789.472	5.84
(K)LVTDLTK(V)	2	7.86	94.9	21800000	20.36	395.18	789.472	5.84
(K)LVTDLTK(V)	2	7.81	92.2	10300000	18.36	395.26	789.472	5.84
(K)DDSPDLPK(L)	2	7.36	67.1	982000	3.48	443.72	886.415	3.93
(K)DAFLGSFLYEYSR(R)	2	7.28	60.4	9340000	56.5	784.9	1567.74	4.37
(R)HPEYAVSVLLR(L)	2	7.05	86.5	20100000	39.56	642.33	1283.71	6.75
(K)DLGEEHFK(G)	2	7.01	88.2	2990000	21.98	487.79	974.458	4.65
(K)YICDNQDTISSK(L)	2	6.95	66.4	11900000	4.07	722.25	1443.64	4.21
(K)YICDNQDTISSK(L)	2	6.67	82	11700000	3.34	722.44	1443.64	4.21
(K)DDPHACYSTVFDK(L)	2	6.67	76.5	13600000	30.55	777.87	1554.65	4.41
(R)LCVLHEK(T)	2	6.57	61.5	2000000	4.72	450.12	898.481	6.75
(K)CCTESLVNR(R)	2	6.47	68	2690000	18.89	569.77	1138.5	6
(K)YICDNQDTISSK(L)	2	6.37	79.4	11500000	3.24	722.35	1443.64	4.21
(R)ETYGDMADCCEK(Q)	2	6.37	72.1	6180000	22.45	739.98	1478.52	3.91
(R)LCVLHEK(T)	2	6.36	93.2	1490000	19.21	449.75	898.481	6.75
(K)DAFLGSFLYEYSR(R)	2	6.14	70.4	9200000	56.36	784.5	1567.74	4.37
(K)TCVADESHAGCEK(S)	3	6.06	67.1	1190000	3.9	488.5	1463.59	4.65

## Sheet: 1 site-TAMSP ATRP before-03
Accession	Protein name	Species	Protein MW(Da)	Coverage (%)	Spectra	Unique peptides	MS/MS Search (score)	Mean peptide Spectral Intensity
P02769	serum albumin	BOVIN	71289	66.5	86	40	528.02	52800000
Sequence	z	Score	SPI	Spectrum	RT	m/z	MH+	Peptide pI
			(%)	Intensity	(min)	Measured	Matched
						(Da)	(Da)
(R)RHPYFYAPELLYYANK(Y)	3	20.45	92.5	10800000	46.55	682.54	2045.03	8.39
(K)DAFLGSFLYEYSR(R)	2	19.37	97.1	605000000	52.61	784.39	1567.74	4.37
(R)RHPEYAVSVLLR(L)	3	18.99	95.5	27400000	36.79	480.82	1439.81	8.75
(R)RPCFSALTPDETYVPK(A)	3	17.82	95.6	74400000	36.95	627.91	1880.92	6.07
(K)LGEYGFQNALIVR(Y)	2	17.32	96	492000000	42.5	740.46	1479.8	6
(R)RHPYFYAPELLYYANK(Y)	2	17.05	91	9740000	46.65	1023.01	2045.03	8.39
(K)DAFLGSFLYEYSR(R)	3	16.96	90.4	12200000	52.74	523.59	1567.74	4.37
(R)HPYFYAPELLYYANK(Y)	3	16.42	91.2	35400000	48.77	630.62	1888.93	6.75
(K)HLVDEPQNLIK(Q)	2	16.33	94.4	122000000	31.47	653.4	1305.72	5.32
(K)LFTFHADICTLPDTEK(Q)	2	16.32	91.6	59400000	43.16	954.49	1907.92	4.54
(K)HLVDEPQNLIK(Q)	3	16.3	93.2	13100000	31.66	436.1	1305.72	5.32
(R)FKDLGEEHFK(G)	2	16.27	92.1	5990000	25.92	625.31	1249.62	5.44
(R)FKDLGEEHFK(G)	3	16.12	84	4650000	26.45	417.36	1249.62	5.44
(K)GLVLIAFSQYLQQCPFDEHVK(L)	4	16.04	84.8	12300000	59.58	624.04	2492.26	5.32
(K)LGEYGFQNALIVR(Y)	3	15.84	83.7	12300000	43.54	494.13	1479.8	6
(K)LFTFHADICTLPDTEK(Q)	3	15.55	87.4	140000000	43.04	636.88	1907.92	4.54
(K)SLHTLFGDELCK(V)	2	15.33	83.3	48900000	39.68	710.25	1419.69	5.3
(R)MPCTEDYLSLILNR(L)	2	15.19	87.1	156000000	53.32	862.95	1724.84	4.37
(K)LVNELTEFAK(T)	2	15.13	94.1	177000000	37.95	582.37	1163.63	4.53
(R)KVPQVSTPTLVEVSR(S)	3	15.11	77.5	107000000	34.15	547.58	1639.94	8.75
(K)YICDNQDTISSK(L)	2	14.89	92.1	44600000	20.11	722.3	1443.64	4.21
(K)TVMENFVAFVDK(C)	2	14.83	93.9	327000000	50.63	700.32	1399.69	4.37
(R)MPCTEDYLSLILNR(L)	3	14.5	100	20900000	53.48	575.83	1724.84	4.37
(K)SLHTLFGDELCK(V)	3	14.38	89.5	25100000	39.84	474.14	1419.69	5.3
(K)LKPDPNTLCDEFK(A)	3	14.3	90.4	22300000	34.08	526.49	1576.77	4.56
(R)KVPQVSTPTLVEVSR(S)	3	14.13	84.7	106000000	34.24	547.47	1639.94	8.75
(K)SLHTLFGDELCK(V)	3	14.03	70.1	25100000	39.78	474.09	1419.69	5.3
(K)VPQVSTPTLVEVSR(S)	2	13.88	89.4	44200000	35.6	756.51	1511.84	5.97
(K)KQTALVELLK(H)	2	13.73	91.7	15800000	37.91	571.91	1142.71	8.59
(K)ECCHGDLLECADDR(A)	3	13.69	91	5030000	27.83	583.91	1749.66	4.1
(K)DAIPENLPPLTADFAEDK(D)	3	13.18	86.1	7080000	45.57	652.68	1955.96	3.77
(K)LKPDPNTLCDEFK(A)	2	13.15	95.6	50100000	33.98	788.89	1576.77	4.56
(K)LVVSTQTALA(-)	2	13.11	81.9	27300000	31.82	501.81	1002.58	5.52
(K)AEFVEVTK(L)	2	13.1	90.7	52900000	23.59	461.74	922.488	4.53
(R)HPYFYAPELLYYANK(Y)	2	13.04	87	29500000	48.8	945.01	1888.93	6.75
(K)DLGEEHFK(G)	2	12.77	90	4130000	20.87	487.8	974.458	4.65
(K)DAIPENLPPLTADFAEDK(D)	2	12.74	89.6	16600000	45.45	978.46	1955.96	3.77
(R)NECFLSHKDDSPDLPK(L)	2	12.35	75.3	5230000	29.9	951.95	1901.87	4.66
(K)YICDNQDTISSK(L)	2	12.27	92.1	34700000	21.44	722.73	1443.64	4.21
(K)DAIPENLPPLTADFAEDKDVCK(N)	2	12.22	79.9	11400000	44.19	1230.4	2458.18	3.96
(R)KVPQVSTPTLVEVSR(S)	2	12.15	85.9	285000000	33.95	820.49	1639.94	8.75
(R)RHPEYAVSVLLR(L)	2	12.03	88.3	82400000	36.75	720.44	1439.81	8.75
(K)EACFAVEGPK(L)	2	12.02	91.4	6890000	26.25	554.28	1107.51	4.53
(K)GACLLPK(I)	2	11.57	82.6	4060000	22.7	379.73	758.423	8.75
(K)DDPHACYSTVFDK(L)	3	11.23	64.7	5720000	30.48	518.98	1554.65	4.41
(K)TCVADESHAGCEK(S)	2	11.17	77.2	4480000	1.99	732.26	1463.59	4.65
(K)YICDNQDTISSK(L)	2	10.93	82.9	34700000	21.34	722.35	1443.64	4.21
(K)YNGVFQECCQAEDK(G)	2	10.83	94.9	9870000	28.51	874.33	1747.7	4.14
(K)DAFLGSFLYEYSR(R)	2	10.19	65.8	11400000	55.6	784.45	1567.74	4.37
(K)YICDNQDTISSK(L)	2	9.86	73.4	12100000	3.97	722.47	1443.64	4.21
(R)NECFLSHKDDSPDLPK(L)	3	9.71	74.1	5890000	29.8	634.79	1901.87	4.66
(K)DAFLGSFLYEYSR(R)	2	9.47	68	34900000	54.25	785.12	1567.74	4.37
(K)QTALVELLK(H)	2	9.36	84.1	55500000	41.89	507.81	1014.62	6
(R)RHPEYAVSVLLR(L)	2	9.08	79.6	83600000	36.66	720.85	1439.81	8.75
(K)YICDNQDTISSK(L)	2	8.9	66.9	41100000	20.84	722.44	1443.64	4.21
(K)LVNELTEFAK(T)	2	8.82	90.2	173000000	38.6	582.29	1163.63	4.53
(R)NECFLSHKDDSPDLPK(L)	3	8.81	75.4	5860000	29.99	634.67	1901.87	4.66
(R)HPEYAVSVLLR(L)	2	8.69	89.4	20200000	39.46	642.39	1283.71	6.75
(R)RPCFSALTPDETYVPK(A)	2	8.68	76	66400000	36.98	940.93	1880.92	6.07
(K)DAFLGSFLYEYSR(R)	2	8.68	63.6	13500000	55.2	784.33	1567.74	4.37
(K)CCTESLVNR(R)	2	8.59	73.8	1910000	3.68	569.67	1138.5	6
(K)DAFLGSFLYEYSR(R)	2	8.59	67.9	15000000	54.86	784.35	1567.74	4.37
(R)FKDLGEEHFK(G)	3	8.5	62.2	4600000	25.86	417.25	1249.62	5.44
(K)YICDNQDTISSK(L)	2	8.45	66	8870000	18.79	722.28	1443.64	4.21
(K)SHCIAEVEKDAIPENLPPLTADFAEDK(D)	4	8.43	78.5	28900000	45.74	753.29	3009.45	4.19
(K)SHCIAEVEKDAIPENLPPLTADFAEDK(D)	4	8.32	75.9	29000000	45.83	753.3	3009.45	4.19
(R)ETYGDMADCCEK(Q)	2	8.21	84.2	6210000	22.18	739.67	1478.52	3.91
(K)YLYEIAR(R)	2	8.2	97.2	53000000	31.34	464.31	927.493	6
(K)TVMENFVAFVDK(C)	3	8.08	85.1	3130000	50.85	467.63	1399.69	4.37
(K)CCTESLVNR(R)	2	8.05	73	2770000	19.62	569.65	1138.5	6
(K)LVTDLTK(V)	2	7.86	94.5	8380000	16.29	395.24	789.472	5.84
(K)LVTDLTK(V)	2	7.86	94.9	21800000	20.36	395.18	789.472	5.84
(K)LVTDLTK(V)	2	7.81	92.2	10300000	18.36	395.26	789.472	5.84
(K)DDSPDLPK(L)	2	7.36	67.1	982000	3.48	443.72	886.415	3.93
(K)DAFLGSFLYEYSR(R)	2	7.28	60.4	9340000	56.5	784.9	1567.74	4.37
(R)HPEYAVSVLLR(L)	2	7.05	86.5	20100000	39.56	642.33	1283.71	6.75
(K)DLGEEHFK(G)	2	7.01	88.2	2990000	21.98	487.79	974.458	4.65
(K)YICDNQDTISSK(L)	2	6.95	66.4	11900000	4.07	722.25	1443.64	4.21
(K)YICDNQDTISSK(L)	2	6.67	82	11700000	3.34	722.44	1443.64	4.21
(K)DDPHACYSTVFDK(L)	2	6.67	76.5	13600000	30.55	777.87	1554.65	4.41
(K)YICDNQDTISSK(L)	2	6.37	79.4	11500000	3.24	722.35	1443.64	4.21
(R)ETYGDMADCCEK(Q)	2	6.37	72.1	6180000	22.45	739.98	1478.52	3.91
(R)LCVLHEK(T)	2	6.36	93.2	1490000	19.21	449.75	898.481	6.75
(R)KVPQVSTPTLVEVSR(S)	2	6.3	69.5	289000000	34.62	820.57	1639.94	8.75
(R)FKDLGEEHFK(G)	2	6.19	67.6	5580000	25.82	625.33	1249.62	5.44
(K)TCVADESHAGCEK(S)	3	6.06	67.1	1190000	3.9	488.5	1463.59	4.65

## Sheet: 2 site-TAMSP ATRP before-03
Accession	Protein name	Species	Protein MW(Da)	Coverage (%)	Spectra	Unique peptides	MS/MS Search (score)	Mean peptide Spectral Intensity
P02769	serum albumin	BOVIN	71289	66.5	83	41	545.22	54600000
Sequence	z	Score	SPI	Spectrum	RT	m/z	MH+	Peptide pI
			(%)	Intensity	(min)	Measured	Matched
						(Da)	(Da)
(R)RHPYFYAPELLYYANK(Y)	3	20.45	92.5	10800000	46.55	682.54	2045.03	8.39
(K)DAFLGSFLYEYSR(R)	2	19.37	97.1	605000000	52.61	784.39	1567.74	4.37
(R)RHPEYAVSVLLR(L)	3	18.99	95.5	27400000	36.79	480.82	1439.81	8.75
(R)RPCFSALTPDETYVPK(A)	3	17.82	95.6	74400000	36.95	627.91	1880.92	6.07
(K)LGEYGFQNALIVR(Y)	2	17.32	96	492000000	42.5	740.46	1479.8	6
(K)SHCIAEVEKDAIPENLPPLTADFAEDKDVCK(N)	4	17.2	89.5	30200000	44.51	878.98	3511.67	4.28
(R)RHPYFYAPELLYYANK(Y)	2	17.05	91	9740000	46.65	1023.01	2045.03	8.39
(K)DAFLGSFLYEYSR(R)	3	16.96	90.4	12200000	52.74	523.59	1567.74	4.37
(R)HPYFYAPELLYYANK(Y)	3	16.42	91.2	35400000	48.77	630.62	1888.93	6.75
(K)HLVDEPQNLIK(Q)	2	16.33	94.4	122000000	31.47	653.4	1305.72	5.32
(K)LFTFHADICTLPDTEK(Q)	2	16.32	91.6	59400000	43.16	954.49	1907.92	4.54
(K)HLVDEPQNLIK(Q)	3	16.3	93.2	13100000	31.66	436.1	1305.72	5.32
(R)FKDLGEEHFK(G)	2	16.27	92.1	5990000	25.92	625.31	1249.62	5.44
(R)FKDLGEEHFK(G)	3	16.12	84	4650000	26.45	417.36	1249.62	5.44
(K)GLVLIAFSQYLQQCPFDEHVK(L)	4	16.04	84.8	12300000	59.58	624.04	2492.26	5.32
(K)LGEYGFQNALIVR(Y)	3	15.84	83.7	12300000	43.54	494.13	1479.8	6
(K)LFTFHADICTLPDTEK(Q)	3	15.55	87.4	140000000	43.04	636.88	1907.92	4.54
(K)SLHTLFGDELCK(V)	2	15.33	83.3	48900000	39.68	710.25	1419.69	5.3
(R)MPCTEDYLSLILNR(L)	2	15.19	87.1	156000000	53.32	862.95	1724.84	4.37
(K)LVNELTEFAK(T)	2	15.13	94.1	177000000	37.95	582.37	1163.63	4.53
(R)KVPQVSTPTLVEVSR(S)	3	15.11	77.5	107000000	34.15	547.58	1639.94	8.75
(K)YICDNQDTISSK(L)	2	14.89	92.1	44600000	20.11	722.3	1443.64	4.21
(K)TVMENFVAFVDK(C)	2	14.83	93.9	327000000	50.63	700.32	1399.69	4.37
(R)MPCTEDYLSLILNR(L)	3	14.5	100	20900000	53.48	575.83	1724.84	4.37
(K)SLHTLFGDELCK(V)	3	14.38	89.5	25100000	39.84	474.14	1419.69	5.3
(K)LKPDPNTLCDEFK(A)	3	14.3	90.4	22300000	34.08	526.49	1576.77	4.56
(R)KVPQVSTPTLVEVSR(S)	3	14.13	84.7	106000000	34.24	547.47	1639.94	8.75
(K)SLHTLFGDELCK(V)	3	14.03	70.1	25100000	39.78	474.09	1419.69	5.3
(K)VPQVSTPTLVEVSR(S)	2	13.88	89.4	44200000	35.6	756.51	1511.84	5.97
(K)KQTALVELLK(H)	2	13.73	91.7	15800000	37.91	571.91	1142.71	8.59
(K)ECCHGDLLECADDR(A)	3	13.69	91	5030000	27.83	583.91	1749.66	4.1
(K)DAIPENLPPLTADFAEDK(D)	3	13.18	86.1	7080000	45.57	652.68	1955.96	3.77
(K)LKPDPNTLCDEFK(A)	2	13.15	95.6	50100000	33.98	788.89	1576.77	4.56
(K)LVVSTQTALA(-)	2	13.11	81.9	27300000	31.82	501.81	1002.58	5.52
(K)AEFVEVTK(L)	2	13.1	90.7	52900000	23.59	461.74	922.488	4.53
(R)HPYFYAPELLYYANK(Y)	2	13.04	87	29500000	48.8	945.01	1888.93	6.75
(K)DLGEEHFK(G)	2	12.77	90	4130000	20.87	487.8	974.458	4.65
(K)DAIPENLPPLTADFAEDK(D)	2	12.74	89.6	16600000	45.45	978.46	1955.96	3.77
(R)NECFLSHKDDSPDLPK(L)	2	12.35	75.3	5230000	29.9	951.95	1901.87	4.66
(K)YICDNQDTISSK(L)	2	12.27	92.1	34700000	21.44	722.73	1443.64	4.21
(K)DAIPENLPPLTADFAEDKDVCK(N)	2	12.22	79.9	11400000	44.19	1230.4	2458.18	3.96
(R)KVPQVSTPTLVEVSR(S)	2	12.15	85.9	285000000	33.95	820.49	1639.94	8.75
(R)RHPEYAVSVLLR(L)	2	12.03	88.3	82400000	36.75	720.44	1439.81	8.75
(K)EACFAVEGPK(L)	2	12.02	91.4	6890000	26.25	554.28	1107.51	4.53
(K)GACLLPK(I)	2	11.57	82.6	4060000	22.7	379.73	758.423	8.75
(K)DDPHACYSTVFDK(L)	3	11.23	64.7	5720000	30.48	518.98	1554.65	4.41
(K)TCVADESHAGCEK(S)	2	11.17	77.2	4480000	1.99	732.26	1463.59	4.65
(K)YICDNQDTISSK(L)	2	10.93	82.9	34700000	21.34	722.35	1443.64	4.21
(K)YNGVFQECCQAEDK(G)	2	10.83	94.9	9870000	28.51	874.33	1747.7	4.14
(K)DAFLGSFLYEYSR(R)	2	10.19	65.8	11400000	55.6	784.45	1567.74	4.37
(K)YICDNQDTISSK(L)	2	9.86	73.4	12100000	3.97	722.47	1443.64	4.21
(R)NECFLSHKDDSPDLPK(L)	3	9.71	74.1	5890000	29.8	634.79	1901.87	4.66
(K)DAFLGSFLYEYSR(R)	2	9.47	68	34900000	54.25	785.12	1567.74	4.37
(K)QTALVELLK(H)	2	9.36	84.1	55500000	41.89	507.81	1014.62	6
(R)RHPEYAVSVLLR(L)	2	9.08	79.6	83600000	36.66	720.85	1439.81	8.75
(K)YICDNQDTISSK(L)	2	8.9	66.9	41100000	20.84	722.44	1443.64	4.21
(K)LVNELTEFAK(T)	2	8.82	90.2	173000000	38.6	582.29	1163.63	4.53
(R)NECFLSHKDDSPDLPK(L)	3	8.81	75.4	5860000	29.99	634.67	1901.87	4.66
(R)HPEYAVSVLLR(L)	2	8.69	89.4	20200000	39.46	642.39	1283.71	6.75
(R)RPCFSALTPDETYVPK(A)	2	8.68	76	66400000	36.98	940.93	1880.92	6.07
(K)DAFLGSFLYEYSR(R)	2	8.68	63.6	13500000	55.2	784.33	1567.74	4.37
(K)CCTESLVNR(R)	2	8.59	73.8	1910000	3.68	569.67	1138.5	6
(K)DAFLGSFLYEYSR(R)	2	8.59	67.9	15000000	54.86	784.35	1567.74	4.37
(R)FKDLGEEHFK(G)	3	8.5	62.2	4600000	25.86	417.25	1249.62	5.44
(K)YICDNQDTISSK(L)	2	8.45	66	8870000	18.79	722.28	1443.64	4.21
(K)SHCIAEVEKDAIPENLPPLTADFAEDK(D)	4	8.43	78.5	28900000	45.74	753.29	3009.45	4.19
(R)ETYGDMADCCEK(Q)	2	8.21	84.2	6210000	22.18	739.67	1478.52	3.91
(K)YLYEIAR(R)	2	8.2	97.2	53000000	31.34	464.31	927.493	6
(K)TVMENFVAFVDK(C)	3	8.08	85.1	3130000	50.85	467.63	1399.69	4.37
(K)CCTESLVNR(R)	2	8.05	73	2770000	19.62	569.65	1138.5	6
(K)LVTDLTK(V)	2	7.86	94.5	8380000	16.29	395.24	789.472	5.84
(K)LVTDLTK(V)	2	7.86	94.9	21800000	20.36	395.18	789.472	5.84
(K)LVTDLTK(V)	2	7.81	92.2	10300000	18.36	395.26	789.472	5.84
(K)DDSPDLPK(L)	2	7.36	67.1	982000	3.48	443.72	886.415	3.93
(K)DAFLGSFLYEYSR(R)	2	7.28	60.4	9340000	56.5	784.9	1567.74	4.37
(R)HPEYAVSVLLR(L)	2	7.05	86.5	20100000	39.56	642.33	1283.71	6.75
(K)YICDNQDTISSK(L)	2	6.95	66.4	11900000	4.07	722.25	1443.64	4.21
(K)YICDNQDTISSK(L)	2	6.67	82	11700000	3.34	722.44	1443.64	4.21
(K)DDPHACYSTVFDK(L)	2	6.67	76.5	13600000	30.55	777.87	1554.65	4.41
(K)YICDNQDTISSK(L)	2	6.37	79.4	11500000	3.24	722.35	1443.64	4.21
(R)ETYGDMADCCEK(Q)	2	6.37	72.1	6180000	22.45	739.98	1478.52	3.91
(R)LCVLHEK(T)	2	6.36	93.2	1490000	19.21	449.75	898.481	6.75
(R)KVPQVSTPTLVEVSR(S)	2	6.3	69.5	289000000	34.62	820.57	1639.94	8.75
