# Supplementary material for: Preparation of trypsin aptamer modified silica particles by surface initiated atom transfer radical polymerization for proteome identification
Source: Royal Society of Chemistry journal article supplement (doi:10.1039/c5ay02080h), 2016-01-01
Supplement: c5ay02080h4.xlsx [file c5ay02080h4.xlsx]

## Sheet: 0 site-TAMSP ATRP after-01
Accession	Protein name	Species	Protein MW(Da)	Coverage (%)	Spectra	Unique peptides	MS/MS Search (score)	Mean peptide Spectral Intensity
P02769	serum albumin	BOVIN	71289	54.3	65	27	353.81	166000000
Sequence	z	Score	SPI	Spectrum	RT	m/z	MH+	Peptide pI
			(%)	Intensity	(min)	Measured	Matched
						(Da)	(Da)
(K)DAFLGSFLYEYSR(R)	2	19.38	97.3	819000000	52.69	784.28	1567.74	4.37
(K)LGEYGFQNALIVR(Y)	2	16.14	91.6	1720000000	43.21	740.37	1479.8	6
(K)LVVSTQTALA(-)	2	16.07	90.1	74100000	31.53	501.76	1002.58	5.52
(K)SLHTLFGDELCK(V)	2	15.88	88.5	127000000	39.5	710.35	1419.69	5.3
(K)ECCHGDLLECADDR(A)	3	15.6	92.5	14900000	27.03	583.95	1749.66	4.1
(R)MPCTEDYLSLILNR(L)	3	15.56	93.8	64500000	53.53	575.68	1724.84	4.37
(K)LGEYGFQNALIVR(Y)	3	15.52	83.9	36100000	43.42	494.55	1479.8	6
(K)HLVDEPQNLIK(Q)	2	15.17	88.5	331000000	31.04	653.38	1305.72	5.32
(K)HLVDEPQNLIK(Q)	3	15.17	91.7	22200000	31.32	436.09	1305.72	5.32
(K)SLHTLFGDELCK(V)	3	15.14	82.8	42200000	39.62	474.05	1419.69	5.3
(R)HPYFYAPELLYYANK(Y)	3	14.88	87	49500000	48.83	630.34	1888.93	6.75
(R)MPCTEDYLSLILNR(L)	2	14.85	84.7	364000000	53.42	862.76	1724.84	4.37
(K)LVNELTEFAK(T)	2	14.61	92.6	723000000	37.61	582.24	1163.63	4.53
(R)RPCFSALTPDETYVPK(A)	3	14.35	88.7	300000000	36.72	627.85	1880.92	6.07
(K)CCTESLVNR(R)	2	13.59	86.1	5580000	3.83	569.67	1138.5	6
(K)GLVLIAFSQYLQQCPFDEHVK(L)	3	13.4	97.2	39100000	59.71	831.85	2492.26	5.32
(K)DLGEEHFK(G)	2	13.07	91.2	8510000	7.34	487.7	974.458	4.65
(K)LFTFHADICTLPDTEK(Q)	2	12.78	81.5	103000000	43.05	954.39	1907.92	4.54
(K)GACLLPK(I)	2	12.65	84.1	4960000	21.79	379.66	758.423	8.75
(K)TVMENFVAFVDK(C)	3	12.65	82.4	5550000	50.77	467.35	1399.69	4.37
(K)YICDNQDTISSK(L)	2	12.61	79.6	80300000	20.18	722.33	1443.64	4.21
(K)GACLLPK(I)	2	12.6	82.4	4490000	24.44	379.74	758.423	8.75
(R)ETYGDMADCCEK(Q)	2	12.3	88.5	10600000	5	739.62	1478.52	3.91
(K)GLVLIAFSQYLQQCPFDEHVK(L)	4	12.02	81.1	7190000	59.9	623.91	2492.26	5.32
(K)TVMENFVAFVDK(C)	2	11.86	80.1	653000000	50.65	700.39	1399.69	4.37
(K)DDPHACYSTVFDK(L)	3	11.85	66.6	20900000	30.08	519.04	1554.65	4.41
(K)VPQVSTPTLVEVSR(S)	2	11.85	84.1	90700000	35.59	756.42	1511.84	5.97
(K)LFTFHADICTLPDTEK(Q)	3	11.67	77.3	299000000	42.96	636.86	1907.92	4.54
(K)LGEYGFQNALIVR(Y)	2	11.43	70.5	1700000000	43.3	740.57	1479.8	6
(K)EACFAVEGPK(L)	2	11.31	87.3	13100000	25.91	554.16	1107.51	4.53
(K)DAIPENLPPLTADFAEDK(D)	2	11.26	91.3	22100000	45.68	978.46	1955.96	3.77
(K)DAIPENLPPLTADFAEDK(D)	2	11	82.3	21900000	45.59	978.43	1955.96	3.77
(K)AEFVEVTK(L)	2	10.89	92.6	196000000	22.77	461.71	922.488	4.53
(K)GLVLIAFSQYLQQCPFDEHVK(L)	3	10.8	95.4	38400000	60.31	831.46	2492.26	5.32
(K)DAFLGSFLYEYSR(R)	2	10.72	85.4	13500000	55.44	784.34	1567.74	4.37
(R)MPCTEDYLSLILNR(L)	2	10.6	74.4	399000000	53.5	863.05	1724.84	4.37
(K)DLGEEHFK(G)	2	10.49	88.4	3940000	9.43	487.74	974.458	4.65
(K)DAFLGSFLYEYSR(R)	2	10.41	71.3	8250000	57.26	784.27	1567.74	4.37
(K)QTALVELLK(H)	2	10.1	87.5	202000000	41.7	507.87	1014.62	6
(K)CCTESLVNR(R)	2	10.02	73.2	7070000	19.06	569.73	1138.5	6
(R)RPCFSALTPDETYVPK(A)	2	9.98	72.8	157000000	36.75	940.87	1880.92	6.07
(R)mPCTEDYLSLILNR(L)	2	9.8	73.9	7590000	51.53	870.82	1724.84	4.37
(R)LCVLHEK(T)	2	9.7	66.4	2010000	19.39	450.05	898.481	6.75
(K)DAFLGSFLYEYSR(R)	2	9.63	65	10600000	56.2	784.35	1567.74	4.37
(R)LCVLHEK(T)	2	9.61	71.8	7570000	4.5	449.76	898.481	6.75
(K)EYEATLEECCAK(D)	2	9.48	66.9	9130000	25.45	751.77	1502.61	4.09
(K)YICDNQDTISSK(L)	2	9.37	78	78000000	21.5	722.68	1443.64	4.21
(K)YICDNQDTISSK(L)	2	9.29	84.3	90400000	20.71	722.37	1443.64	4.21
(K)DAFLGSFLYEYSR(R)	2	9.22	62.8	15500000	55.37	784.8	1567.74	4.37
(K)DAFLGSFLYEYSR(R)	2	8.93	72.1	10600000	56.51	784.61	1567.74	4.37
(K)DAIPENLPPLTADFAEDK(D)	2	8.57	84	21900000	46	979.45	1955.96	3.77
(K)EYEATLEECCAK(D)	2	8.44	71.3	9690000	25.26	752.35	1502.61	4.09
(K)DAFLGSFLYEYSR(R)	2	8.31	69.3	818000000	53.72	784.71	1567.74	4.37
(K)CCTESLVNR(R)	2	8.29	90.6	6080000	19.76	569.68	1138.5	6
(K)DLGEEHFK(G)	2	8.22	62	4920000	21.53	488.53	974.458	4.65
(K)DAIPENLPPLTADFAEDK(D)	3	7.93	77.8	9320000	45.71	652.69	1955.96	3.77
(R)LCVLHEK(T)	2	7.86	76.4	7180000	4.29	449.71	898.481	6.75
(K)EYEATLEECCAK(D)	2	7.02	79	17700000	23.85	751.72	1502.61	4.09
(K)GLVLIAFSQYLQQCPFDEHVK(L)	3	7.02	78.2	38100000	60.41	831.75	2492.26	5.32
(K)EYEATLEECCAK(D)	2	6.92	86.4	18300000	23.95	751.78	1502.61	4.09
(K)YNGVFQECCQAEDK(G)	2	6.68	67.8	36600000	28.36	874.76	1747.7	4.14
(K)DAFLGSFLYEYSR(R)	2	6.54	60.4	6980000	57.56	784.31	1567.74	4.37
(K)YICDNQDTISSK(L)	2	6.49	69.7	28000000	19.46	722.39	1443.64	4.21
(K)YICDNQDTISSK(L)	2	6.36	70.7	68300000	3.6	722.36	1443.64	4.21
(K)TVMENFVAFVDK(C)	2	6.12	84.7	641000000	51.46	700.27	1399.69	4.37

## Sheet: 1 site-TAMSP ATRP after-01
Accession	Protein name	Species	Protein MW(Da)	Coverage (%)	Spectra	Unique peptides	MS/MS Search (score)	Mean peptide Spectral Intensity
P02769	serum albumin	BOVIN	71289	61.2	88	36	476.74	144000000
Sequence	z	Score	SPI	Spectrum	RT	m/z	MH+	Peptide pI
			(%)	Intensity	(min)	Measured	Matched
						(Da)	(Da)
(K)DAFLGSFLYEYSR(R)	2	19.38	97.3	819000000	52.69	784.28	1567.74	4.37
(R)RHPEYAVSVLLR(L)	3	18.2	94.7	36200000	36.54	480.69	1439.81	8.75
(R)RHPYFYAPELLYYANK(Y)	3	16.82	91.3	24700000	46.55	682.55	2045.03	8.39
(R)FKDLGEEHFK(G)	3	16.47	91.4	12600000	25.35	417.28	1249.62	5.44
(K)LGEYGFQNALIVR(Y)	2	16.14	91.6	1720000000	43.21	740.37	1479.8	6
(K)LVVSTQTALA(-)	2	16.07	90.1	74100000	31.53	501.76	1002.58	5.52
(K)SLHTLFGDELCK(V)	2	15.88	88.5	127000000	39.5	710.35	1419.69	5.3
(K)ECCHGDLLECADDR(A)	3	15.6	92.5	14900000	27.03	583.95	1749.66	4.1
(R)MPCTEDYLSLILNR(L)	3	15.56	93.8	64500000	53.53	575.68	1724.84	4.37
(K)LGEYGFQNALIVR(Y)	3	15.52	83.9	36100000	43.42	494.55	1479.8	6
(K)CCAADDKEACFAVEGPK(L)	3	15.28	82.2	17800000	27.8	643.33	1927.8	4.32
(K)HLVDEPQNLIK(Q)	2	15.17	88.5	331000000	31.04	653.38	1305.72	5.32
(K)HLVDEPQNLIK(Q)	3	15.17	91.7	22200000	31.32	436.09	1305.72	5.32
(K)SLHTLFGDELCK(V)	3	15.14	82.8	42200000	39.62	474.05	1419.69	5.3
(R)HPYFYAPELLYYANK(Y)	3	14.88	87	49500000	48.83	630.34	1888.93	6.75
(R)MPCTEDYLSLILNR(L)	2	14.85	84.7	364000000	53.42	862.76	1724.84	4.37
(K)LVNELTEFAK(T)	2	14.61	92.6	723000000	37.61	582.24	1163.63	4.53
(R)RPCFSALTPDETYVPK(A)	3	14.35	88.7	300000000	36.72	627.85	1880.92	6.07
(K)KQTALVELLK(H)	2	14.16	90.5	38800000	37.57	571.79	1142.71	8.59
(R)KVPQVSTPTLVEVSR(S)	3	13.87	70	304000000	33.98	547.48	1639.94	8.75
(K)DAIPENLPPLTADFAEDKDVCK(N)	2	13.8	83.3	20900000	44.44	1229.98	2458.18	3.96
(K)CCTESLVNR(R)	2	13.59	86.1	5580000	3.83	569.67	1138.5	6
(K)GLVLIAFSQYLQQCPFDEHVK(L)	3	13.4	97.2	39100000	59.71	831.85	2492.26	5.32
(K)DLGEEHFK(G)	2	13.07	91.2	8510000	7.34	487.7	974.458	4.65
(R)KVPQVSTPTLVEVSR(S)	3	12.8	91	305000000	33.88	547.45	1639.94	8.75
(K)LFTFHADICTLPDTEK(Q)	2	12.78	81.5	103000000	43.05	954.39	1907.92	4.54
(K)GACLLPK(I)	2	12.65	84.1	4960000	21.79	379.66	758.423	8.75
(K)TVMENFVAFVDK(C)	3	12.65	82.4	5550000	50.77	467.35	1399.69	4.37
(K)YICDNQDTISSK(L)	2	12.61	79.6	80300000	20.18	722.33	1443.64	4.21
(K)GACLLPK(I)	2	12.6	82.4	4490000	24.44	379.74	758.423	8.75
(R)RHPEYAVSVLLR(L)	2	12.41	86.6	73500000	36.37	720.39	1439.81	8.75
(R)ETYGDMADCCEK(Q)	2	12.3	88.5	10600000	5	739.62	1478.52	3.91
(K)GLVLIAFSQYLQQCPFDEHVK(L)	4	12.02	81.1	7190000	59.9	623.91	2492.26	5.32
(K)TVMENFVAFVDK(C)	2	11.86	80.1	653000000	50.65	700.39	1399.69	4.37
(K)DDPHACYSTVFDK(L)	3	11.85	66.6	20900000	30.08	519.04	1554.65	4.41
(K)VPQVSTPTLVEVSR(S)	2	11.85	84.1	90700000	35.59	756.42	1511.84	5.97
(R)RHPYFYAPELLYYANK(Y)	2	11.82	71.1	19100000	46.76	1023.26	2045.03	8.39
(K)LFTFHADICTLPDTEK(Q)	3	11.67	77.3	299000000	42.96	636.86	1907.92	4.54
(K)LGEYGFQNALIVR(Y)	2	11.43	70.5	1700000000	43.3	740.57	1479.8	6
(K)DAIPENLPPLTADFAEDKDVCK(N)	4	11.36	94.2	18300000	44.37	615.49	2458.18	3.96
(K)EACFAVEGPK(L)	2	11.31	87.3	13100000	25.91	554.16	1107.51	4.53
(K)DAIPENLPPLTADFAEDK(D)	2	11.26	91.3	22100000	45.68	978.46	1955.96	3.77
(K)DAIPENLPPLTADFAEDK(D)	2	11	82.3	21900000	45.59	978.43	1955.96	3.77
(K)AEFVEVTK(L)	2	10.89	92.6	196000000	22.77	461.71	922.488	4.53
(K)GLVLIAFSQYLQQCPFDEHVK(L)	3	10.8	95.4	38400000	60.31	831.46	2492.26	5.32
(K)DAFLGSFLYEYSR(R)	2	10.72	85.4	13500000	55.44	784.34	1567.74	4.37
(R)MPCTEDYLSLILNR(L)	2	10.6	74.4	399000000	53.5	863.05	1724.84	4.37
(K)DLGEEHFK(G)	2	10.49	88.4	3940000	9.43	487.74	974.458	4.65
(K)DAFLGSFLYEYSR(R)	2	10.41	71.3	8250000	57.26	784.27	1567.74	4.37
(R)KVPQVSTPTLVEVSR(S)	2	10.34	79.7	610000000	33.69	820.45	1639.94	8.75
(R)FKDLGEEHFK(G)	3	10.1	79.2	11100000	25.13	417.57	1249.62	5.44
(K)QTALVELLK(H)	2	10.1	87.5	202000000	41.7	507.87	1014.62	6
(K)CCTESLVNR(R)	2	10.02	73.2	7070000	19.06	569.73	1138.5	6
(R)RPCFSALTPDETYVPK(A)	2	9.98	72.8	157000000	36.75	940.87	1880.92	6.07
(R)mPCTEDYLSLILNR(L)	2	9.8	73.9	7590000	51.53	870.82	1724.84	4.37
(R)LCVLHEK(T)	2	9.7	66.4	2010000	19.39	450.05	898.481	6.75
(K)DAFLGSFLYEYSR(R)	2	9.63	65	10600000	56.2	784.35	1567.74	4.37
(R)LCVLHEK(T)	2	9.61	71.8	7570000	4.5	449.76	898.481	6.75
(K)EYEATLEECCAK(D)	2	9.48	66.9	9130000	25.45	751.77	1502.61	4.09
(K)YICDNQDTISSK(L)	2	9.37	78	78000000	21.5	722.68	1443.64	4.21
(K)YICDNQDTISSK(L)	2	9.29	84.3	90400000	20.71	722.37	1443.64	4.21
(K)DAFLGSFLYEYSR(R)	2	9.22	62.8	15500000	55.37	784.8	1567.74	4.37
(K)DAFLGSFLYEYSR(R)	2	8.93	72.1	10600000	56.51	784.61	1567.74	4.37
(R)FKDLGEEHFK(G)	3	8.77	67.3	7400000	26.44	417.28	1249.62	5.44
(R)FKDLGEEHFK(G)	3	8.68	69.7	12400000	25.61	417.23	1249.62	5.44
(K)DAIPENLPPLTADFAEDK(D)	2	8.57	84	21900000	46	979.45	1955.96	3.77
(K)EYEATLEECCAK(D)	2	8.44	71.3	9690000	25.26	752.35	1502.61	4.09
(K)DAFLGSFLYEYSR(R)	2	8.31	69.3	818000000	53.72	784.71	1567.74	4.37
(K)CCTESLVNR(R)	2	8.29	90.6	6080000	19.76	569.68	1138.5	6
(K)DLGEEHFK(G)	2	8.22	62	4920000	21.53	488.53	974.458	4.65
(K)DAIPENLPPLTADFAEDK(D)	3	7.93	77.8	9320000	45.71	652.69	1955.96	3.77
(R)LCVLHEK(T)	2	7.86	76.4	7180000	4.29	449.71	898.481	6.75
(K)DLGEEHFK(G)	2	7.86	69	1250000	10.38	487.68	974.458	4.65
(R)FKDLGEEHFK(G)	2	7.54	64	10200000	26.34	625.27	1249.62	5.44
(K)YLYEIAR(R)	2	7.18	95.4	219000000	30.76	464.25	927.493	6
(K)LVTDLTK(V)	2	7.15	93.9	20600000	11.62	395.19	789.472	5.84
(K)LVTDLTK(V)	2	7.06	88.8	4610000	11.86	395.26	789.472	5.84
(K)EYEATLEECCAK(D)	2	7.02	79	17700000	23.85	751.72	1502.61	4.09
(K)GLVLIAFSQYLQQCPFDEHVK(L)	3	7.02	78.2	38100000	60.41	831.75	2492.26	5.32
(K)EYEATLEECCAK(D)	2	6.92	86.4	18300000	23.95	751.78	1502.61	4.09
(K)LVTDLTK(V)	2	6.87	94.9	24500000	15.36	395.24	789.472	5.84
(K)LVTDLTK(V)	2	6.87	95.1	31500000	19.02	395.17	789.472	5.84
(K)YNGVFQECCQAEDK(G)	2	6.68	67.8	36600000	28.36	874.76	1747.7	4.14
(K)AEFVEVTK(L)	2	6.55	86.5	88600000	24.84	461.79	922.488	4.53
(K)DAFLGSFLYEYSR(R)	2	6.54	60.4	6980000	57.56	784.31	1567.74	4.37
(K)YICDNQDTISSK(L)	2	6.49	69.7	28000000	19.46	722.39	1443.64	4.21
(K)YICDNQDTISSK(L)	2	6.36	70.7	68300000	3.6	722.36	1443.64	4.21
(K)TVMENFVAFVDK(C)	2	6.12	84.7	641000000	51.46	700.27	1399.69	4.37

## Sheet: 2 site--TAMSP ATRP after-01
Accession	Protein name	Species	Protein MW(Da)	Coverage (%)	Spectra	Unique peptides	MS/MS Search (score)	Mean peptide Spectral Intensity
P02769	serum albumin	BOVIN	71289	66.2	90	38	501.35	143000000
Sequence	z	Score	SPI	Spectrum	RT	m/z	MH+	Peptide pI
			(%)	Intensity	(min)	Measured	Matched
						(Da)	(Da)
(K)DAFLGSFLYEYSR(R)	2	19.38	97.3	819000000	52.69	784.28	1567.74	4.37
(R)RHPEYAVSVLLR(L)	3	18.2	94.7	36200000	36.54	480.69	1439.81	8.75
(R)RHPYFYAPELLYYANK(Y)	3	16.82	91.3	24700000	46.55	682.55	2045.03	8.39
(R)FKDLGEEHFK(G)	3	16.47	91.4	12600000	25.35	417.28	1249.62	5.44
(K)LGEYGFQNALIVR(Y)	2	16.14	91.6	1720000000	43.21	740.37	1479.8	6
(K)LVVSTQTALA(-)	2	16.07	90.1	74100000	31.53	501.76	1002.58	5.52
(K)SLHTLFGDELCK(V)	2	15.88	88.5	127000000	39.5	710.35	1419.69	5.3
(K)ECCHGDLLECADDR(A)	3	15.6	92.5	14900000	27.03	583.95	1749.66	4.1
(R)MPCTEDYLSLILNR(L)	3	15.56	93.8	64500000	53.53	575.68	1724.84	4.37
(K)LGEYGFQNALIVR(Y)	3	15.52	83.9	36100000	43.42	494.55	1479.8	6
(K)CCAADDKEACFAVEGPK(L)	3	15.28	82.2	17800000	27.8	643.33	1927.8	4.32
(K)HLVDEPQNLIK(Q)	2	15.17	88.5	331000000	31.04	653.38	1305.72	5.32
(K)HLVDEPQNLIK(Q)	3	15.17	91.7	22200000	31.32	436.09	1305.72	5.32
(K)SLHTLFGDELCK(V)	3	15.14	82.8	42200000	39.62	474.05	1419.69	5.3
(R)HPYFYAPELLYYANK(Y)	3	14.88	87	49500000	48.83	630.34	1888.93	6.75
(R)MPCTEDYLSLILNR(L)	2	14.85	84.7	364000000	53.42	862.76	1724.84	4.37
(K)LVNELTEFAK(T)	2	14.61	92.6	723000000	37.61	582.24	1163.63	4.53
(R)RPCFSALTPDETYVPK(A)	3	14.35	88.7	300000000	36.72	627.85	1880.92	6.07
(K)KQTALVELLK(H)	2	14.16	90.5	38800000	37.57	571.79	1142.71	8.59
(K)SHCIAEVEKDAIPENLPPLTADFAEDKDVCK(N)	4	13.93	83.5	91600000	44.66	879.21	3511.67	4.28
(R)KVPQVSTPTLVEVSR(S)	3	13.87	70	304000000	33.98	547.48	1639.94	8.75
(K)DAIPENLPPLTADFAEDKDVCK(N)	2	13.8	83.3	20900000	44.44	1229.98	2458.18	3.96
(K)CCTESLVNR(R)	2	13.59	86.1	5580000	3.83	569.67	1138.5	6
(K)GLVLIAFSQYLQQCPFDEHVK(L)	3	13.4	97.2	39100000	59.71	831.85	2492.26	5.32
(K)DLGEEHFK(G)	2	13.07	91.2	8510000	7.34	487.7	974.458	4.65
(R)KVPQVSTPTLVEVSR(S)	3	12.8	91	305000000	33.88	547.45	1639.94	8.75
(K)LFTFHADICTLPDTEK(Q)	2	12.78	81.5	103000000	43.05	954.39	1907.92	4.54
(K)GACLLPK(I)	2	12.65	84.1	4960000	21.79	379.66	758.423	8.75
(K)TVMENFVAFVDK(C)	3	12.65	82.4	5550000	50.77	467.35	1399.69	4.37
(K)YICDNQDTISSK(L)	2	12.61	79.6	80300000	20.18	722.33	1443.64	4.21
(K)GACLLPK(I)	2	12.6	82.4	4490000	24.44	379.74	758.423	8.75
(R)RHPEYAVSVLLR(L)	2	12.41	86.6	73500000	36.37	720.39	1439.81	8.75
(R)ETYGDMADCCEK(Q)	2	12.3	88.5	10600000	5	739.62	1478.52	3.91
(K)GLVLIAFSQYLQQCPFDEHVK(L)	4	12.02	81.1	7190000	59.9	623.91	2492.26	5.32
(K)TVMENFVAFVDK(C)	2	11.86	80.1	653000000	50.65	700.39	1399.69	4.37
(K)DDPHACYSTVFDK(L)	3	11.85	66.6	20900000	30.08	519.04	1554.65	4.41
(K)VPQVSTPTLVEVSR(S)	2	11.85	84.1	90700000	35.59	756.42	1511.84	5.97
(R)RHPYFYAPELLYYANK(Y)	2	11.82	71.1	19100000	46.76	1023.26	2045.03	8.39
(K)LFTFHADICTLPDTEK(Q)	3	11.67	77.3	299000000	42.96	636.86	1907.92	4.54
(K)LGEYGFQNALIVR(Y)	2	11.43	70.5	1700000000	43.3	740.57	1479.8	6
(K)DAIPENLPPLTADFAEDKDVCK(N)	4	11.36	94.2	18300000	44.37	615.49	2458.18	3.96
(K)EACFAVEGPK(L)	2	11.31	87.3	13100000	25.91	554.16	1107.51	4.53
(K)DAIPENLPPLTADFAEDK(D)	2	11.26	91.3	22100000	45.68	978.46	1955.96	3.77
(K)DAIPENLPPLTADFAEDK(D)	2	11	82.3	21900000	45.59	978.43	1955.96	3.77
(K)AEFVEVTK(L)	2	10.89	92.6	196000000	22.77	461.71	922.488	4.53
(K)SHCIAEVEKDAIPENLPPLTADFAEDKDVCK(N)	4	10.81	79.5	80800000	44.75	879.09	3511.67	4.28
(K)GLVLIAFSQYLQQCPFDEHVK(L)	3	10.8	95.4	38400000	60.31	831.46	2492.26	5.32
(K)DAFLGSFLYEYSR(R)	2	10.72	85.4	13500000	55.44	784.34	1567.74	4.37
(K)QEPERNECFLSHKDDSPDLPK(L)	4	10.68	66.7	37100000	28.83	636.24	2541.17	4.58
(R)MPCTEDYLSLILNR(L)	2	10.6	74.4	399000000	53.5	863.05	1724.84	4.37
(K)DLGEEHFK(G)	2	10.49	88.4	3940000	9.43	487.74	974.458	4.65
(K)DAFLGSFLYEYSR(R)	2	10.41	71.3	8250000	57.26	784.27	1567.74	4.37
(R)KVPQVSTPTLVEVSR(S)	2	10.34	79.7	610000000	33.69	820.45	1639.94	8.75
(R)FKDLGEEHFK(G)	3	10.1	79.2	11100000	25.13	417.57	1249.62	5.44
(K)QTALVELLK(H)	2	10.1	87.5	202000000	41.7	507.87	1014.62	6
(K)CCTESLVNR(R)	2	10.02	73.2	7070000	19.06	569.73	1138.5	6
(R)RPCFSALTPDETYVPK(A)	2	9.98	72.8	157000000	36.75	940.87	1880.92	6.07
(R)mPCTEDYLSLILNR(L)	2	9.8	73.9	7590000	51.53	870.82	1724.84	4.37
(R)LCVLHEK(T)	2	9.7	66.4	2010000	19.39	450.05	898.481	6.75
(K)DAFLGSFLYEYSR(R)	2	9.63	65	10600000	56.2	784.35	1567.74	4.37
(R)LCVLHEK(T)	2	9.61	71.8	7570000	4.5	449.76	898.481	6.75
(K)EYEATLEECCAK(D)	2	9.48	66.9	9130000	25.45	751.77	1502.61	4.09
(K)YICDNQDTISSK(L)	2	9.37	78	78000000	21.5	722.68	1443.64	4.21
(K)YICDNQDTISSK(L)	2	9.29	84.3	90400000	20.71	722.37	1443.64	4.21
(K)DAFLGSFLYEYSR(R)	2	9.22	62.8	15500000	55.37	784.8	1567.74	4.37
(K)DAFLGSFLYEYSR(R)	2	8.93	72.1	10600000	56.51	784.61	1567.74	4.37
(R)FKDLGEEHFK(G)	3	8.77	67.3	7400000	26.44	417.28	1249.62	5.44
(R)FKDLGEEHFK(G)	3	8.68	69.7	12400000	25.61	417.23	1249.62	5.44
(K)DAIPENLPPLTADFAEDK(D)	2	8.57	84	21900000	46	979.45	1955.96	3.77
(K)EYEATLEECCAK(D)	2	8.44	71.3	9690000	25.26	752.35	1502.61	4.09
(K)DAFLGSFLYEYSR(R)	2	8.31	69.3	818000000	53.72	784.71	1567.74	4.37
(K)CCTESLVNR(R)	2	8.29	90.6	6080000	19.76	569.68	1138.5	6
(K)DLGEEHFK(G)	2	8.22	62	4920000	21.53	488.53	974.458	4.65
(K)DAIPENLPPLTADFAEDK(D)	3	7.93	77.8	9320000	45.71	652.69	1955.96	3.77
(R)LCVLHEK(T)	2	7.86	76.4	7180000	4.29	449.71	898.481	6.75
(K)DLGEEHFK(G)	2	7.86	69	1250000	10.38	487.68	974.458	4.65
(R)FKDLGEEHFK(G)	2	7.54	64	10200000	26.34	625.27	1249.62	5.44
(K)YLYEIAR(R)	2	7.18	95.4	219000000	30.76	464.25	927.493	6
(K)LVTDLTK(V)	2	7.15	93.9	20600000	11.62	395.19	789.472	5.84
(K)LVTDLTK(V)	2	7.06	88.8	4610000	11.86	395.26	789.472	5.84
(K)EYEATLEECCAK(D)	2	7.02	79	17700000	23.85	751.72	1502.61	4.09
(K)EYEATLEECCAK(D)	2	6.92	86.4	18300000	23.95	751.78	1502.61	4.09
(K)LVTDLTK(V)	2	6.87	94.9	24500000	15.36	395.24	789.472	5.84
(K)LVTDLTK(V)	2	6.87	95.1	31500000	19.02	395.17	789.472	5.84
(K)YNGVFQECCQAEDK(G)	2	6.68	67.8	36600000	28.36	874.76	1747.7	4.14
(K)AEFVEVTK(L)	2	6.55	86.5	88600000	24.84	461.79	922.488	4.53
(K)DAFLGSFLYEYSR(R)	2	6.54	60.4	6980000	57.56	784.31	1567.74	4.37
(K)YICDNQDTISSK(L)	2	6.49	69.7	28000000	19.46	722.39	1443.64	4.21
(K)YICDNQDTISSK(L)	2	6.36	70.7	68300000	3.6	722.36	1443.64	4.21
(K)TVMENFVAFVDK(C)	2	6.12	84.7	641000000	51.46	700.27	1399.69	4.37

## Sheet: 0 site-TAMSP ATRP after-02
Accession	Protein name	Species	Protein MW(Da)	Coverage (%)	Spectra	Unique peptides	MS/MS Search (score)	Mean peptide Spectral Intensity
P02769	serum albumin	BOVIN	71289	66	68	34	483.06	51500000
Sequence	z	Score	SPI	Spectrum	RT	m/z	MH+	Peptide pI
			(%)	Intensity	(min)	Measured	Matched
						(Da)	(Da)
(K)GLVLIAFSQYLQQCPFDEHVK(L)	4	23.28	97.8	1740000	38.7	624.08	2492.26	5.32
(K)GLVLIAFSQYLQQCPFDEHVK(L)	3	20.39	97.5	8420000	38.66	831.69	2492.26	5.32
(R)MPCTEDYLSLILNR(L)	3	19.41	98.3	35800000	35.49	575.9	1724.84	4.37
(K)DAFLGSFLYEYSR(R)	2	18.89	97.9	122000000	34.57	784.46	1567.74	4.37
(K)TVmENFVAFVDK(C)	2	18.14	89.6	6020000	25.45	708.37	1399.69	4.37
(K)ECCHGDLLECADDR(A)	3	17.84	96.6	104000000	10.85	584	1749.66	4.1
(R)HPYFYAPELLYYANK(Y)	3	17.73	88.3	13600000	29.8	630.48	1888.93	6.75
(K)LGEYGFQNALIVR(Y)	2	17.24	93.5	244000000	25.81	740.45	1479.8	6
(K)SLHTLFGDELCK(V)	2	17.16	92.5	43300000	20.48	710.42	1419.69	5.3
(K)TVMENFVAFVDK(C)	2	16.24	90.5	131000000	31.08	700.42	1399.69	4.37
(K)HLVDEPQNLIK(Q)	2	16.11	94.6	50500000	15.38	653.34	1305.72	5.32
(K)LKPDPNTLCDEFK(A)	3	16.07	92.3	64200000	19.33	526.38	1576.77	4.56
(K)TVMENFVAFVDK(C)	3	16.06	94.1	3200000	31.32	467.83	1399.69	4.37
(R)MPCTEDYLSLILNR(L)	2	15.92	90.6	140000000	35.36	862.9	1724.84	4.37
(K)LGEYGFQNALIVR(Y)	3	15.7	85.9	9150000	25.99	494.06	1479.8	6
(K)LVNELTEFAK(T)	2	15.64	94.1	183000000	20.77	582.4	1163.63	4.53
(K)YICDNQDTISSK(L)	2	15.56	93.6	194000000	4.35	722.43	1443.64	4.21
(R)RPCFSALTPDETYVPK(A)	3	15.56	90.6	122000000	21.46	627.78	1880.92	6.07
(K)HLVDEPQNLIK(Q)	3	15.42	91	20000000	15.52	435.98	1305.72	5.32
(K)ECCHGDLLECADDR(A)	2	15.39	89.9	91000000	11.06	875.35	1749.66	4.1
(K)TCVADESHAGCEK(S)	3	15.15	88	19800000	1.62	488.66	1463.59	4.65
(K)DAFLGSFLYEYSR(R)	2	14.85	85.3	3520000	36.74	784.32	1567.74	4.37
(K)TCVADESHAGCEK(S)	2	14.64	91.8	14300000	1.74	732.27	1463.59	4.65
(K)EYEATLEECCAK(D)	2	14.4	88.4	199000000	11.3	751.74	1502.61	4.09
(K)DAFLGSFLYEYSR(R)	3	14.37	87	7700000	34.6	523.43	1567.74	4.37
(K)YICDNQDTISSK(L)	2	14.34	89.7	7120000	6.95	722.78	1443.64	4.21
(K)LVVSTQTALA(-)	2	14.32	85.7	45400000	18.02	501.81	1002.58	5.52
(R)HPYFYAPELLYYANK(Y)	2	14.12	88.9	3930000	29.94	944.92	1888.93	6.75
(K)LFTFHADICTLPDTEK(Q)	3	14.03	83.5	99300000	25.61	636.91	1907.92	4.54
(K)ECCDKPLLEK(S)	3	13.91	84.4	36300000	3.01	431.32	1291.6	4.68
(K)YNGVFQECCQAEDK(G)	2	13.66	91.2	142000000	13.83	874.39	1747.7	4.14
(K)VPQVSTPTLVEVSR(S)	2	13.41	90.7	64400000	20.96	756.38	1511.84	5.97
(K)DAIPENLPPLTADFAEDK(D)	3	13.28	90.5	16400000	30.33	652.77	1955.96	3.77
(K)EYEATLEECCAK(D)	3	13.09	77.3	12100000	11.85	501.59	1502.61	4.09
(R)ETYGDMADCCEK(Q)	2	13.06	92	31200000	6.61	739.8	1478.52	3.91
(K)LFTFHADICTLPDTEK(Q)	2	12.91	84.9	32400000	25.84	954.92	1907.92	4.54
(K)EACFAVEGPK(L)	2	12.57	93.3	14700000	10.42	554.33	1107.51	4.53
(K)LKPDPNTLCDEFK(A)	2	12.44	97.7	65300000	19.45	789	1576.77	4.56
(R)LCVLHEK(T)	2	12.28	77.8	21500000	2.73	449.71	898.481	6.75
(K)DLGEEHFK(G)	2	12.12	93.3	24900000	3.53	487.74	974.458	4.65
(K)CCTESLVNR(R)	2	12.05	84.3	42400000	3.39	569.8	1138.5	6
(K)SLHTLFGDELCK(V)	3	11.9	79.8	51700000	20.58	474.15	1419.69	5.3
(K)DAIPENLPPLTADFAEDK(D)	2	11.84	92.1	29600000	30.59	978.48	1955.96	3.77
(K)GACLLPK(I)	2	11.74	86.5	21500000	4.06	379.77	758.423	8.75
(K)YICDNQDTISSK(L)	3	11.71	80	4330000	4.67	481.88	1443.64	4.21
(R)NECFLSHK(D)	2	11.31	81	14900000	2.92	517.83	1034.47	6.75
(R)CCTKPESER(M)	3	11.17	68.3	717000	1.65	389.59	1166.49	6.14
(K)EACFAVEGPK(L)	2	11.1	93.7	39100000	8.17	554.19	1107.51	4.53
(K)QTALVELLK(H)	2	11.05	88.7	86900000	22.01	507.89	1014.62	6
(K)EYEATLEECCAK(D)	3	10.99	80.7	6660000	13.15	501.48	1502.61	4.09
(R)HPEYAVSVLLR(L)	2	10.86	94.5	8710000	20.19	642.4	1283.71	6.75
(K)YNGVFQECCQAEDK(G)	3	10.84	70.8	22600000	13.87	583.39	1747.7	4.14
(R)RPCFSALTPDETYVPK(A)	2	10.54	85.7	42600000	21.55	941.01	1880.92	6.07
(K)AEFVEVTK(L)	2	8.78	87.2	83800000	5.12	461.77	922.488	4.53
(R)mPCTEDYLSLILNR(L)	3	8.7	82.3	2090000	34.31	581.35	1724.84	4.37
(K)ECCHGDLLECADDR(A)	3	8.38	96.1	18900000	12.94	583.96	1749.66	4.1
(K)YNGVFQECCQAEDK(G)	3	8.23	75.4	22300000	14.14	583.42	1747.7	4.14
(K)GLVLIAFSQYLQQCPFDEHVK(L)	3	8.18	93.2	8380000	39.3	831.62	2492.26	5.32
(K)LVNELTEFAK(T)	2	8.17	95.8	3620000	23.36	582.29	1163.63	4.53
(K)LFTFHADICTLPDTEK(Q)	2	7.74	95.4	32400000	25.93	954.9	1907.92	4.54
(K)YLYEIAR(R)	2	7.71	97.7	93700000	14.45	464.33	927.493	6
(K)ECCHGDLLECADDR(A)	3	7.6	79.1	17700000	13.01	583.93	1749.66	4.1
(K)DDPHACYSTVFDK(L)	2	7.57	74.8	88100000	16.35	777.98	1554.65	4.41
(R)MPCTEDYLSLILNR(L)	2	7.17	82.7	144000000	36.24	862.95	1724.84	4.37
(R)ETYGDMADCCEK(Q)	2	6.77	93.4	24800000	7.68	739.82	1478.52	3.91
(K)LFTFHADICTLPDTEK(Q)	3	6.27	70.9	70400000	26.75	636.96	1907.92	4.54
(K)YNGVFQECCQAEDK(G)	2	6.09	88.9	21900000	16.06	875.23	1747.7	4.14
(K)SLHTLFGDELCK(V)	3	6.06	61	52400000	21.37	474.23	1419.69	5.3

## Sheet: 1 site-TAMSP ATRP after-02
Accession	Protein name	Species	Protein MW(Da)	Coverage (%)	Spectra	Unique peptides	MS/MS Search (score)	Mean peptide Spectral Intensity
P02769	serum albumin	BOVIN	71289	68.8	77	41	589.81	47700000
Sequence	z	Score	SPI	Spectrum	RT	m/z	MH+	Peptide pI
			(%)	Intensity	(min)	Measured	Matched
						(Da)	(Da)
(K)GLVLIAFSQYLQQCPFDEHVK(L)	4	23.28	97.8	1740000	38.7	624.08	2492.26	5.32
(K)GLVLIAFSQYLQQCPFDEHVK(L)	3	20.39	97.5	8420000	38.66	831.69	2492.26	5.32
(R)MPCTEDYLSLILNR(L)	3	19.41	98.3	35800000	35.49	575.9	1724.84	4.37
(R)RHPYFYAPELLYYANK(Y)	3	18.93	95.8	3860000	27.3	682.53	2045.03	8.39
(K)DAFLGSFLYEYSR(R)	2	18.89	97.9	122000000	34.57	784.46	1567.74	4.37
(K)CCAADDKEACFAVEGPK(L)	3	18.25	95.6	45700000	14.17	643.35	1927.8	4.32
(K)TVmENFVAFVDK(C)	2	18.14	89.6	6020000	25.45	708.37	1399.69	4.37
(K)ECCHGDLLECADDR(A)	3	17.84	96.6	104000000	10.85	584	1749.66	4.1
(R)HPYFYAPELLYYANK(Y)	3	17.73	88.3	13600000	29.8	630.48	1888.93	6.75
(K)LGEYGFQNALIVR(Y)	2	17.24	93.5	244000000	25.81	740.45	1479.8	6
(K)SLHTLFGDELCK(V)	2	17.16	92.5	43300000	20.48	710.42	1419.69	5.3
(R)RHPEYAVSVLLR(L)	3	16.61	92.4	10900000	17.73	480.75	1439.81	8.75
(K)TVMENFVAFVDK(C)	2	16.24	90.5	131000000	31.08	700.42	1399.69	4.37
(R)KVPQVSTPTLVEVSR(S)	3	16.19	89.2	91600000	18.47	547.53	1639.94	8.75
(K)HLVDEPQNLIK(Q)	2	16.11	94.6	50500000	15.38	653.34	1305.72	5.32
(K)LKPDPNTLCDEFK(A)	3	16.07	92.3	64200000	19.33	526.38	1576.77	4.56
(K)TVMENFVAFVDK(C)	3	16.06	94.1	3200000	31.32	467.83	1399.69	4.37
(R)MPCTEDYLSLILNR(L)	2	15.92	90.6	140000000	35.36	862.9	1724.84	4.37
(K)LGEYGFQNALIVR(Y)	3	15.7	85.9	9150000	25.99	494.06	1479.8	6
(K)LVNELTEFAK(T)	2	15.64	94.1	183000000	20.77	582.4	1163.63	4.53
(K)YICDNQDTISSK(L)	2	15.56	93.6	194000000	4.35	722.43	1443.64	4.21
(R)RPCFSALTPDETYVPK(A)	3	15.56	90.6	122000000	21.46	627.78	1880.92	6.07
(K)DAIPENLPPLTADFAEDKDVCK(N)	4	15.56	93.5	11100000	28.95	615.55	2458.18	3.96
(K)HLVDEPQNLIK(Q)	3	15.42	91	20000000	15.52	435.98	1305.72	5.32
(K)ECCHGDLLECADDR(A)	2	15.39	89.9	91000000	11.06	875.35	1749.66	4.1
(K)TCVADESHAGCEK(S)	3	15.15	88	19800000	1.62	488.66	1463.59	4.65
(K)DAFLGSFLYEYSR(R)	2	14.85	85.3	3520000	36.74	784.32	1567.74	4.37
(K)TCVADESHAGCEK(S)	2	14.64	91.8	14300000	1.74	732.27	1463.59	4.65
(K)DAIPENLPPLTADFAEDKDVCK(N)	2	14.41	84.8	14100000	28.76	1230.57	2458.18	3.96
(K)EYEATLEECCAK(D)	2	14.4	88.4	199000000	11.3	751.74	1502.61	4.09
(K)DAFLGSFLYEYSR(R)	3	14.37	87	7700000	34.6	523.43	1567.74	4.37
(K)YICDNQDTISSK(L)	2	14.34	89.7	7120000	6.95	722.78	1443.64	4.21
(K)LVVSTQTALA(-)	2	14.32	85.7	45400000	18.02	501.81	1002.58	5.52
(R)HPYFYAPELLYYANK(Y)	2	14.12	88.9	3930000	29.94	944.92	1888.93	6.75
(K)LFTFHADICTLPDTEK(Q)	3	14.03	83.5	99300000	25.61	636.91	1907.92	4.54
(K)ECCDKPLLEK(S)	3	13.91	84.4	36300000	3.01	431.32	1291.6	4.68
(K)YNGVFQECCQAEDK(G)	2	13.66	91.2	142000000	13.83	874.39	1747.7	4.14
(K)KQTALVELLK(H)	2	13.57	88.7	7040000	17.54	571.9	1142.71	8.59
(K)VPQVSTPTLVEVSR(S)	2	13.41	90.7	64400000	20.96	756.38	1511.84	5.97
(K)DAIPENLPPLTADFAEDK(D)	3	13.28	90.5	16400000	30.33	652.77	1955.96	3.77
(K)EYEATLEECCAK(D)	3	13.09	77.3	12100000	11.85	501.59	1502.61	4.09
(R)ETYGDMADCCEK(Q)	2	13.06	92	31200000	6.61	739.8	1478.52	3.91
(K)LFTFHADICTLPDTEK(Q)	2	12.91	84.9	32400000	25.84	954.92	1907.92	4.54
(K)CCAADDKEACFAVEGPK(L)	2	12.59	85.7	22700000	14.26	964.36	1927.8	4.32
(K)EACFAVEGPK(L)	2	12.57	93.3	14700000	10.42	554.33	1107.51	4.53
(K)LKPDPNTLCDEFK(A)	2	12.44	97.7	65300000	19.45	789	1576.77	4.56
(R)LCVLHEK(T)	2	12.28	77.8	21500000	2.73	449.71	898.481	6.75
(K)DLGEEHFK(G)	2	12.12	93.3	24900000	3.53	487.74	974.458	4.65
(K)CCTESLVNR(R)	2	12.05	84.3	42400000	3.39	569.8	1138.5	6
(K)SLHTLFGDELCK(V)	3	11.9	79.8	51700000	20.58	474.15	1419.69	5.3
(K)DAIPENLPPLTADFAEDK(D)	2	11.84	92.1	29600000	30.59	978.48	1955.96	3.77
(K)GACLLPK(I)	2	11.74	86.5	21500000	4.06	379.77	758.423	8.75
(K)YICDNQDTISSK(L)	3	11.71	80	4330000	4.67	481.88	1443.64	4.21
(R)NECFLSHK(D)	2	11.31	81	14900000	2.92	517.83	1034.47	6.75
(R)CCTKPESER(M)	3	11.17	68.3	717000	1.65	389.59	1166.49	6.14
(K)EACFAVEGPK(L)	2	11.1	93.7	39100000	8.17	554.19	1107.51	4.53
(K)QTALVELLK(H)	2	11.05	88.7	86900000	22.01	507.89	1014.62	6
(K)EYEATLEECCAK(D)	3	10.99	80.7	6660000	13.15	501.48	1502.61	4.09
(R)HPEYAVSVLLR(L)	2	10.86	94.5	8710000	20.19	642.4	1283.71	6.75
(K)YNGVFQECCQAEDK(G)	3	10.84	70.8	22600000	13.87	583.39	1747.7	4.14
(R)KVPQVSTPTLVEVSR(S)	2	10.55	89.7	69400000	18.6	820.46	1639.94	8.75
(R)RPCFSALTPDETYVPK(A)	2	10.54	85.7	42600000	21.55	941.01	1880.92	6.07
(R)RHPYFYAPELLYYANK(Y)	4	9.66	91.8	2430000	27.49	512.3	2045.03	8.39
(K)AEFVEVTK(L)	2	8.78	87.2	83800000	5.12	461.77	922.488	4.53
(R)mPCTEDYLSLILNR(L)	3	8.7	82.3	2090000	34.31	581.35	1724.84	4.37
(K)ECCHGDLLECADDR(A)	3	8.38	96.1	18900000	12.94	583.96	1749.66	4.1
(K)YNGVFQECCQAEDK(G)	3	8.23	75.4	22300000	14.14	583.42	1747.7	4.14
(K)GLVLIAFSQYLQQCPFDEHVK(L)	3	8.18	93.2	8380000	39.3	831.62	2492.26	5.32
(K)LVNELTEFAK(T)	2	8.17	95.8	3620000	23.36	582.29	1163.63	4.53
(K)LFTFHADICTLPDTEK(Q)	2	7.74	95.4	32400000	25.93	954.9	1907.92	4.54
(K)YLYEIAR(R)	2	7.71	97.7	93700000	14.45	464.33	927.493	6
(K)LKECCDKPLLEK(S)	3	7.64	90.7	11700000	3.2	511.67	1532.78	6.18
(K)ECCHGDLLECADDR(A)	3	7.6	79.1	17700000	13.01	583.93	1749.66	4.1
(K)DDPHACYSTVFDK(L)	2	7.57	74.8	88100000	16.35	777.98	1554.65	4.41
(R)MPCTEDYLSLILNR(L)	2	7.17	82.7	144000000	36.24	862.95	1724.84	4.37
(R)ETYGDMADCCEK(Q)	2	6.77	93.4	24800000	7.68	739.82	1478.52	3.91
(K)YNGVFQECCQAEDK(G)	2	6.09	88.9	21900000	16.06	875.23	1747.7	4.14

## Sheet: 2 site-TAMSP ATRP after-02
Accession	Protein name	Species	Protein MW(Da)	Coverage (%)	Spectra	Unique peptides	MS/MS Search (score)	Mean peptide Spectral Intensity
P02769	serum albumin	BOVIN	71289	67.2	72	39	576.71	50100000
Sequence	z	Score	SPI	Spectrum	RT	m/z	MH+	Peptide pI
			(%)	Intensity	(min)	Measured	Matched
						(Da)	(Da)
(K)GLVLIAFSQYLQQCPFDEHVK(L)	4	23.28	97.8	1740000	38.7	624.08	2492.26	5.32
(K)GLVLIAFSQYLQQCPFDEHVK(L)	3	20.39	97.5	8420000	38.66	831.69	2492.26	5.32
(R)MPCTEDYLSLILNR(L)	3	19.41	98.3	35800000	35.49	575.9	1724.84	4.37
(R)RHPYFYAPELLYYANK(Y)	3	18.93	95.8	3860000	27.3	682.53	2045.03	8.39
(K)DAFLGSFLYEYSR(R)	2	18.89	97.9	122000000	34.57	784.46	1567.74	4.37
(K)CCAADDKEACFAVEGPK(L)	3	18.25	95.6	45700000	14.17	643.35	1927.8	4.32
(K)TVmENFVAFVDK(C)	2	18.14	89.6	6020000	25.45	708.37	1399.69	4.37
(K)ECCHGDLLECADDR(A)	3	17.84	96.6	104000000	10.85	584	1749.66	4.1
(R)HPYFYAPELLYYANK(Y)	3	17.73	88.3	13600000	29.8	630.48	1888.93	6.75
(K)LGEYGFQNALIVR(Y)	2	17.24	93.5	244000000	25.81	740.45	1479.8	6
(K)SLHTLFGDELCK(V)	2	17.16	92.5	43300000	20.48	710.42	1419.69	5.3
(K)SHCIAEVEKDAIPENLPPLTADFAEDKDVCK(N)	4	17.02	87.5	20200000	28.27	878.83	3511.67	4.28
(R)RHPEYAVSVLLR(L)	3	16.61	92.4	10900000	17.73	480.75	1439.81	8.75
(K)TVMENFVAFVDK(C)	2	16.24	90.5	131000000	31.08	700.42	1399.69	4.37
(R)KVPQVSTPTLVEVSR(S)	3	16.19	89.2	91600000	18.47	547.53	1639.94	8.75
(K)HLVDEPQNLIK(Q)	2	16.11	94.6	50500000	15.38	653.34	1305.72	5.32
(K)LKPDPNTLCDEFK(A)	3	16.07	92.3	64200000	19.33	526.38	1576.77	4.56
(K)TVMENFVAFVDK(C)	3	16.06	94.1	3200000	31.32	467.83	1399.69	4.37
(R)MPCTEDYLSLILNR(L)	2	15.92	90.6	140000000	35.36	862.9	1724.84	4.37
(K)LGEYGFQNALIVR(Y)	3	15.7	85.9	9150000	25.99	494.06	1479.8	6
(K)LVNELTEFAK(T)	2	15.64	94.1	183000000	20.77	582.4	1163.63	4.53
(K)YICDNQDTISSK(L)	2	15.56	93.6	194000000	4.35	722.43	1443.64	4.21
(R)RPCFSALTPDETYVPK(A)	3	15.56	90.6	122000000	21.46	627.78	1880.92	6.07
(K)DAIPENLPPLTADFAEDKDVCK(N)	4	15.56	93.5	11100000	28.95	615.55	2458.18	3.96
(K)HLVDEPQNLIK(Q)	3	15.42	91	20000000	15.52	435.98	1305.72	5.32
(K)ECCHGDLLECADDR(A)	2	15.39	89.9	91000000	11.06	875.35	1749.66	4.1
(K)TCVADESHAGCEK(S)	3	15.15	88	19800000	1.62	488.66	1463.59	4.65
(K)DAFLGSFLYEYSR(R)	2	14.85	85.3	3520000	36.74	784.32	1567.74	4.37
(K)TCVADESHAGCEK(S)	2	14.64	91.8	14300000	1.74	732.27	1463.59	4.65
(K)DAIPENLPPLTADFAEDKDVCK(N)	2	14.41	84.8	14100000	28.76	1230.57	2458.18	3.96
(K)EYEATLEECCAK(D)	2	14.4	88.4	199000000	11.3	751.74	1502.61	4.09
(K)DAFLGSFLYEYSR(R)	3	14.37	87	7700000	34.6	523.43	1567.74	4.37
(K)YICDNQDTISSK(L)	2	14.34	89.7	7120000	6.95	722.78	1443.64	4.21
(K)LVVSTQTALA(-)	2	14.32	85.7	45400000	18.02	501.81	1002.58	5.52
(R)HPYFYAPELLYYANK(Y)	2	14.12	88.9	3930000	29.94	944.92	1888.93	6.75
(K)LFTFHADICTLPDTEK(Q)	3	14.03	83.5	99300000	25.61	636.91	1907.92	4.54
(K)ECCDKPLLEK(S)	3	13.91	84.4	36300000	3.01	431.32	1291.6	4.68
(K)YNGVFQECCQAEDK(G)	2	13.66	91.2	142000000	13.83	874.39	1747.7	4.14
(K)KQTALVELLK(H)	2	13.57	88.7	7040000	17.54	571.9	1142.71	8.59
(K)VPQVSTPTLVEVSR(S)	2	13.41	90.7	64400000	20.96	756.38	1511.84	5.97
(K)DAIPENLPPLTADFAEDK(D)	3	13.28	90.5	16400000	30.33	652.77	1955.96	3.77
(K)EYEATLEECCAK(D)	3	13.09	77.3	12100000	11.85	501.59	1502.61	4.09
(R)ETYGDMADCCEK(Q)	2	13.06	92	31200000	6.61	739.8	1478.52	3.91
(K)LFTFHADICTLPDTEK(Q)	2	12.91	84.9	32400000	25.84	954.92	1907.92	4.54
(K)CCAADDKEACFAVEGPK(L)	2	12.59	85.7	22700000	14.26	964.36	1927.8	4.32
(K)EACFAVEGPK(L)	2	12.57	93.3	14700000	10.42	554.33	1107.51	4.53
(K)LKPDPNTLCDEFK(A)	2	12.44	97.7	65300000	19.45	789	1576.77	4.56
(R)LCVLHEK(T)	2	12.28	77.8	21500000	2.73	449.71	898.481	6.75
(K)DLGEEHFK(G)	2	12.12	93.3	24900000	3.53	487.74	974.458	4.65
(K)CCTESLVNR(R)	2	12.05	84.3	42400000	3.39	569.8	1138.5	6
(K)DAIPENLPPLTADFAEDK(D)	2	11.84	92.1	29600000	30.59	978.48	1955.96	3.77
(K)GACLLPK(I)	2	11.74	86.5	21500000	4.06	379.77	758.423	8.75
(K)YICDNQDTISSK(L)	3	11.71	80	4330000	4.67	481.88	1443.64	4.21
(K)EACFAVEGPK(L)	2	11.1	93.7	39100000	8.17	554.19	1107.51	4.53
(K)QTALVELLK(H)	2	11.05	88.7	86900000	22.01	507.89	1014.62	6
(K)EYEATLEECCAK(D)	3	10.99	80.7	6660000	13.15	501.48	1502.61	4.09
(R)HPEYAVSVLLR(L)	2	10.86	94.5	8710000	20.19	642.4	1283.71	6.75
(K)YNGVFQECCQAEDK(G)	3	10.84	70.8	22600000	13.87	583.39	1747.7	4.14
(R)KVPQVSTPTLVEVSR(S)	2	10.55	89.7	69400000	18.6	820.46	1639.94	8.75
(R)RPCFSALTPDETYVPK(A)	2	10.54	85.7	42600000	21.55	941.01	1880.92	6.07
(R)RHPYFYAPELLYYANK(Y)	4	9.66	91.8	2430000	27.49	512.3	2045.03	8.39
(K)AEFVEVTK(L)	2	8.78	87.2	83800000	5.12	461.77	922.488	4.53
(R)mPCTEDYLSLILNR(L)	3	8.7	82.3	2090000	34.31	581.35	1724.84	4.37
(K)YNGVFQECCQAEDK(G)	3	8.23	75.4	22300000	14.14	583.42	1747.7	4.14
(K)GLVLIAFSQYLQQCPFDEHVK(L)	3	8.18	93.2	8380000	39.3	831.62	2492.26	5.32
(K)LVNELTEFAK(T)	2	8.17	95.8	3620000	23.36	582.29	1163.63	4.53
(K)LFTFHADICTLPDTEK(Q)	2	7.74	95.4	32400000	25.93	954.9	1907.92	4.54
(K)YLYEIAR(R)	2	7.71	97.7	93700000	14.45	464.33	927.493	6
(K)DDPHACYSTVFDK(L)	2	7.57	74.8	88100000	16.35	777.98	1554.65	4.41
(R)MPCTEDYLSLILNR(L)	2	7.17	82.7	144000000	36.24	862.95	1724.84	4.37
(R)ETYGDMADCCEK(Q)	2	6.77	93.4	24800000	7.68	739.82	1478.52	3.91
(K)SLHTLFGDELCK(V)	3	6.06	61	52400000	21.37	474.23	1419.69	5.3

## Sheet: 0 site-TAMSP ATRP after-03
Accession	Protein name	Species	Protein MW(Da)	Coverage (%)	Spectra	Unique peptides	MS/MS Search (score)	Mean peptide Spectral Intensity
P02769	serum albumin	BOVIN	71289	59.3	62	29	428.51	59600000
Sequence	z	Score	SPI	Spectrum	RT	m/z	MH+	Peptide pI
			(%)	Intensity	(min)	Measured	Matched
						(Da)	(Da)
(K)GLVLIAFSQYLQQCPFDEHVK(L)	3	20.91	98	9480000	37.49	831.65	2492.26	5.32
(R)MPCTEDYLSLILNR(L)	3	19.45	98.9	37900000	34.78	575.71	1724.84	4.37
(K)DAFLGSFLYEYSR(R)	2	19.38	97.4	3310000	36.34	784.37	1567.74	4.37
(K)ECCHGDLLECADDR(A)	3	18.86	97.4	83900000	3.88	584.01	1749.66	4.1
(K)LGEYGFQNALIVR(Y)	2	18.84	96.7	291000000	25.29	740.48	1479.8	6
(K)DAFLGSFLYEYSR(R)	2	18.38	96.9	136000000	34.06	784.41	1567.74	4.37
(R)RPCFSALTPDETYVPK(A)	3	18.06	95.5	131000000	20.55	627.73	1880.92	6.07
(K)LVNELTEFAK(T)	2	17.18	96.3	187000000	19.04	582.4	1163.63	4.53
(K)YICDNQDTISSK(L)	2	16.85	95.5	108000000	2.78	722.33	1443.64	4.21
(K)GLVLIAFSQYLQQCPFDEHVK(L)	4	16.75	87.8	2180000	37.66	624.09	2492.26	5.32
(K)SLHTLFGDELCK(V)	2	16.66	92.5	43600000	18.88	710.32	1419.69	5.3
(K)LKPDPNTLCDEFK(A)	3	16.63	93.6	66000000	17.36	526.37	1576.77	4.56
(K)VPQVSTPTLVEVSR(S)	3	16.37	91.1	8840000	20.3	504.31	1511.84	5.97
(K)LGEYGFQNALIVR(Y)	3	16.21	87.6	14200000	25.47	494.04	1479.8	6
(K)EYEATLEECCAK(D)	2	16.06	90.1	163000000	4.04	751.87	1502.61	4.09
(K)HLVDEPQNLIK(Q)	3	16.04	93.7	19500000	5.98	436.07	1305.72	5.32
(K)TVmENFVAFVDK(C)	2	15.7	89.8	6140000	24.62	708.34	1399.69	4.37
(K)LFTFHADICTLPDTEK(Q)	3	15.67	85.7	110000000	25.13	636.61	1907.92	4.54
(K)DAFLGSFLYEYSR(R)	3	15.62	91.1	11300000	34.09	523.33	1567.74	4.37
(K)TVMENFVAFVDK(C)	3	15.55	93.5	5130000	30.82	467.37	1399.69	4.37
(R)HPYFYAPELLYYANK(Y)	3	15.41	92	14400000	29.45	630.54	1888.93	6.75
(K)TVMENFVAFVDK(C)	2	14.79	92.4	127000000	30.51	700.38	1399.69	4.37
(K)SLHTLFGDELCK(V)	3	14.7	82.4	60400000	18.94	474.11	1419.69	5.3
(K)YNGVFQECCQAEDK(G)	3	14.54	83.5	37100000	5.18	583.45	1747.7	4.14
(K)LKPDPNTLCDEFK(A)	2	14.46	98.4	59300000	17.55	788.9	1576.77	4.56
(K)LVVSTQTALA(-)	2	14.43	86.9	30700000	16.1	501.85	1002.58	5.52
(R)MPCTEDYLSLILNR(L)	2	14.4	90	158000000	34.75	862.97	1724.84	4.37
(K)SLHTLFGDELCK(V)	3	14.34	85.4	58800000	18.85	474.07	1419.69	5.3
(K)TCVADESHAGCEK(S)	3	14.07	85.2	9580000	1.62	488.64	1463.59	4.65
(K)HLVDEPQNLIK(Q)	2	14.03	91.9	42100000	5.85	653.39	1305.72	5.32
(K)LGEYGFQNALIVR(Y)	2	13.86	82.9	5200000	27.66	740.55	1479.8	6
(K)LFTFHADICTLPDTEK(Q)	2	13.77	96.6	32000000	25.31	954.91	1907.92	4.54
(K)VPQVSTPTLVEVSR(S)	2	13.68	91.1	59800000	19.82	756.43	1511.84	5.97
(K)LVVSTQTALA(-)	2	13.65	83.5	45400000	13.83	501.82	1002.58	5.52
(K)EACFAVEGPK(L)	2	13.55	92.7	36300000	3.77	554.32	1107.51	4.53
(K)DAIPENLPPLTADFAEDK(D)	3	13.27	89.9	18700000	29.97	652.74	1955.96	3.77
(K)YNGVFQECCQAEDK(G)	2	13.22	91.2	163000000	4.99	874.38	1747.7	4.14
(K)SLHTLFGDELCK(V)	3	12.39	78.1	57900000	19.73	473.96	1419.69	5.3
(R)RPCFSALTPDETYVPK(A)	2	12.21	84.6	41900000	20.67	940.87	1880.92	6.07
(K)DDPHACYSTVFDK(L)	2	12.14	76	66500000	7.91	777.79	1554.65	4.41
(K)ECCHGDLLECADDR(A)	2	11.94	83.7	208000000	3.85	875.32	1749.66	4.1
(K)GACLLPK(I)	2	11.87	89.2	20500000	3.01	379.83	758.423	8.75
(K)YNGVFQECCQAEDK(G)	3	11.68	83.7	25700000	5.28	583.55	1747.7	4.14
(K)AEFVEVTK(L)	2	11.61	91.6	82400000	3.16	461.78	922.488	4.53
(R)HPYFYAPELLYYANK(Y)	2	11.15	89.5	5530000	29.48	944.93	1888.93	6.75
(K)QTALVELLK(H)	2	10.48	86.8	91600000	20.45	507.84	1014.62	6
(K)DDPHACYSTVFDK(L)	3	10	64.2	24100000	10.1	518.96	1554.65	4.41
(K)TCVADESHAGCEK(S)	2	9.45	89.7	4270000	1.81	732.27	1463.59	4.65
(R)MPCTEDYLSLILNR(L)	2	9.42	81.6	158000000	35.23	863.16	1724.84	4.37
(K)YLYEIAR(R)	2	9.21	97.4	83100000	6.05	464.28	927.493	6
(K)YNGVFQECCQAEDK(G)	2	9.03	88.5	14000000	7.14	874.79	1747.7	4.14
(R)ETYGDMADCCEK(Q)	2	8.85	87.7	35300000	3.19	739.85	1478.52	3.91
(K)DAIPENLPPLTADFAEDK(D)	2	8.84	92.5	27300000	29.94	978.57	1955.96	3.77
(K)LFTFHADICTLPDTEK(Q)	2	8.71	78.7	33300000	25.78	955.1	1907.92	4.54
(K)ECCDKPLLEK(S)	3	8.27	84.1	28100000	2.68	431.39	1291.6	4.68
(R)HPEYAVSVLLR(L)	2	8.15	73.8	8510000	18.59	642.45	1283.71	6.75
(K)YLYEIAR(R)	2	8.12	73.6	45500000	7.45	464.28	927.493	6
(K)SLHTLFGDELCK(V)	3	8.02	77.7	60400000	19.32	474.18	1419.69	5.3
(K)DDPHACYSTVFDK(L)	3	7.94	61.1	76200000	8.01	519	1554.65	4.41
(K)LVNELTEFAK(T)	2	7.15	82.4	2230000	22.81	582.84	1163.63	4.53
(R)mPCTEDYLSLILNR(L)	2	6.72	81	3140000	33.9	870.9	1724.84	4.37
(K)LVNELTEFAK(T)	2	6.66	94.7	96600000	20.49	582.35	1163.63	4.53

## Sheet: 1 site-TAMSP ATRP after-03
Accession	Protein name	Species	Protein MW(Da)	Coverage (%)	Spectra	Unique peptides	MS/MS Search (score)	Mean peptide Spectral Intensity
P02769	serum albumin	BOVIN	71289	64.7	75	37	535.27	58900000
Sequence	z	Score	SPI	Spectrum	RT	m/z	MH+	Peptide pI
			(%)	Intensity	(min)	Measured	Matched
						(Da)	(Da)
(K)GLVLIAFSQYLQQCPFDEHVK(L)	3	20.91	98	9480000	37.49	831.65	2492.26	5.32
(R)MPCTEDYLSLILNR(L)	3	19.45	98.9	37900000	34.78	575.71	1724.84	4.37
(K)DAFLGSFLYEYSR(R)	2	19.38	97.4	3310000	36.34	784.37	1567.74	4.37
(R)RHPEYAVSVLLR(L)	3	19	95.2	8830000	12.92	480.77	1439.81	8.75
(K)ECCHGDLLECADDR(A)	3	18.86	97.4	83900000	3.88	584.01	1749.66	4.1
(K)LGEYGFQNALIVR(Y)	2	18.84	96.7	291000000	25.29	740.48	1479.8	6
(K)DAFLGSFLYEYSR(R)	2	18.38	96.9	136000000	34.06	784.41	1567.74	4.37
(K)CCAADDKEACFAVEGPK(L)	3	18.33	96.4	41700000	4.7	643.46	1927.8	4.32
(R)RPCFSALTPDETYVPK(A)	3	18.06	95.5	131000000	20.55	627.73	1880.92	6.07
(K)LVNELTEFAK(T)	2	17.18	96.3	187000000	19.04	582.4	1163.63	4.53
(K)YICDNQDTISSK(L)	2	16.85	95.5	108000000	2.78	722.33	1443.64	4.21
(K)GLVLIAFSQYLQQCPFDEHVK(L)	4	16.75	87.8	2180000	37.66	624.09	2492.26	5.32
(K)SLHTLFGDELCK(V)	2	16.66	92.5	43600000	18.88	710.32	1419.69	5.3
(K)LKPDPNTLCDEFK(A)	3	16.63	93.6	66000000	17.36	526.37	1576.77	4.56
(K)VPQVSTPTLVEVSR(S)	3	16.37	91.1	8840000	20.3	504.31	1511.84	5.97
(K)LGEYGFQNALIVR(Y)	3	16.21	87.6	14200000	25.47	494.04	1479.8	6
(K)EYEATLEECCAK(D)	2	16.06	90.1	163000000	4.04	751.87	1502.61	4.09
(K)HLVDEPQNLIK(Q)	3	16.04	93.7	19500000	5.98	436.07	1305.72	5.32
(K)TVmENFVAFVDK(C)	2	15.7	89.8	6140000	24.62	708.34	1399.69	4.37
(K)LFTFHADICTLPDTEK(Q)	3	15.67	85.7	110000000	25.13	636.61	1907.92	4.54
(K)DAFLGSFLYEYSR(R)	3	15.62	91.1	11300000	34.09	523.33	1567.74	4.37
(K)TVMENFVAFVDK(C)	3	15.55	93.5	5130000	30.82	467.37	1399.69	4.37
(R)HPYFYAPELLYYANK(Y)	3	15.41	92	14400000	29.45	630.54	1888.93	6.75
(K)CCAADDKEACFAVEGPK(L)	2	14.86	83.1	25200000	4.74	964.35	1927.8	4.32
(R)KVPQVSTPTLVEVSR(S)	3	14.8	82.6	101000000	16.13	547.48	1639.94	8.75
(K)TVMENFVAFVDK(C)	2	14.79	92.4	127000000	30.51	700.38	1399.69	4.37
(K)SLHTLFGDELCK(V)	3	14.7	82.4	60400000	18.94	474.11	1419.69	5.3
(K)YNGVFQECCQAEDK(G)	3	14.54	83.5	37100000	5.18	583.45	1747.7	4.14
(K)LKPDPNTLCDEFK(A)	2	14.46	98.4	59300000	17.55	788.9	1576.77	4.56
(K)LVVSTQTALA(-)	2	14.43	86.9	30700000	16.1	501.85	1002.58	5.52
(R)MPCTEDYLSLILNR(L)	2	14.4	90	158000000	34.75	862.97	1724.84	4.37
(K)SLHTLFGDELCK(V)	3	14.34	85.4	58800000	18.85	474.07	1419.69	5.3
(K)TCVADESHAGCEK(S)	3	14.07	85.2	9580000	1.62	488.64	1463.59	4.65
(K)HLVDEPQNLIK(Q)	2	14.03	91.9	42100000	5.85	653.39	1305.72	5.32
(K)LGEYGFQNALIVR(Y)	2	13.86	82.9	5200000	27.66	740.55	1479.8	6
(R)RHPYFYAPELLYYANK(Y)	3	13.82	97.7	3670000	27.06	682.57	2045.03	8.39
(K)LFTFHADICTLPDTEK(Q)	2	13.77	96.6	32000000	25.31	954.91	1907.92	4.54
(K)VPQVSTPTLVEVSR(S)	2	13.68	91.1	59800000	19.82	756.43	1511.84	5.97
(K)LVVSTQTALA(-)	2	13.65	83.5	45400000	13.83	501.82	1002.58	5.52
(R)KVPQVSTPTLVEVSR(S)	2	13.65	91.4	57500000	16.28	820.45	1639.94	8.75
(K)EACFAVEGPK(L)	2	13.55	92.7	36300000	3.77	554.32	1107.51	4.53
(K)DAIPENLPPLTADFAEDK(D)	3	13.27	89.9	18700000	29.97	652.74	1955.96	3.77
(K)YNGVFQECCQAEDK(G)	2	13.22	91.2	163000000	4.99	874.38	1747.7	4.14
(K)SLHTLFGDELCK(V)	3	12.39	78.1	57900000	19.73	473.96	1419.69	5.3
(R)RPCFSALTPDETYVPK(A)	2	12.21	84.6	41900000	20.67	940.87	1880.92	6.07
(K)DDPHACYSTVFDK(L)	2	12.14	76	66500000	7.91	777.79	1554.65	4.41
(K)ECCHGDLLECADDR(A)	2	11.94	83.7	208000000	3.85	875.32	1749.66	4.1
(K)GACLLPK(I)	2	11.87	89.2	20500000	3.01	379.83	758.423	8.75
(K)DAIPENLPPLTADFAEDKDVCK(N)	2	11.7	78.8	17600000	28.41	1230.18	2458.18	3.96
(K)YNGVFQECCQAEDK(G)	3	11.68	83.7	25700000	5.28	583.55	1747.7	4.14
(K)AEFVEVTK(L)	2	11.61	91.6	82400000	3.16	461.78	922.488	4.53
(R)HPYFYAPELLYYANK(Y)	2	11.15	89.5	5530000	29.48	944.93	1888.93	6.75
(K)KQTALVELLK(H)	2	11.13	78.2	4940000	12.11	571.8	1142.71	8.59
(K)DAIPENLPPLTADFAEDKDVCK(N)	3	10.94	98	436000000	27.26	820.24	2458.18	3.96
(K)SHCIAEVEKDAIPENLPPLTADFAEDK(D)	4	10.5	88.1	8010000	29.1	753.37	3009.45	4.19
(K)QTALVELLK(H)	2	10.48	86.8	91600000	20.45	507.84	1014.62	6
(K)DDPHACYSTVFDK(L)	3	10	64.2	24100000	10.1	518.96	1554.65	4.41
(K)TCVADESHAGCEK(S)	2	9.45	89.7	4270000	1.81	732.27	1463.59	4.65
(R)MPCTEDYLSLILNR(L)	2	9.42	81.6	158000000	35.23	863.16	1724.84	4.37
(K)YLYEIAR(R)	2	9.21	97.4	83100000	6.05	464.28	927.493	6
(K)DAIPENLPPLTADFAEDKDVCK(N)	4	9.13	88	14800000	28.32	615.68	2458.18	3.96
(K)YNGVFQECCQAEDK(G)	2	9.03	88.5	14000000	7.14	874.79	1747.7	4.14
(R)ETYGDMADCCEK(Q)	2	8.85	87.7	35300000	3.19	739.85	1478.52	3.91
(K)DAIPENLPPLTADFAEDK(D)	2	8.84	92.5	27300000	29.94	978.57	1955.96	3.77
(K)LFTFHADICTLPDTEK(Q)	2	8.71	78.7	33300000	25.78	955.1	1907.92	4.54
(K)ECCDKPLLEK(S)	3	8.27	84.1	28100000	2.68	431.39	1291.6	4.68
(R)HPEYAVSVLLR(L)	2	8.15	73.8	8510000	18.59	642.45	1283.71	6.75
(K)YLYEIAR(R)	2	8.12	73.6	45500000	7.45	464.28	927.493	6
(K)SLHTLFGDELCK(V)	3	8.02	77.7	60400000	19.32	474.18	1419.69	5.3
(K)DDPHACYSTVFDK(L)	3	7.94	61.1	76200000	8.01	519	1554.65	4.41
(R)RHPEYAVSVLLR(L)	2	7.54	84.4	3330000	13.64	720.4	1439.81	8.75
(R)CCTKPESER(M)	3	7.48	77.6	676000	1.57	389.71	1166.49	6.14
(K)LVNELTEFAK(T)	2	7.15	82.4	2230000	22.81	582.84	1163.63	4.53
(R)mPCTEDYLSLILNR(L)	2	6.72	81	3140000	33.9	870.9	1724.84	4.37
(K)LVNELTEFAK(T)	2	6.66	94.7	96600000	20.49	582.35	1163.63	4.53

## Sheet: 2 site-TAMSP ATRP after-03
Accession	Protein name	Species	Protein MW(Da)	Coverage (%)	Spectra	Unique peptides	MS/MS Search (score)	Mean peptide Spectral Intensity
P02769	serum albumin	BOVIN	71289	64.7	75	37	535.27	58900000
Sequence	z	Score	SPI	Spectrum	RT	m/z	MH+	Peptide pI
			(%)	Intensity	(min)	Measured	Matched
						(Da)	(Da)
(K)GLVLIAFSQYLQQCPFDEHVK(L)	3	20.91	98	9480000	37.49	831.65	2492.26	5.32
(R)MPCTEDYLSLILNR(L)	3	19.45	98.9	37900000	34.78	575.71	1724.84	4.37
(K)DAFLGSFLYEYSR(R)	2	19.38	97.4	3310000	36.34	784.37	1567.74	4.37
(R)RHPEYAVSVLLR(L)	3	19	95.2	8830000	12.92	480.77	1439.81	8.75
(K)ECCHGDLLECADDR(A)	3	18.86	97.4	83900000	3.88	584.01	1749.66	4.1
(K)LGEYGFQNALIVR(Y)	2	18.84	96.7	291000000	25.29	740.48	1479.8	6
(K)DAFLGSFLYEYSR(R)	2	18.38	96.9	136000000	34.06	784.41	1567.74	4.37
(K)CCAADDKEACFAVEGPK(L)	3	18.33	96.4	41700000	4.7	643.46	1927.8	4.32
(R)RPCFSALTPDETYVPK(A)	3	18.06	95.5	131000000	20.55	627.73	1880.92	6.07
(K)LVNELTEFAK(T)	2	17.18	96.3	187000000	19.04	582.4	1163.63	4.53
(K)YICDNQDTISSK(L)	2	16.85	95.5	108000000	2.78	722.33	1443.64	4.21
(K)GLVLIAFSQYLQQCPFDEHVK(L)	4	16.75	87.8	2180000	37.66	624.09	2492.26	5.32
(K)SLHTLFGDELCK(V)	2	16.66	92.5	43600000	18.88	710.32	1419.69	5.3
(K)LKPDPNTLCDEFK(A)	3	16.63	93.6	66000000	17.36	526.37	1576.77	4.56
(K)VPQVSTPTLVEVSR(S)	3	16.37	91.1	8840000	20.3	504.31	1511.84	5.97
(K)LGEYGFQNALIVR(Y)	3	16.21	87.6	14200000	25.47	494.04	1479.8	6
(K)EYEATLEECCAK(D)	2	16.06	90.1	163000000	4.04	751.87	1502.61	4.09
(K)HLVDEPQNLIK(Q)	3	16.04	93.7	19500000	5.98	436.07	1305.72	5.32
(K)TVmENFVAFVDK(C)	2	15.7	89.8	6140000	24.62	708.34	1399.69	4.37
(K)LFTFHADICTLPDTEK(Q)	3	15.67	85.7	110000000	25.13	636.61	1907.92	4.54
(K)DAFLGSFLYEYSR(R)	3	15.62	91.1	11300000	34.09	523.33	1567.74	4.37
(K)TVMENFVAFVDK(C)	3	15.55	93.5	5130000	30.82	467.37	1399.69	4.37
(R)HPYFYAPELLYYANK(Y)	3	15.41	92	14400000	29.45	630.54	1888.93	6.75
(K)CCAADDKEACFAVEGPK(L)	2	14.86	83.1	25200000	4.74	964.35	1927.8	4.32
(R)KVPQVSTPTLVEVSR(S)	3	14.8	82.6	101000000	16.13	547.48	1639.94	8.75
(K)TVMENFVAFVDK(C)	2	14.79	92.4	127000000	30.51	700.38	1399.69	4.37
(K)SLHTLFGDELCK(V)	3	14.7	82.4	60400000	18.94	474.11	1419.69	5.3
(K)YNGVFQECCQAEDK(G)	3	14.54	83.5	37100000	5.18	583.45	1747.7	4.14
(K)LKPDPNTLCDEFK(A)	2	14.46	98.4	59300000	17.55	788.9	1576.77	4.56
(K)LVVSTQTALA(-)	2	14.43	86.9	30700000	16.1	501.85	1002.58	5.52
(R)MPCTEDYLSLILNR(L)	2	14.4	90	158000000	34.75	862.97	1724.84	4.37
(K)SLHTLFGDELCK(V)	3	14.34	85.4	58800000	18.85	474.07	1419.69	5.3
(K)TCVADESHAGCEK(S)	3	14.07	85.2	9580000	1.62	488.64	1463.59	4.65
(K)HLVDEPQNLIK(Q)	2	14.03	91.9	42100000	5.85	653.39	1305.72	5.32
(K)LGEYGFQNALIVR(Y)	2	13.86	82.9	5200000	27.66	740.55	1479.8	6
(R)RHPYFYAPELLYYANK(Y)	3	13.82	97.7	3670000	27.06	682.57	2045.03	8.39
(K)LFTFHADICTLPDTEK(Q)	2	13.77	96.6	32000000	25.31	954.91	1907.92	4.54
(K)VPQVSTPTLVEVSR(S)	2	13.68	91.1	59800000	19.82	756.43	1511.84	5.97
(K)LVVSTQTALA(-)	2	13.65	83.5	45400000	13.83	501.82	1002.58	5.52
(R)KVPQVSTPTLVEVSR(S)	2	13.65	91.4	57500000	16.28	820.45	1639.94	8.75
(K)EACFAVEGPK(L)	2	13.55	92.7	36300000	3.77	554.32	1107.51	4.53
(K)DAIPENLPPLTADFAEDK(D)	3	13.27	89.9	18700000	29.97	652.74	1955.96	3.77
(K)YNGVFQECCQAEDK(G)	2	13.22	91.2	163000000	4.99	874.38	1747.7	4.14
(K)SLHTLFGDELCK(V)	3	12.39	78.1	57900000	19.73	473.96	1419.69	5.3
(R)RPCFSALTPDETYVPK(A)	2	12.21	84.6	41900000	20.67	940.87	1880.92	6.07
(K)DDPHACYSTVFDK(L)	2	12.14	76	66500000	7.91	777.79	1554.65	4.41
(K)ECCHGDLLECADDR(A)	2	11.94	83.7	208000000	3.85	875.32	1749.66	4.1
(K)GACLLPK(I)	2	11.87	89.2	20500000	3.01	379.83	758.423	8.75
(K)DAIPENLPPLTADFAEDKDVCK(N)	2	11.7	78.8	17600000	28.41	1230.18	2458.18	3.96
(K)YNGVFQECCQAEDK(G)	3	11.68	83.7	25700000	5.28	583.55	1747.7	4.14
(K)AEFVEVTK(L)	2	11.61	91.6	82400000	3.16	461.78	922.488	4.53
(R)HPYFYAPELLYYANK(Y)	2	11.15	89.5	5530000	29.48	944.93	1888.93	6.75
(K)KQTALVELLK(H)	2	11.13	78.2	4940000	12.11	571.8	1142.71	8.59
(K)DAIPENLPPLTADFAEDKDVCK(N)	3	10.94	98	436000000	27.26	820.24	2458.18	3.96
(K)SHCIAEVEKDAIPENLPPLTADFAEDK(D)	4	10.5	88.1	8010000	29.1	753.37	3009.45	4.19
(K)QTALVELLK(H)	2	10.48	86.8	91600000	20.45	507.84	1014.62	6
(K)DDPHACYSTVFDK(L)	3	10	64.2	24100000	10.1	518.96	1554.65	4.41
(K)TCVADESHAGCEK(S)	2	9.45	89.7	4270000	1.81	732.27	1463.59	4.65
(R)MPCTEDYLSLILNR(L)	2	9.42	81.6	158000000	35.23	863.16	1724.84	4.37
(K)YLYEIAR(R)	2	9.21	97.4	83100000	6.05	464.28	927.493	6
(K)DAIPENLPPLTADFAEDKDVCK(N)	4	9.13	88	14800000	28.32	615.68	2458.18	3.96
(K)YNGVFQECCQAEDK(G)	2	9.03	88.5	14000000	7.14	874.79	1747.7	4.14
(R)ETYGDMADCCEK(Q)	2	8.85	87.7	35300000	3.19	739.85	1478.52	3.91
(K)DAIPENLPPLTADFAEDK(D)	2	8.84	92.5	27300000	29.94	978.57	1955.96	3.77
(K)LFTFHADICTLPDTEK(Q)	2	8.71	78.7	33300000	25.78	955.1	1907.92	4.54
(K)ECCDKPLLEK(S)	3	8.27	84.1	28100000	2.68	431.39	1291.6	4.68
(R)HPEYAVSVLLR(L)	2	8.15	73.8	8510000	18.59	642.45	1283.71	6.75
(K)YLYEIAR(R)	2	8.12	73.6	45500000	7.45	464.28	927.493	6
(K)SLHTLFGDELCK(V)	3	8.02	77.7	60400000	19.32	474.18	1419.69	5.3
(K)DDPHACYSTVFDK(L)	3	7.94	61.1	76200000	8.01	519	1554.65	4.41
(R)RHPEYAVSVLLR(L)	2	7.54	84.4	3330000	13.64	720.4	1439.81	8.75
(R)CCTKPESER(M)	3	7.48	77.6	676000	1.57	389.71	1166.49	6.14
(K)LVNELTEFAK(T)	2	7.15	82.4	2230000	22.81	582.84	1163.63	4.53
(R)mPCTEDYLSLILNR(L)	2	6.72	81	3140000	33.9	870.9	1724.84	4.37
(K)LVNELTEFAK(T)	2	6.66	94.7	96600000	20.49	582.35	1163.63	4.53
