# Supplementary material for: Preparation of trypsin aptamer modified silica particles by surface initiated atom transfer radical polymerization for proteome identification
Source: Royal Society of Chemistry journal article supplement (doi:10.1039/c5ay02080h), 2016-01-01
Supplement: c5ay02080h5.xlsx [file c5ay02080h5.xlsx]

## Sheet: 0 site-TAMSP-Glu-01
Accession	Protein name	Species	Protein MW(Da)	Coverage (%)	Spectra	Unique peptides	MS/MS Search (score)	Mean peptide Spectral Intensity
P02769	serum albumin	BOVIN	71289	26	18	14	188.64	21900000
Sequence	z	Score	SPI	Spectrum	RT	m/z	MH+	Peptide pI
			(%)	Intensity	(min)	Measured	Matched
						(Da)	(Da)
(K)DAFLGSFLYEYSR(R)	2	19.42	98	64900000	52.86	784.45	1567.74	4.37
(R)RPCFSALTPDETYVPK(A)	3	18.39	97.3	20300000	37.13	627.78	1880.92	6.07
(K)LGEYGFQNALIVR(Y)	2	17.02	95.5	102000000	43.71	740.58	1479.8	6
(K)LVNELTEFAK(T)	2	15.65	94.3	22800000	38.25	582.35	1163.63	4.53
(K)LFTFHADICTLPDTEK(Q)	2	15.31	93.8	4360000	43.35	954.84	1907.92	4.54
(K)LFTFHADICTLPDTEK(Q)	3	15.28	86.6	11000000	43.32	636.86	1907.92	4.54
(K)SLHTLFGDELCK(V)	2	14.59	89.5	12100000	39.96	710.33	1419.69	5.3
(K)HLVDEPQNLIK(Q)	2	14.57	93.4	13400000	31.83	653.89	1305.72	5.32
(K)YICDNQDTISSK(L)	2	14.38	90.2	7480000	20.91	722.32	1443.64	4.21
(K)SLHTLFGDELCK(V)	3	13.4	86.1	9600000	40.12	474.13	1419.69	5.3
(K)YICDNQDTISSK(L)	2	13.28	87	9340000	3.74	722.34	1443.64	4.21
(K)LVVSTQTALA(-)	2	12.44	81.1	16200000	31.74	501.79	1002.58	5.52
(K)AEFVEVTK(L)	2	10.38	92.6	22800000	23.63	461.75	922.488	4.53
(K)YLYEIAR(R)	2	9.53	88.2	9090000	31.61	464.33	927.493	6
(R)MPCTEDYLSLILNR(L)	2	9.41	75.5	9180000	53.44	862.89	1724.84	4.37
(K)QTALVELLK(H)	2	9.28	93.4	50600000	42.04	507.88	1014.62	6
(K)LVTDLTK(V)	2	8.27	90.5	3040000	22.46	395.2	789.472	5.84
(K)LVTDLTK(V)	2	7.35	94.1	5470000	17.18	395.17	789.472	5.84

## Sheet: 1site-TAMSP-Glu-01
Accession	Protein name	Species	Protein MW(Da)	Coverage (%)	Spectra	Unique peptides	MS/MS Search (score)	Mean peptide Spectral Intensity
P02769	serum albumin	BOVIN	71289	40.1	44	27	367.37	29200000
Sequence	z	Score	SPI	Spectrum	RT	m/z	MH+	Peptide pI
			(%)	Intensity	(min)	Measured	Matched
						(Da)	(Da)
(K)QNCDQFEKLGEYGFQNALIVR(Y)	4	21.83	97.4	5640000	48.09	633.31	2529.22	4.68
(R)RHPEYAVSVLLR(L)	3	20.54	96.1	11600000	36.97	480.82	1439.81	8.75
(K)DAFLGSFLYEYSR(R)	2	19.42	98	64900000	52.86	784.45	1567.74	4.37
(R)RPCFSALTPDETYVPK(A)	3	18.39	97.3	20300000	37.13	627.78	1880.92	6.07
(K)LGEYGFQNALIVR(Y)	2	17.02	95.5	102000000	43.71	740.58	1479.8	6
(K)QNCDQFEKLGEYGFQNALIVR(Y)	3	16.11	90	62200000	47.96	843.89	2529.22	4.68
(R)KVPQVSTPTLVEVSR(S)	3	15.91	86.5	127000000	34.02	547.43	1639.94	8.75
(R)ALKAWSVAR(L)	2	15.89	95.9	9780000	27.75	501.3	1001.59	11
(K)LVNELTEFAK(T)	2	15.65	94.3	22800000	38.25	582.35	1163.63	4.53
(K)LFTFHADICTLPDTEK(Q)	2	15.31	93.8	4360000	43.35	954.84	1907.92	4.54
(K)LFTFHADICTLPDTEK(Q)	3	15.28	86.6	11000000	43.32	636.86	1907.92	4.54
(R)LSQKFPKAEFVEVTK(L)	3	15.1	77.1	10800000	33.63	584.39	1750.97	8.5
(K)SLHTLFGDELCK(V)	2	14.59	89.5	12100000	39.96	710.33	1419.69	5.3
(K)HLVDEPQNLIK(Q)	2	14.57	93.4	13400000	31.83	653.89	1305.72	5.32
(R)LSQKFPKAEFVEVTK(L)	2	14.44	82.9	18200000	33.73	876.05	1750.97	8.5
(K)YICDNQDTISSK(L)	2	14.38	90.2	7480000	20.91	722.32	1443.64	4.21
(K)KQTALVELLK(H)	2	14.29	93.2	14900000	38.12	571.96	1142.71	8.59
(R)YTRKVPQVSTPTLVEVSR(S)	4	13.83	85.3	3150000	33.45	516.05	2060.15	9.99
(R)RHPEYAVSVLLR(L)	2	13.78	90.1	34800000	36.87	720.39	1439.81	8.75
(K)SLHTLFGDELCK(V)	3	13.4	86.1	9600000	40.12	474.13	1419.69	5.3
(K)HLVDEPQNLIKQNCDQFEK(L)	3	13.29	68.9	8050000	35.33	785.82	2355.14	4.75
(K)YICDNQDTISSK(L)	2	13.28	87	9340000	3.74	722.34	1443.64	4.21
(R)DTHKSEIAHR(F)	3	12.48	73.4	1620000	2.07	398.69	1193.6	6.92
(K)CCTESLVNRRPCFSALTPDETYVPK(A)	4	12.48	85.5	7730000	39.86	751.26	3000.4	6.18
(K)LVVSTQTALA(-)	2	12.44	81.1	16200000	31.74	501.79	1002.58	5.52
(K)QTALVELLKHKPK(A)	2	12.39	75.7	7030000	35.02	752.9	1504.92	9.7
(R)YTRKVPQVSTPTLVEVSR(S)	3	12.06	77.9	2960000	33.42	687.55	2060.15	9.99
(K)AFDEKLFTFHADICTLPDTEKQIK(K)	4	11.6	76.6	13000000	46.08	717.86	2867.43	4.83
(R)YTRKVPQVSTPTLVEVSR(S)	3	11.43	82.8	2920000	33.53	687.57	2060.15	9.99
(K)AFDEKLFTFHADICTLPDTEK(Q)	4	11.38	76.3	10800000	46.86	625.47	2498.19	4.43
(K)SHCIAEVEKDAIPENLPPLTADFAEDKDVCK(N)	4	11.26	85.8	10500000	44.68	879.1	3511.67	4.28
(K)AFDEKLFTFHADICTLPDTEK(Q)	3	11.01	72.7	17700000	46.79	833.5	2498.19	4.43
(K)AEFVEVTKLVTDLTK(V)	2	10.75	72.5	60200000	52.67	847.01	1692.94	4.68
(K)AFDEKLFTFHADICTLPDTEK(Q)	3	10.46	73.3	17900000	46.89	833.7	2498.19	4.43
(K)AEFVEVTK(L)	2	10.38	92.6	22800000	23.63	461.75	922.488	4.53
(R)KVPQVSTPTLVEVSR(S)	2	10.11	90	291000000	33.95	820.58	1639.94	8.75
(R)FKDLGEEHFK(G)	3	9.88	70.9	1170000	26.62	417.47	1249.62	5.44
(R)FKDLGEEHFK(G)	3	9.75	73.9	1220000	26.72	417.59	1249.62	5.44
(K)YLYEIAR(R)	2	9.53	88.2	9090000	31.61	464.33	927.493	6
(R)MPCTEDYLSLILNR(L)	2	9.41	75.5	9180000	53.44	862.89	1724.84	4.37
(K)QNCDQFEKLGEYGFQNALIVR(Y)	3	9.38	77.8	63000000	48.06	844.1	2529.22	4.68
(K)QTALVELLK(H)	2	9.28	93.4	50600000	42.04	507.88	1014.62	6
(K)SHCIAEVEKDAIPENLPPLTADFAEDKDVCK(N)	4	9.19	89.1	10500000	44.78	878.95	3511.67	4.28
(K)AFDEKLFTFHADICTLPDTEKQIK(K)	4	9	74.3	12900000	46.21	717.93	2867.43	4.83
(K)AEFVEVTKLVTDLTK(V)	2	8.78	80.5	59500000	52.76	847.06	1692.94	4.68
(K)AEFVEVTKLVTDLTK(V)	3	8.47	97.9	20100000	53.08	565.38	1692.94	4.68
(K)LVTDLTK(V)	2	8.27	90.5	3040000	22.46	395.2	789.472	5.84
(K)AFDEKLFTFHADICTLPDTEKQIK(K)	3	7.95	60.1	4980000	46.11	957.11	2867.43	4.83
(K)LVTDLTK(V)	2	7.87	95.8	3900000	20.39	395.17	789.472	5.84
(R)RHPEYAVSVLLR(L)	2	7.84	69.4	35200000	37.65	720.29	1439.81	8.75
(K)LFTFHADICTLPDTEKQIK(K)	4	7.62	69.8	3230000	42.95	570.24	2277.16	5.38
(K)LVTDLTK(V)	2	7.35	94.1	5470000	17.18	395.17	789.472	5.84
(R)ALKAWSVAR(L)	2	6.31	91.1	9610000	28.37	501.32	1001.59	11
(K)LVTDLTK(V)	2	6.23	88	5400000	17.81	395.28	789.472	5.84

## Sheet: 2 site--TAMSP-Glu-01
Accession	Protein name	Species	Protein MW(Da)	Coverage (%)	Spectra	Unique peptides	MS/MS Search (score)	Mean peptide Spectral Intensity
P02769	serum albumin	BOVIN	71289	46.9	54	31	419.16	25500000
Sequence	z	Score	SPI	Spectrum	RT	m/z	MH+	Peptide pI
			(%)	Intensity	(min)	Measured	Matched
						(Da)	(Da)
(K)QNCDQFEKLGEYGFQNALIVR(Y)	4	21.83	97.4	5640000	48.09	633.31	2529.22	4.68
(R)RHPEYAVSVLLR(L)	3	20.54	96.1	11600000	36.97	480.82	1439.81	8.75
(K)DAFLGSFLYEYSR(R)	2	19.42	98	64900000	52.86	784.45	1567.74	4.37
(R)RPCFSALTPDETYVPK(A)	3	18.39	97.3	20300000	37.13	627.78	1880.92	6.07
(K)LGEYGFQNALIVR(Y)	2	17.02	95.5	102000000	43.71	740.58	1479.8	6
(K)QNCDQFEKLGEYGFQNALIVR(Y)	3	16.11	90	62200000	47.96	843.89	2529.22	4.68
(R)KVPQVSTPTLVEVSR(S)	3	15.91	86.5	127000000	34.02	547.43	1639.94	8.75
(R)ALKAWSVAR(L)	2	15.89	95.9	9780000	27.75	501.3	1001.59	11
(K)LVNELTEFAK(T)	2	15.65	94.3	22800000	38.25	582.35	1163.63	4.53
(K)LFTFHADICTLPDTEK(Q)	2	15.31	93.8	4360000	43.35	954.84	1907.92	4.54
(K)LFTFHADICTLPDTEK(Q)	3	15.28	86.6	11000000	43.32	636.86	1907.92	4.54
(R)LSQKFPKAEFVEVTK(L)	3	15.1	77.1	10800000	33.63	584.39	1750.97	8.5
(K)SLHTLFGDELCK(V)	2	14.59	89.5	12100000	39.96	710.33	1419.69	5.3
(K)HLVDEPQNLIK(Q)	2	14.57	93.4	13400000	31.83	653.89	1305.72	5.32
(R)LSQKFPKAEFVEVTK(L)	2	14.44	82.9	18200000	33.73	876.05	1750.97	8.5
(K)YICDNQDTISSK(L)	2	14.38	90.2	7480000	20.91	722.32	1443.64	4.21
(K)KQTALVELLK(H)	2	14.29	93.2	14900000	38.12	571.96	1142.71	8.59
(R)YTRKVPQVSTPTLVEVSR(S)	4	13.83	85.3	3150000	33.45	516.05	2060.15	9.99
(R)RHPEYAVSVLLR(L)	2	13.78	90.1	34800000	36.87	720.39	1439.81	8.75
(K)SLHTLFGDELCK(V)	3	13.4	86.1	9600000	40.12	474.13	1419.69	5.3
(K)HLVDEPQNLIKQNCDQFEK(L)	3	13.29	68.9	8050000	35.33	785.82	2355.14	4.75
(K)YICDNQDTISSK(L)	2	13.28	87	9340000	3.74	722.34	1443.64	4.21
(R)DTHKSEIAHR(F)	3	12.48	73.4	1620000	2.07	398.69	1193.6	6.92
(K)CCTESLVNRRPCFSALTPDETYVPK(A)	4	12.48	85.5	7730000	39.86	751.26	3000.4	6.18
(K)LVVSTQTALA(-)	2	12.44	81.1	16200000	31.74	501.79	1002.58	5.52
(K)QTALVELLKHKPK(A)	2	12.39	75.7	7030000	35.02	752.9	1504.92	9.7
(R)YTRKVPQVSTPTLVEVSR(S)	3	12.06	77.9	2960000	33.42	687.55	2060.15	9.99
(K)AFDEKLFTFHADICTLPDTEKQIK(K)	4	11.6	76.6	13000000	46.08	717.86	2867.43	4.83
(R)YTRKVPQVSTPTLVEVSR(S)	3	11.43	82.8	2920000	33.53	687.57	2060.15	9.99
(K)AFDEKLFTFHADICTLPDTEK(Q)	4	11.38	76.3	10800000	46.86	625.47	2498.19	4.43
(K)SHCIAEVEKDAIPENLPPLTADFAEDKDVCK(N)	4	11.26	85.8	10500000	44.68	879.1	3511.67	4.28
(K)AFDEKLFTFHADICTLPDTEK(Q)	3	11.01	72.7	17700000	46.79	833.5	2498.19	4.43
(K)AEFVEVTKLVTDLTK(V)	2	10.75	72.5	60200000	52.67	847.01	1692.94	4.68
(K)AFDEKLFTFHADICTLPDTEK(Q)	3	10.46	73.3	17900000	46.89	833.7	2498.19	4.43
(K)AEFVEVTK(L)	2	10.38	92.6	22800000	23.63	461.75	922.488	4.53
(R)KVPQVSTPTLVEVSR(S)	2	10.11	90	291000000	33.95	820.58	1639.94	8.75
(R)FKDLGEEHFK(G)	3	9.88	70.9	1170000	26.62	417.47	1249.62	5.44
(R)FKDLGEEHFK(G)	3	9.75	73.9	1220000	26.72	417.59	1249.62	5.44
(K)YLYEIAR(R)	2	9.53	88.2	9090000	31.61	464.33	927.493	6
(R)MPCTEDYLSLILNR(L)	2	9.41	75.5	9180000	53.44	862.89	1724.84	4.37
(K)QNCDQFEKLGEYGFQNALIVR(Y)	3	9.38	77.8	63000000	48.06	844.1	2529.22	4.68
(K)QTALVELLK(H)	2	9.28	93.4	50600000	42.04	507.88	1014.62	6
(K)SHCIAEVEKDAIPENLPPLTADFAEDKDVCK(N)	4	9.19	89.1	10500000	44.78	878.95	3511.67	4.28
(K)AFDEKLFTFHADICTLPDTEKQIK(K)	4	9	74.3	12900000	46.21	717.93	2867.43	4.83
(K)AEFVEVTKLVTDLTK(V)	2	8.78	80.5	59500000	52.76	847.06	1692.94	4.68
(K)AEFVEVTKLVTDLTK(V)	3	8.47	97.9	20100000	53.08	565.38	1692.94	4.68
(K)LVTDLTK(V)	2	8.27	90.5	3040000	22.46	395.2	789.472	5.84
(K)AFDEKLFTFHADICTLPDTEKQIK(K)	3	7.95	60.1	4980000	46.11	957.11	2867.43	4.83
(K)LVTDLTK(V)	2	7.87	95.8	3900000	20.39	395.17	789.472	5.84
(R)RHPEYAVSVLLR(L)	2	7.84	69.4	35200000	37.65	720.29	1439.81	8.75
(K)LFTFHADICTLPDTEKQIK(K)	4	7.62	69.8	3230000	42.95	570.24	2277.16	5.38
(K)LVTDLTK(V)	2	7.35	94.1	5470000	17.18	395.17	789.472	5.84
(R)ALKAWSVAR(L)	2	6.31	91.1	9610000	28.37	501.32	1001.59	11
(K)LVTDLTK(V)	2	6.23	88	5400000	17.81	395.28	789.472	5.84

## Sheet: 0 site-TAMSP-Glu-02
Accession	Protein name	Species	Protein MW(Da)	Coverage (%)	Spectra	Unique peptides	MS/MS Search (score)	Mean peptide Spectral Intensity
P02769	serum albumin	BOVIN	71289	41.3	32	19	228.78	65800000
Sequence	z	Score	SPI	Spectrum	RT	m/z	MH+	Peptide pI
			(%)	Intensity	(min)	Measured	Matched
						(Da)	(Da)
(R)MPCTEDYLSLILNR(L)	3	18.25	96	29200000	53.58	575.83	1724.84	4.37
(R)HPYFYAPELLYYANK(Y)	3	16.31	83.6	31000000	48.86	630.56	1888.93	6.75
(K)DAFLGSFLYEYSR(R)	2	16.01	91.6	127000000	52.97	784.72	1567.74	4.37
(K)GLVLIAFSQYLQQCPFDEHVK(L)	3	15.86	95.9	87400000	59.5	831.52	2492.26	5.32
(K)LFTFHADICTLPDTEK(Q)	3	15.22	85.6	185000000	43.1	636.59	1907.92	4.54
(K)LGEYGFQNALIVR(Y)	3	14.97	82.4	7120000	43.72	494.08	1479.8	6
(K)LGEYGFQNALIVR(Y)	2	14.77	86.6	335000000	43.59	740.67	1479.8	6
(R)MPCTEDYLSLILNR(L)	2	14.63	87.4	166000000	53.55	863.14	1724.84	4.37
(K)ECCHGDLLECADDR(A)	3	13.55	81.2	38200000	27.66	584.06	1749.66	4.1
(K)GLVLIAFSQYLQQCPFDEHVK(L)	4	13.51	86.5	16700000	59.6	624.13	2492.26	5.32
(R)mPCTEDYLSLILNR(L)	2	13.12	79	6400000	51.46	871.36	1724.84	4.37
(K)GLVLIAFSQYLQQCPFDEHVK(L)	2	12.93	75.5	5080000	59.74	1247.48	2492.26	5.32
(R)RPCFSALTPDETYVPK(A)	3	12.83	68.7	103000000	37.39	627.63	1880.92	6.07
(K)LVNELTEFAK(T)	2	12.58	91.6	136000000	38.07	582.39	1163.63	4.53
(K)SLHTLFGDELCK(V)	3	12.55	78.5	44900000	39.6	474.12	1419.69	5.3
(K)LKPDPNTLCDEFK(A)	3	11.73	80.5	16200000	34.02	526.33	1576.77	4.56
(K)LVVSTQTALA(-)	2	10.74	68.7	12300000	31.92	501.74	1002.58	5.52
(K)LFTFHADICTLPDTEK(Q)	2	10.34	71.6	66600000	43.2	954.47	1907.92	4.54
(K)TVMENFVAFVDK(C)	2	10.01	84.5	185000000	50.65	700.7	1399.69	4.37
(K)QTALVELLK(H)	2	8.73	91.3	25800000	41.95	507.81	1014.62	6
(K)DAIPENLPPLTADFAEDK(D)	2	8.61	84.1	2800000	45.78	978.36	1955.96	3.77
(K)LFTFHADICTLPDTEK(Q)	3	8.52	74.5	186000000	43.69	637.15	1907.92	4.54
(K)SHCIAEVEK(D)	2	8.24	61.5	3230000	11.71	536.78	1072.51	5.38
(K)LKPDPNTLCDEFK(A)	2	8.24	76.6	24700000	34.05	788.87	1576.77	4.56
(K)SLHTLFGDELCK(V)	2	8.18	78.9	78400000	39.57	710.4	1419.69	5.3
(K)LKPDPNTLCDEFK(A)	2	8.14	67.7	24500000	33.95	788.8	1576.77	4.56
(K)YNGVFQECCQAEDK(G)	2	7.79	66.7	79000000	28.17	874.56	1747.7	4.14
(K)VPQVSTPTLVEVSR(S)	2	7.64	74.2	15800000	35.72	756.43	1511.84	5.97
(K)DAFLGSFLYEYSR(R)	2	7.35	69.5	14500000	54.44	784.27	1567.74	4.37
(K)DDSPDLPK(L)	2	7.16	60.1	2080000	18.7	443.82	886.415	3.93
(R)HPYFYAPELLYYANK(Y)	2	6.25	80.6	45900000	48.96	945.34	1888.93	6.75
(K)DAFLGSFLYEYSR(R)	2	6.04	68	6650000	55.37	784.36	1567.74	4.37

## Sheet: 1 site-TAMSP-Glu-02
Accession	Protein name	Species	Protein MW(Da)	Coverage (%)	Spectra	Unique peptides	MS/MS Search (score)	Mean peptide Spectral Intensity
P02769	serum albumin	BOVIN	71289	47.9	41	25	295.4	60800000
Sequence	z	Score	SPI	Spectrum	RT	m/z	MH+	Peptide pI
			(%)	Intensity	(min)	Measured	Matched
						(Da)	(Da)
(R)MPCTEDYLSLILNR(L)	3	18.25	96	29200000	53.58	575.83	1724.84	4.37
(R)HPYFYAPELLYYANK(Y)	3	16.31	83.6	31000000	48.86	630.56	1888.93	6.75
(R)RHPYFYAPELLYYANK(Y)	4	16.2	93.7	12000000	46.35	512.26	2045.03	8.39
(K)DAFLGSFLYEYSR(R)	2	16.01	91.6	127000000	52.97	784.72	1567.74	4.37
(K)GLVLIAFSQYLQQCPFDEHVK(L)	3	15.86	95.9	87400000	59.5	831.52	2492.26	5.32
(R)RHPYFYAPELLYYANK(Y)	2	15.35	87.7	20000000	46.29	1023.37	2045.03	8.39
(K)LFTFHADICTLPDTEK(Q)	3	15.22	85.6	185000000	43.1	636.59	1907.92	4.54
(K)LGEYGFQNALIVR(Y)	3	14.97	82.4	7120000	43.72	494.08	1479.8	6
(R)RHPYFYAPELLYYANK(Y)	3	14.87	76.5	44100000	46.25	682.57	2045.03	8.39
(K)LGEYGFQNALIVR(Y)	2	14.77	86.6	335000000	43.59	740.67	1479.8	6
(R)MPCTEDYLSLILNR(L)	2	14.63	87.4	166000000	53.55	863.14	1724.84	4.37
(K)ECCHGDLLECADDR(A)	3	13.55	81.2	38200000	27.66	584.06	1749.66	4.1
(K)GLVLIAFSQYLQQCPFDEHVK(L)	4	13.51	86.5	16700000	59.6	624.13	2492.26	5.32
(R)mPCTEDYLSLILNR(L)	2	13.12	79	6400000	51.46	871.36	1724.84	4.37
(K)GLVLIAFSQYLQQCPFDEHVK(L)	2	12.93	75.5	5080000	59.74	1247.48	2492.26	5.32
(R)RPCFSALTPDETYVPK(A)	3	12.83	68.7	103000000	37.39	627.63	1880.92	6.07
(K)LVNELTEFAK(T)	2	12.58	91.6	136000000	38.07	582.39	1163.63	4.53
(K)SLHTLFGDELCK(V)	3	12.55	78.5	44900000	39.6	474.12	1419.69	5.3
(R)KVPQVSTPTLVEVSR(S)	3	12.05	76	72100000	34.12	547.43	1639.94	8.75
(K)LKPDPNTLCDEFK(A)	3	11.73	80.5	16200000	34.02	526.33	1576.77	4.56
(K)DAIPENLPPLTADFAEDKDVCK(N)	2	11.26	82.7	13200000	44.38	1229.96	2458.18	3.96
(K)LVVSTQTALA(-)	2	10.74	68.7	12300000	31.92	501.74	1002.58	5.52
(K)CCAADDKEACFAVEGPK(L)	2	10.58	66.6	13200000	28.2	964.38	1927.8	4.32
(K)LFTFHADICTLPDTEK(Q)	2	10.34	71.6	66600000	43.2	954.47	1907.92	4.54
(K)TVMENFVAFVDK(C)	2	10.01	84.5	185000000	50.65	700.7	1399.69	4.37
(R)RHPEYAVSVLLR(L)	2	9.28	80.9	46500000	36.51	720.36	1439.81	8.75
(K)QTALVELLK(H)	2	8.73	91.3	25800000	41.95	507.81	1014.62	6
(K)DAIPENLPPLTADFAEDK(D)	2	8.61	84.1	2800000	45.78	978.36	1955.96	3.77
(K)LFTFHADICTLPDTEK(Q)	3	8.52	74.5	186000000	43.69	637.15	1907.92	4.54
(K)SHCIAEVEK(D)	2	8.24	61.5	3230000	11.71	536.78	1072.51	5.38
(K)LKPDPNTLCDEFK(A)	2	8.24	76.6	24700000	34.05	788.87	1576.77	4.56
(K)SLHTLFGDELCK(V)	2	8.18	78.9	78400000	39.57	710.4	1419.69	5.3
(K)LKPDPNTLCDEFK(A)	2	8.14	67.7	24500000	33.95	788.8	1576.77	4.56
(K)DAIPENLPPLTADFAEDKDVCK(N)	3	7.94	97.2	162000000	44.17	820.43	2458.18	3.96
(K)YNGVFQECCQAEDK(G)	2	7.79	66.7	79000000	28.17	874.56	1747.7	4.14
(K)VPQVSTPTLVEVSR(S)	2	7.64	74.2	15800000	35.72	756.43	1511.84	5.97
(K)DAFLGSFLYEYSR(R)	2	7.35	69.5	14500000	54.44	784.27	1567.74	4.37
(K)ECCHGDLLECADDRADLAK(Y)	4	7.25	68.4	1870000	33.54	562.73	2247.94	4.23
(K)DDSPDLPK(L)	2	7.16	60.1	2080000	18.7	443.82	886.415	3.93
(R)HPYFYAPELLYYANK(Y)	2	6.25	80.6	45900000	48.96	945.34	1888.93	6.75
(K)DAFLGSFLYEYSR(R)	2	6.04	68	6650000	55.37	784.36	1567.74	4.37

## Sheet: 2 site-TAMSP-Glu-02
Accession	Protein name	Species	Protein MW(Da)	Coverage (%)	Spectra	Unique peptides	MS/MS Search (score)	Mean peptide Spectral Intensity
P02769	serum albumin	BOVIN	71289	47.9	41	25	301.37	60900000
Sequence	z	Score	SPI	Spectrum	RT	m/z	MH+	Peptide pI
			(%)	Intensity	(min)	Measured	Matched
						(Da)	(Da)
(R)MPCTEDYLSLILNR(L)	3	18.25	96	29200000	53.58	575.83	1724.84	4.37
(R)HPYFYAPELLYYANK(Y)	3	16.31	83.6	31000000	48.86	630.56	1888.93	6.75
(R)RHPYFYAPELLYYANK(Y)	4	16.2	93.7	12000000	46.35	512.26	2045.03	8.39
(K)DAFLGSFLYEYSR(R)	2	16.01	91.6	127000000	52.97	784.72	1567.74	4.37
(K)GLVLIAFSQYLQQCPFDEHVK(L)	3	15.86	95.9	87400000	59.5	831.52	2492.26	5.32
(R)RHPYFYAPELLYYANK(Y)	2	15.35	87.7	20000000	46.29	1023.37	2045.03	8.39
(K)LFTFHADICTLPDTEK(Q)	3	15.22	85.6	185000000	43.1	636.59	1907.92	4.54
(K)LGEYGFQNALIVR(Y)	3	14.97	82.4	7120000	43.72	494.08	1479.8	6
(R)RHPYFYAPELLYYANK(Y)	3	14.87	76.5	44100000	46.25	682.57	2045.03	8.39
(K)LGEYGFQNALIVR(Y)	2	14.77	86.6	335000000	43.59	740.67	1479.8	6
(R)MPCTEDYLSLILNR(L)	2	14.63	87.4	166000000	53.55	863.14	1724.84	4.37
(K)SHCIAEVEKDAIPENLPPLTADFAEDKDVCK(N)	3	14.58	85.9	7090000	44.7	1171.76	3511.67	4.28
(K)ECCHGDLLECADDR(A)	3	13.55	81.2	38200000	27.66	584.06	1749.66	4.1
(K)GLVLIAFSQYLQQCPFDEHVK(L)	4	13.51	86.5	16700000	59.6	624.13	2492.26	5.32
(R)mPCTEDYLSLILNR(L)	2	13.12	79	6400000	51.46	871.36	1724.84	4.37
(K)GLVLIAFSQYLQQCPFDEHVK(L)	2	12.93	75.5	5080000	59.74	1247.48	2492.26	5.32
(R)RPCFSALTPDETYVPK(A)	3	12.83	68.7	103000000	37.39	627.63	1880.92	6.07
(K)LVNELTEFAK(T)	2	12.58	91.6	136000000	38.07	582.39	1163.63	4.53
(K)SLHTLFGDELCK(V)	3	12.55	78.5	44900000	39.6	474.12	1419.69	5.3
(R)KVPQVSTPTLVEVSR(S)	3	12.05	76	72100000	34.12	547.43	1639.94	8.75
(K)LKPDPNTLCDEFK(A)	3	11.73	80.5	16200000	34.02	526.33	1576.77	4.56
(K)DAIPENLPPLTADFAEDKDVCK(N)	2	11.26	82.7	13200000	44.38	1229.96	2458.18	3.96
(K)LVVSTQTALA(-)	2	10.74	68.7	12300000	31.92	501.74	1002.58	5.52
(K)CCAADDKEACFAVEGPK(L)	2	10.58	66.6	13200000	28.2	964.38	1927.8	4.32
(K)LFTFHADICTLPDTEK(Q)	2	10.34	71.6	66600000	43.2	954.47	1907.92	4.54
(K)TVMENFVAFVDK(C)	2	10.01	84.5	185000000	50.65	700.7	1399.69	4.37
(R)RHPEYAVSVLLR(L)	2	9.28	80.9	46500000	36.51	720.36	1439.81	8.75
(K)QTALVELLK(H)	2	8.73	91.3	25800000	41.95	507.81	1014.62	6
(K)LFTFHADICTLPDTEK(Q)	3	8.52	74.5	186000000	43.69	637.15	1907.92	4.54
(K)SHCIAEVEK(D)	2	8.24	61.5	3230000	11.71	536.78	1072.51	5.38
(K)LKPDPNTLCDEFK(A)	2	8.24	76.6	24700000	34.05	788.87	1576.77	4.56
(K)SLHTLFGDELCK(V)	2	8.18	78.9	78400000	39.57	710.4	1419.69	5.3
(K)LKPDPNTLCDEFK(A)	2	8.14	67.7	24500000	33.95	788.8	1576.77	4.56
(K)DAIPENLPPLTADFAEDKDVCK(N)	3	7.94	97.2	162000000	44.17	820.43	2458.18	3.96
(K)YNGVFQECCQAEDK(G)	2	7.79	66.7	79000000	28.17	874.56	1747.7	4.14
(K)VPQVSTPTLVEVSR(S)	2	7.64	74.2	15800000	35.72	756.43	1511.84	5.97
(K)DAFLGSFLYEYSR(R)	2	7.35	69.5	14500000	54.44	784.27	1567.74	4.37
(K)ECCHGDLLECADDRADLAK(Y)	4	7.25	68.4	1870000	33.54	562.73	2247.94	4.23
(K)DDSPDLPK(L)	2	7.16	60.1	2080000	18.7	443.82	886.415	3.93
(R)HPYFYAPELLYYANK(Y)	2	6.25	80.6	45900000	48.96	945.34	1888.93	6.75
(K)DAFLGSFLYEYSR(R)	2	6.04	68	6650000	55.37	784.36	1567.74	4.37

## Sheet: 0 site-TAMSP-Glu-03
Accession	Protein name	Species	Protein MW(Da)	Coverage (%)	Spectra	Unique peptides	MS/MS Search (score)	Mean peptide Spectral Intensity
P02769	serum albumin	BOVIN	71289	34.2	39	19	240.46	61000000
Sequence	z	Score	SPI	Spectrum	RT	m/z	MH+	Peptide pI
			(%)	Intensity	(min)	Measured	Matched
						(Da)	(Da)
(K)DAFLGSFLYEYSR(R)	2	19.38	97.7	198000000	53	784.34	1567.74	4.37
(K)DAFLGSFLYEYSR(R)	3	19.23	94.7	4690000	53.14	523.32	1567.74	4.37
(R)MPCTEDYLSLILNR(L)	3	17.58	94.1	10900000	53.74	575.69	1724.84	4.37
(R)mPCTEDYLSLILNR(L)	3	17.42	95.4	2810000	51.64	581.27	1724.84	4.37
(R)RPCFSALTPDETYVPK(A)	3	17.26	95.5	154000000	37.06	627.73	1880.92	6.07
(K)LGEYGFQNALIVR(Y)	3	16.9	89.2	12700000	43.86	493.95	1479.8	6
(K)VPQVSTPTLVEVSR(S)	3	15.93	89.3	9330000	35.96	504.75	1511.84	5.97
(K)LGEYGFQNALIVR(Y)	2	15.46	80.5	431000000	43.76	740.55	1479.8	6
(K)SLHTLFGDELCK(V)	3	15.01	89.8	16300000	40.08	473.99	1419.69	5.3
(K)SLHTLFGDELCK(V)	2	14.95	88.5	22300000	39.95	710.29	1419.69	5.3
(K)HLVDEPQNLIK(Q)	2	14.82	85.9	81500000	31.61	653.35	1305.72	5.32
(K)YICDNQDTISSK(L)	2	14.37	91.9	41600000	21.09	722.36	1443.64	4.21
(K)TVMENFVAFVDK(C)	2	13.39	88	34700000	51.01	700.24	1399.69	4.37
(K)LVNELTEFAK(T)	2	13.05	89.7	200000000	38.15	582.43	1163.63	4.53
(K)YICDNQDTISSK(L)	2	12.64	85.7	35300000	18.86	722.24	1443.64	4.21
(K)LFTFHADICTLPDTEK(Q)	3	12	75.3	29800000	43.46	636.87	1907.92	4.54
(K)VPQVSTPTLVEVSR(S)	2	11.84	76.3	69200000	35.77	756.4	1511.84	5.97
(K)GACLLPK(I)	2	11.56	81.9	2640000	22.67	379.78	758.423	8.75
(R)mPCTEDYLSLILNR(L)	2	11.4	97.2	8010000	51.6	870.88	1724.84	4.37
(K)TVmENFVAFVDK(C)	2	11.15	65	6460000	42.58	708.25	1399.69	4.37
(R)MPCTEDYLSLILNR(L)	2	10.81	78.9	45400000	53.61	862.8	1724.84	4.37
(R)MPCTEDYLSLILNR(L)	2	10.55	71.1	48100000	53.71	863.03	1724.84	4.37
(K)CCTESLVNR(R)	2	10.45	78.9	2940000	19.43	569.67	1138.5	6
(R)mPCTEDYLSLILNR(L)	2	9.9	73	7690000	51.5	870.77	1724.84	4.37
(K)CCTESLVNR(R)	2	9.27	70.7	2590000	20.1	569.79	1138.5	6
(K)YLYEIAR(R)	2	9.07	89.6	36700000	31.47	464.3	927.493	6
(K)LFTFHADICTLPDTEK(Q)	2	8.8	69.5	5830000	43.59	954.79	1907.92	4.54
(K)AEFVEVTK(L)	2	8.76	85.3	96100000	23.77	461.69	922.488	4.53
(R)LCVLHEK(T)	2	8.67	68.4	1790000	5.1	449.72	898.481	6.75
(K)AEFVEVTK(L)	2	8.61	91	96100000	23.2	461.64	922.488	4.53
(K)YICDNQDTISSK(L)	2	8.47	71.6	9640000	19.65	722.24	1443.64	4.21
(R)HPEYAVSVLLR(L)	2	8.2	88.8	6360000	39.75	642.28	1283.71	6.75
(K)LGEYGFQNALIVR(Y)	2	7.8	94.5	420000000	43.67	740.33	1479.8	6
(K)YICDNQDTISSK(L)	2	7.71	63.3	5020000	18.63	722.69	1443.64	4.21
(K)YICDNQDTISSK(L)	2	7.69	90.4	54200000	3.71	722.45	1443.64	4.21
(K)LFTFHADICTLPDTEK(Q)	3	7.68	65.2	29800000	43.57	636.86	1907.92	4.54
(K)QTALVELLK(H)	2	7.41	96.8	109000000	41.99	507.8	1014.62	6
(K)LVTDLTK(V)	2	6.65	93.6	22900000	21.23	395.22	789.472	5.84
(K)TVmENFVAFVDK(C)	2	6.09	80.1	6340000	42.68	708.26	1399.69	4.37

## Sheet: 1 site-TAMSP-Glu-03
Accession	Protein name	Species	Protein MW(Da)	Coverage (%)	Spectra	Unique peptides	MS/MS Search (score)	Mean peptide Spectral Intensity
P02769	serum albumin	BOVIN	71289	44.1	47	26	332.72	68900000
Sequence	z	Score	SPI	Spectrum	RT	m/z	MH+	Peptide pI
			(%)	Intensity	(min)	Measured	Matched
						(Da)	(Da)
(K)DAFLGSFLYEYSR(R)	2	19.38	97.7	198000000	53	784.34	1567.74	4.37
(K)DAFLGSFLYEYSR(R)	3	19.23	94.7	4690000	53.14	523.32	1567.74	4.37
(R)MPCTEDYLSLILNR(L)	3	17.58	94.1	10900000	53.74	575.69	1724.84	4.37
(R)mPCTEDYLSLILNR(L)	3	17.42	95.4	2810000	51.64	581.27	1724.84	4.37
(R)RPCFSALTPDETYVPK(A)	3	17.26	95.5	154000000	37.06	627.73	1880.92	6.07
(K)LGEYGFQNALIVR(Y)	3	16.9	89.2	12700000	43.86	493.95	1479.8	6
(K)CCAADDKEACFAVEGPK(L)	3	16.62	90.9	5000000	28.1	643.42	1927.8	4.32
(K)VPQVSTPTLVEVSR(S)	3	15.93	89.3	9330000	35.96	504.75	1511.84	5.97
(K)LGEYGFQNALIVR(Y)	2	15.46	80.5	431000000	43.76	740.55	1479.8	6
(K)SLHTLFGDELCK(V)	3	15.01	89.8	16300000	40.08	473.99	1419.69	5.3
(K)SLHTLFGDELCK(V)	2	14.95	88.5	22300000	39.95	710.29	1419.69	5.3
(K)HLVDEPQNLIK(Q)	2	14.82	85.9	81500000	31.61	653.35	1305.72	5.32
(K)KQTALVELLK(H)	2	14.59	89.7	20000000	38.18	571.83	1142.71	8.59
(R)DTHKSEIAHR(F)	2	14.48	84.4	1690000	2.15	597.21	1193.6	6.92
(R)KVPQVSTPTLVEVSR(S)	3	14.38	77.5	340000000	33.93	547.27	1639.94	8.75
(K)YICDNQDTISSK(L)	2	14.37	91.9	41600000	21.09	722.36	1443.64	4.21
(R)DTHKSEIAHR(F)	3	13.94	80.9	12200000	2.11	398.88	1193.6	6.92
(K)TVMENFVAFVDK(C)	2	13.39	88	34700000	51.01	700.24	1399.69	4.37
(K)LVNELTEFAK(T)	2	13.05	89.7	200000000	38.15	582.43	1163.63	4.53
(K)YICDNQDTISSK(L)	2	12.64	85.7	35300000	18.86	722.24	1443.64	4.21
(K)LFTFHADICTLPDTEK(Q)	3	12	75.3	29800000	43.46	636.87	1907.92	4.54
(K)VPQVSTPTLVEVSR(S)	2	11.84	76.3	69200000	35.77	756.4	1511.84	5.97
(R)KVPQVSTPTLVEVSR(S)	2	11.63	91.7	472000000	33.89	820.45	1639.94	8.75
(K)GACLLPK(I)	2	11.56	81.9	2640000	22.67	379.78	758.423	8.75
(R)mPCTEDYLSLILNR(L)	2	11.4	97.2	8010000	51.6	870.88	1724.84	4.37
(K)DAIPENLPPLTADFAEDKDVCK(N)	4	11.29	75.5	2220000	44.55	615.39	2458.18	3.96
(K)TVmENFVAFVDK(C)	2	11.15	65	6460000	42.58	708.25	1399.69	4.37
(R)MPCTEDYLSLILNR(L)	2	10.81	78.9	45400000	53.61	862.8	1724.84	4.37
(R)RHPEYAVSVLLR(L)	3	10.62	84.9	8010000	37.45	480.57	1439.81	8.75
(R)MPCTEDYLSLILNR(L)	2	10.55	71.1	48100000	53.71	863.03	1724.84	4.37
(K)CCTESLVNR(R)	2	10.45	78.9	2940000	19.43	569.67	1138.5	6
(K)QNCDQFEKLGEYGFQNALIVR(Y)	3	10.28	86	20600000	48.38	843.97	2529.22	4.68
(R)mPCTEDYLSLILNR(L)	2	9.9	73	7690000	51.5	870.77	1724.84	4.37
(K)CCTESLVNR(R)	2	9.27	70.7	2590000	20.1	569.79	1138.5	6
(K)YLYEIAR(R)	2	9.07	89.6	36700000	31.47	464.3	927.493	6
(K)LFTFHADICTLPDTEK(Q)	2	8.8	69.5	5830000	43.59	954.79	1907.92	4.54
(K)AEFVEVTK(L)	2	8.76	85.3	96100000	23.77	461.69	922.488	4.53
(R)LCVLHEK(T)	2	8.67	68.4	1790000	5.1	449.72	898.481	6.75
(K)AEFVEVTK(L)	2	8.61	91	96100000	23.2	461.64	922.488	4.53
(K)YICDNQDTISSK(L)	2	8.47	71.6	9640000	19.65	722.24	1443.64	4.21
(R)RHPEYAVSVLLR(L)	2	8.32	77.7	15700000	37.29	720.35	1439.81	8.75
(R)HPEYAVSVLLR(L)	2	8.2	88.8	6360000	39.75	642.28	1283.71	6.75
(K)LGEYGFQNALIVR(Y)	2	7.8	94.5	420000000	43.67	740.33	1479.8	6
(K)YICDNQDTISSK(L)	2	7.71	63.3	5020000	18.63	722.69	1443.64	4.21
(K)YICDNQDTISSK(L)	2	7.69	90.4	54200000	3.71	722.45	1443.64	4.21
(K)QTALVELLK(H)	2	7.41	96.8	109000000	41.99	507.8	1014.62	6
(K)LVTDLTK(V)	2	6.65	93.6	22900000	21.23	395.22	789.472	5.84

## Sheet: 2 site-TAMSP-Glu-03
Accession	Protein name	Species	Protein MW(Da)	Coverage (%)	Spectra	Unique peptides	MS/MS Search (score)	Mean peptide Spectral Intensity
P02769	serum albumin	BOVIN	71289	44.1	52	26	332.96	63700000
Sequence	z	Score	SPI	Spectrum	RT	m/z	MH+	Peptide pI
			(%)	Intensity	(min)	Measured	Matched
						(Da)	(Da)
(K)DAFLGSFLYEYSR(R)	2	19.38	97.7	198000000	53	784.34	1567.74	4.37
(K)DAFLGSFLYEYSR(R)	3	19.23	94.7	4690000	53.14	523.32	1567.74	4.37
(R)MPCTEDYLSLILNR(L)	3	17.58	94.1	10900000	53.74	575.69	1724.84	4.37
(R)mPCTEDYLSLILNR(L)	3	17.42	95.4	2810000	51.64	581.27	1724.84	4.37
(R)RPCFSALTPDETYVPK(A)	3	17.26	95.5	154000000	37.06	627.73	1880.92	6.07
(K)LGEYGFQNALIVR(Y)	3	16.9	89.2	12700000	43.86	493.95	1479.8	6
(K)CCAADDKEACFAVEGPK(L)	3	16.62	90.9	5000000	28.1	643.42	1927.8	4.32
(K)VPQVSTPTLVEVSR(S)	3	15.93	89.3	9330000	35.96	504.75	1511.84	5.97
(K)LGEYGFQNALIVR(Y)	2	15.46	80.5	431000000	43.76	740.55	1479.8	6
(K)SLHTLFGDELCK(V)	3	15.01	89.8	16300000	40.08	473.99	1419.69	5.3
(K)SLHTLFGDELCK(V)	2	14.95	88.5	22300000	39.95	710.29	1419.69	5.3
(K)HLVDEPQNLIK(Q)	2	14.82	85.9	81500000	31.61	653.35	1305.72	5.32
(K)KQTALVELLK(H)	2	14.59	89.7	20000000	38.18	571.83	1142.71	8.59
(R)DTHKSEIAHR(F)	2	14.48	84.4	1690000	2.15	597.21	1193.6	6.92
(R)KVPQVSTPTLVEVSR(S)	3	14.38	77.5	340000000	33.93	547.27	1639.94	8.75
(K)YICDNQDTISSK(L)	2	14.37	91.9	41600000	21.09	722.36	1443.64	4.21
(R)DTHKSEIAHR(F)	3	13.94	80.9	12200000	2.11	398.88	1193.6	6.92
(K)TVMENFVAFVDK(C)	2	13.39	88	34700000	51.01	700.24	1399.69	4.37
(K)LVNELTEFAK(T)	2	13.05	89.7	200000000	38.15	582.43	1163.63	4.53
(K)YICDNQDTISSK(L)	2	12.64	85.7	35300000	18.86	722.24	1443.64	4.21
(K)LFTFHADICTLPDTEK(Q)	3	12	75.3	29800000	43.46	636.87	1907.92	4.54
(K)VPQVSTPTLVEVSR(S)	2	11.84	76.3	69200000	35.77	756.4	1511.84	5.97
(R)KVPQVSTPTLVEVSR(S)	2	11.63	91.7	472000000	33.89	820.45	1639.94	8.75
(K)GACLLPK(I)	2	11.56	81.9	2640000	22.67	379.78	758.423	8.75
(R)mPCTEDYLSLILNR(L)	2	11.4	97.2	8010000	51.6	870.88	1724.84	4.37
(K)DAIPENLPPLTADFAEDKDVCK(N)	4	11.29	75.5	2220000	44.55	615.39	2458.18	3.96
(K)TVmENFVAFVDK(C)	2	11.15	65	6460000	42.58	708.25	1399.69	4.37
(R)MPCTEDYLSLILNR(L)	2	10.81	78.9	45400000	53.61	862.8	1724.84	4.37
(R)RHPEYAVSVLLR(L)	3	10.62	84.9	8010000	37.45	480.57	1439.81	8.75
(R)MPCTEDYLSLILNR(L)	2	10.55	71.1	48100000	53.71	863.03	1724.84	4.37
(K)CCTESLVNR(R)	2	10.45	78.9	2940000	19.43	569.67	1138.5	6
(K)QNCDQFEKLGEYGFQNALIVR(Y)	3	10.28	86	20600000	48.38	843.97	2529.22	4.68
(R)mPCTEDYLSLILNR(L)	2	9.9	73	7690000	51.5	870.77	1724.84	4.37
(K)QNCDQFEKLGEYGFQNALIVR(Y)	3	9.74	68.1	20900000	48.47	843.78	2529.22	4.68
(K)CCTESLVNR(R)	2	9.27	70.7	2590000	20.1	569.79	1138.5	6
(K)YLYEIAR(R)	2	9.07	89.6	36700000	31.47	464.3	927.493	6
(K)LFTFHADICTLPDTEK(Q)	2	8.8	69.5	5830000	43.59	954.79	1907.92	4.54
(K)AEFVEVTK(L)	2	8.76	85.3	96100000	23.77	461.69	922.488	4.53
(R)LCVLHEK(T)	2	8.67	68.4	1790000	5.1	449.72	898.481	6.75
(K)AEFVEVTK(L)	2	8.61	91	96100000	23.2	461.64	922.488	4.53
(K)YICDNQDTISSK(L)	2	8.47	71.6	9640000	19.65	722.24	1443.64	4.21
(R)RHPEYAVSVLLR(L)	2	8.32	77.7	15700000	37.29	720.35	1439.81	8.75
(R)HPEYAVSVLLR(L)	2	8.2	88.8	6360000	39.75	642.28	1283.71	6.75
(K)LGEYGFQNALIVR(Y)	2	7.8	94.5	420000000	43.67	740.33	1479.8	6
(K)YICDNQDTISSK(L)	2	7.71	63.3	5020000	18.63	722.69	1443.64	4.21
(K)YICDNQDTISSK(L)	2	7.69	90.4	54200000	3.71	722.45	1443.64	4.21
(K)QTALVELLK(H)	2	7.41	96.8	109000000	41.99	507.8	1014.62	6
(K)LVTDLTK(V)	2	6.89	96.1	12400000	19.2	395.26	789.472	5.84
(K)LVTDLTK(V)	2	6.65	93.6	22900000	21.23	395.22	789.472	5.84
(K)LVTDLTK(V)	2	6.57	89	3390000	19.32	395.25	789.472	5.84
(K)LVTDLTK(V)	2	6.2	96.7	23900000	15.3	395.2	789.472	5.84
(K)LVTDLTK(V)	2	6.02	85.4	13000000	17.85	395.18	789.472	5.84
