# Supplementary material for: Preparation of trypsin aptamer modified silica particles by surface initiated atom transfer radical polymerization for proteome identification
Source: Royal Society of Chemistry journal article supplement (doi:10.1039/c5ay02080h), 2016-01-01
Supplement: c5ay02080h6.xlsx [file c5ay02080h6.xlsx]

## Sheet: Sheet1
TAMSP-ATRP					Free-digestion
peptide sequence	RT (min)-1	RT(min-2)	RT(min-3）		peptide sequence	RT (min)-1	RT(min-2)	RT(min-3)	P（value)
(K)DAIPENLPPLTADFAEDK(D)	45.55	45.52	45.44		(K)DAIPENLPPLTADFAEDK(D)	45.55	45.68	45.91	P>0.05
(K)LVNELTEFAK(T)	37.95	37.44	37.41		(K)LVNELTEFAK(T)	37.95	37.92	38.66	P>0.05
(K)HLVDEPQNLIK(Q)	31.01	31.39	31.66		(K)HLVDEPQNLIK(Q)	31.59	31.54	31.47	P>0.05
(K)DDSPDLPK(L)	17.53	18.06	18.06		(K)DDSPDLPK(L)	18.35	16.27	18.06	P>0.05
(K)DLGEEHFK(G)	20.98	20.13	21.22		(K)DLGEEHFK(G)	21.9	21.27	21.22	P>0.05
(K)AEFVEVTK(L)	23.59	23.92	22.6		(K)AEFVEVTK(L)	23.58	23.59	23.58	P>0.05
(K)LGEYGFQNALIVR(Y)	43.54	43.56	43.09		(K)LGEYGFQNALIVR(Y)	43.58	43.55	43.35	P>0.05
